# Supplementary material for: Stereoselective synthesis of Δ(1)-pyrroline sulfonamides via a chiral aldehyde mediated cascade reaction
Source: Royal Society of Chemistry journal article supplement (doi:10.1039/d3qo01675g), 2023-11-15

## Supporting Information

*for*

### Stereoselective Synthesis of $\Delta(1)$ -Pyrroline Sulfonamides *via* Chiral Aldehyde Mediated Cascade Reaction

Wei Wen<sup>\*†a</sup>, Zhao-Pin Ai<sup>†a</sup>, Zhu-Lian Wu<sup>a</sup>, Tian Cai<sup>a</sup>, Qi-Xiang Guo<sup>\*a</sup>

<sup>a</sup> Chongqing Key Laboratory of Soft-Matter Material Chemistry and Function Manufacturing, School of Chemistry and Chemical Engineering, Southwest University, Chongqing, 400715, China.

#### Table of Contents

|                                                                      |    |
|----------------------------------------------------------------------|----|
| 1. General data .....                                                | 1  |
| 2. The synthesis of aldehyde catalysts <b>3g</b> and <b>3h</b> ..... | 1  |
| 3. Reaction conditions optimization.....                             | 7  |
| 4. General procedure for the catalytic asymmetric reaction .....     | 8  |
| 5. Control experiment and mechanism research .....                   | 30 |
| 6. X-Ray Structure of <b>4b</b> .....                                | 36 |
| 7. References.....                                                   | 36 |
| 8. The spectrums of <sup>1</sup> H NMR and <sup>13</sup> C NMR ..... | 37 |

## 1. General data

Solvents for reactions were dried appropriately before use: toluene, THF and Et<sub>2</sub>O were dried by refluxing with sodium and benzophenone as indicator. All other reagents were directly used as purchased from Adamas-beta<sup>®</sup> or Energy Chemical. <sup>1</sup>H NMR and <sup>13</sup>C NMR spectra were recorded on Bruker Avance 600 MHz spectrometer. Chemical shifts ( $\delta$ ) are reported in ppm from tetramethylsilane (TMS) with the solvent resonance as the internal standard. Proton signal multiplicities are given as s (singlet), d (doublet), t (triplet), q (quartet), m (multiplet), br (broad) or a combination of them. *J*-values are in Hz. HRMS (ESI-Q-TOF) spectra were recorded on Bruker Impact-II mass spectrometer. Enantiomer ratios were determined by HPLC (Chiralpak AD-H, IB-IG columns were purchased from Daicel Chemical Industries, LTD). Optical rotations were determined at  $\lambda = 589$  nm (sodium D line) by using a Rudolph-API automatic polarimeter. The substrates **2**<sup>[1]</sup> and glycinate ester hydrochlorides<sup>[2-3]</sup> were prepared according to previous literature, and the glycine tert-butyl ester was directly used as purchased. Chiral aldehyde catalysts **3a-3f**<sup>[4]</sup> were synthesized according to literature procedures.

## 2. The synthesis of aldehyde catalysts **3g** and **3h**

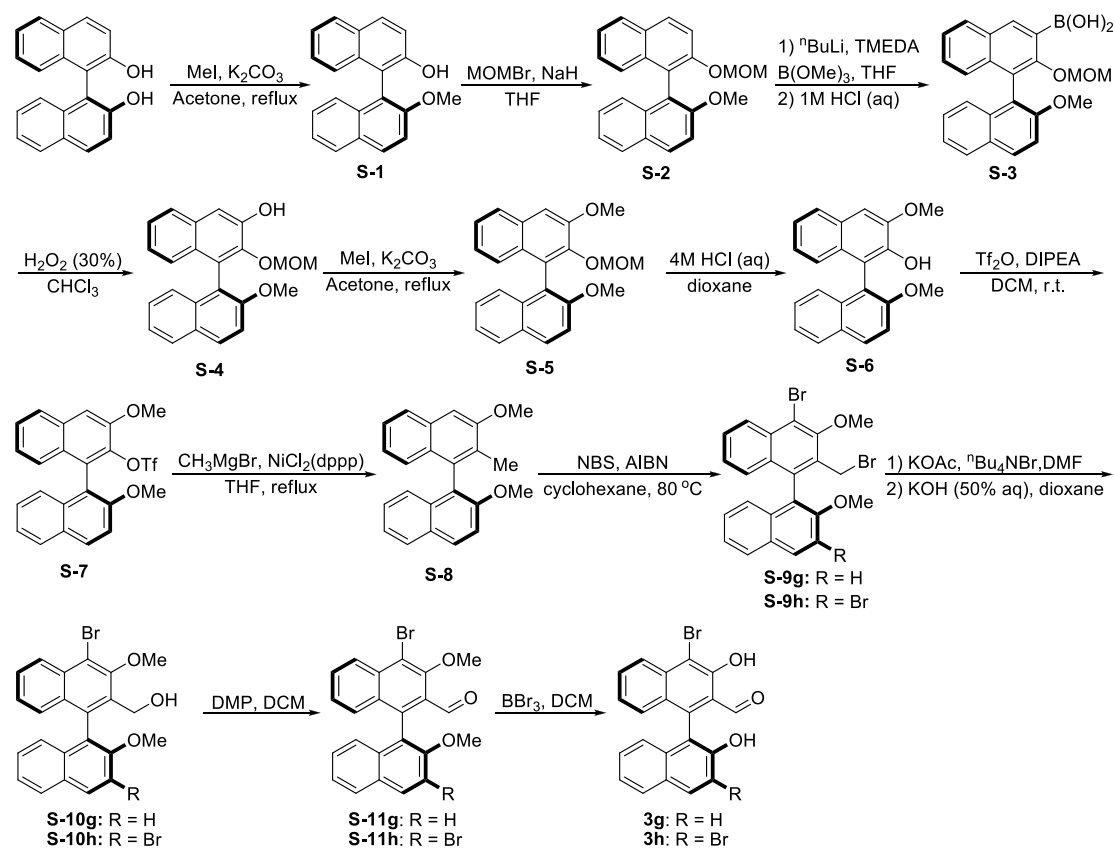

To a solution of (S)-1,1'-bi-2-naphthol (5.720 g, 20 mmol) and K<sub>2</sub>CO<sub>3</sub> (8.292 g, 60 mmol) in

acetone (40 mL) was added KI (3.124 g, 1.37 mL, 22 mmol). The mixture was refluxed for 12 h. The mixture was filtered and washed with dichloromethane. The filtrate was evaporated under vacuum and the residue was purified by chromatography on silica gel (petroleum ether/dichloromethane = 3/1) to obtain **S-1** as white solid (5.219 g, 87 % yield).

A solution of NaH (1.114 g, 27.84 mmol, 60% W) in dry 40 mL THF was cool to 0 °C. **S-1** (5.219 g, 17.40 mmol) was added slowly at 0 °C and stirred for 15 minutes. The mixture returned to room temperature and was stirred for 1 h. Bromomethyl methyl ether (3.263 g, 26.10 mmol) was added dropwise slowly to the mixture at 0 °C. The mixture returned to room temperature and was stirred for 5 h. A saturated ammonium chloride solution was added at 0 °C to quench the reaction. Then, the reaction mixture was extracted with EtOAc, and the organic phase was dried over anhydrous Na<sub>2</sub>SO<sub>4</sub>. After the solution was filtered and the solvent was evaporated under vacuum, the residue was recrystallized with petroleum ether and dichloromethane to give **S-2** as white solid (5.096 g, 85 % yield).

To a 250 mL of three-necked round-bottom flask was added **S-2** (5.096 g, 14.8 mmol), followed by dry THF (80 mL) and TMEDA (2.231 g, 2.88 mL, 19.2 mmol) under N<sub>2</sub>. Hexane solution of <sup>n</sup>BuLi (7.7 mL, 19.2 mmol, 2.5 M in Hexane) was added dropwise slowly at -78 °C, and the mixture was stirred at room temperature. After stirring for 5 h, B(OMe)<sub>3</sub> (4.613 g, 4.96 mL, 44.4 mmol) was added dropwise slowly at -78 °C. After stirring at room temperature for 24 h, HCl (20 mL, 1M) was added at 0 °C and the mixture was stirred for 0.5 h. Then, the reaction mixture was extracted with EtOAc, and the organic phase was dried over anhydrous Na<sub>2</sub>SO<sub>4</sub>, filtered and concentrated under vacuum to give the crude **S-3**.

To a solution of the residue **S-3** in CH<sub>3</sub>Cl (50 mL) was added H<sub>2</sub>O<sub>2</sub> (10.7 mL, 103.6 mmol, 30% W) at 0 °C. The reaction mixture was stirred at room temperature and monitored by TLC. After the reaction was completed, a saturated Na<sub>2</sub>SO<sub>3</sub> solution was added until no bubbles were generated. Then, the reaction mixture was extracted with EtOAc, and the organic phase was dried over anhydrous Na<sub>2</sub>SO<sub>4</sub>. After the solution was filtered and the solvent was evaporated under vacuum, the residue was purified by chromatography on silica gel (petroleum ether/ethyl acetate/dichloromethane = 40/1/2) to obtain **S-4** (3.073 g, 58 % yield).

**(S)-2'-methoxy-2-(methoxymethoxy)-[1,1'-binaphthalen]-3-ol (S-4):**

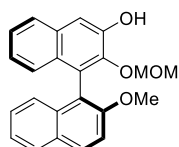

White solid; m.p. = 144-146 °C; R<sub>f</sub> = 0.22 (petroleum ether/ethyl acetate = 5:1); [α]<sub>D</sub><sup>25</sup> = -37.45 (c = 0.32, CH<sub>2</sub>Cl<sub>2</sub>); <sup>1</sup>H NMR (600 MHz, CDCl<sub>3</sub>) δ 7.99 (d, J = 9.0 Hz, 1H), 7.86 (d, J = 8.2 Hz, 1H), 7.75 (d, J = 8.2 Hz, 1H), 7.47 (s, 1H), 7.43 (d, J = 9.1 Hz, 1H), 7.36 – 7.30 (m, 2H), 7.23 (d, J = 7.8 Hz, 1H), 7.10 – 7.05 (m, 2H), 7.03 (d, J = 8.4 Hz, 1H), 4.75 (d, J = 6.1 Hz, 1H), 4.63 (d, J = 6.1 Hz, 1H), 3.77 (s,

3H), 3.34 (s, 3H);  $^{13}\text{C}$  NMR (151 MHz,  $\text{CDCl}_3$ )  $\delta$  154.74, 148.16, 145.08, 133.85, 132.24, 130.00, 129.06, 128.49, 127.98, 126.83, 126.68, 126.07, 125.77, 125.54, 125.14, 123.81, 123.76, 118.61, 113.51, 111.26, 99.68, 57.45, 56.54; HRMS(ESI): calcd. for  $\text{C}_{23}\text{H}_{21}\text{O}_4$  ( $\text{M}+\text{H}$ ) $^+$ : 361.1434, found: 361.1434.

To a solution of **S-4** (3.073 g, 8.5 mmol) and  $\text{K}_2\text{CO}_3$  (3.524 g, 25.5 mmol) in acetone (28 mL) was added  $\text{CH}_3\text{I}$  (4.828 g, 2.12 mL, 34 mmol). The reaction mixture was refluxed and monitored by TLC. After the reaction was completed, the mixture was filtered and washed with dichloromethane. The filtrate was evaporated under vacuum to give the residue **S-5**.

To a solution of **S-5** in dioxane (20 mL) was added HCl (8.5 mL, 4 M), and the reaction mixture was stirred at 60 °C. After the reaction was completed, the mixture was cooled to room temperature, extracted with EtOAc. The combined organic layer was dried over anhydrous  $\text{Na}_2\text{SO}_4$ , filtrated and concentrated under vacuum. The residue was then purified by chromatography on silica gel (petroleum ether/ethyl acetate/dichloromethane = 40/1/2) to obtain **S-6** (2.255 g, 80 % yield).

**(S)-2',3-dimethoxy-[1,1'-binaphthalen]-2-ol (S-6):**

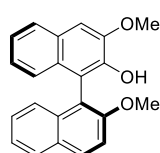

White solid; m.p. = 209-211 °C;  $R_f$  = 0.17 (petroleum ether/ethyl acetate = 5:1);  $[\alpha]_D^{25} = -67.11$  ( $c = 0.38$ ,  $\text{CH}_2\text{Cl}_2$ );  $^1\text{H}$  NMR (600 MHz,  $\text{CDCl}_3$ )  $\delta$  7.99 (d,  $J = 9.0$  Hz, 1H), 7.86 (d,  $J = 8.1$  Hz, 1H), 7.76 (d,  $J = 8.1$  Hz, 1H), 7.45 (d,  $J = 9.0$  Hz, 1H), 7.34 – 7.26 (m, 2H), 7.25 (s, 1H), 7.22 (d,  $J = 6.8$  Hz, 1H), 7.18 (d,  $J = 8.5$  Hz, 1H), 7.11 (t,  $J = 7.5$  Hz, 1H), 7.04 (d,  $J = 8.3$  Hz, 1H), 5.78 (s, 1H), 4.05 (s, 3H), 3.77 (s, 3H);  $^{13}\text{C}$  NMR (151 MHz,  $\text{CDCl}_3$ )  $\delta$  155.25, 147.32, 143.32, 133.76, 130.08, 129.29, 128.98, 128.02, 126.78, 126.64, 125.09, 124.82, 124.24, 123.82, 123.72, 117.62, 116.07, 114.08, 105.76, 56.86, 55.85; HRMS(ESI): calcd. for  $\text{C}_{22}\text{H}_{19}\text{O}_3$  ( $\text{M}+\text{H}$ ) $^+$ : 331.1329, found: 331.1328.

To a solution of **S-6** (2.255 g, 6.8 mmol) and DIPEA (2.193 g, 2.80 mL, 17.0 mmol) in dry  $\text{CH}_2\text{Cl}_2$  (20 mL) was added  $\text{TiF}_2\text{O}$  (3.835 g, 2.29 mL, 13.6 mmol) at 0 °C. After the reaction mixture was stirred for 0.5 h, a saturated  $\text{NaHCO}_3$  was added at 0 °C to quench the reaction. The mixture was extracted with  $\text{CH}_2\text{Cl}_2$ . The combined organic layer was dried over anhydrous  $\text{Na}_2\text{SO}_4$ , filtrated and concentrated under vacuum. The residue was then purified by chromatography on silica gel (petroleum ether/ethyl acetate/dichloromethane = 60/1/2) to obtain **S-7** (2.826 g, 90 % yield).

**(S)-2',3-dimethoxy-[1,1'-binaphthalen]-2-yl trifluoromethanesulfonate (S-7):**

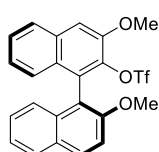

White solid; m.p. = 182-184 °C;  $R_f$  = 0.27 (petroleum ether/ethyl acetate = 5:1);  $[\alpha]_D^{25} = +26.87$  ( $c = 0.26$ ,  $\text{CH}_2\text{Cl}_2$ );  $^1\text{H}$  NMR (600 MHz,  $\text{CDCl}_3$ )  $\delta$  8.03 (d,  $J = 9.0$  Hz, 1H), 7.90 – 7.78 (m, 2H), 7.51 – 7.45 (m, 1H), 7.43 (d,  $J = 9.1$  Hz, 1H),

7.39 (s, 1H), 7.32 (t,  $J = 7.3$  Hz, 1H), 7.24 (d,  $J = 8.3$  Hz, 1H), 7.21 – 7.15 (m, 2H), 7.04 (d,  $J = 8.5$  Hz, 1H), 4.09 (s, 3H), 3.81 (s, 3H);  $^{13}\text{C}$  NMR (151 MHz,  $\text{CDCl}_3$ )  $\delta$  155.17, 149.37, 137.68, 133.56, 133.16, 131.03, 128.79, 128.19, 127.97, 127.28, 126.94, 126.91, 126.83, 124.91, 124.79, 123.68, 121.32, 119.20, 117.07, 114.99, 112.98, 107.90, 56.30, 56.08; HRMS(ESI): calcd. for  $\text{C}_{23}\text{H}_{17}\text{F}_3\text{NaO}_5\text{S}$  ( $\text{M}+\text{Na}$ ) $^+$ : 485.0641, found: 485.0640.

To a 100 mL of three-necked round-bottle flask was added **S-7** (2.826 g, 6.1 mmol) and  $\text{NiCl}_2(\text{dppp})$  (0.331 g, 0.61 mmol) under  $\text{N}_2$ , followed by dry THF (20 mL).  $\text{CH}_3\text{MgBr}$  (9.2 mL, 27.5 mmol, 3.0 M in THF) was added dropwise at 0 °C, and then the mixture was refluxed. After the reaction was completed,  $\text{H}_2\text{O}$  was added to quench the reaction. The mixture was extracted with EtOAc. The combined organic layer was dried over anhydrous  $\text{Na}_2\text{SO}_4$ , filtrated and concentrated under vacuum. The residue was then purified by chromatography on silica gel (petroleum ether/ethyl acetate/dichloromethane = 80/1/2) to obtain **S-8** (1.795 g, 91 % yield).

**(S)-2',3-dimethoxy-2-methyl-1,1'-binaphthalene (S-8):**

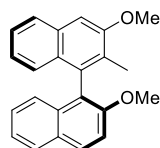

White solid; m.p. = 232-235 °C;  $R_f = 0.40$  (petroleum ether/ethyl acetate = 20:1);  $[\alpha]_D^{25} = -27.84$  ( $c = 0.49$ ,  $\text{CH}_2\text{Cl}_2$ );  $^1\text{H}$  NMR (600 MHz,  $\text{CDCl}_3$ )  $\delta$  7.97 (d,  $J = 9.0$  Hz, 1H), 7.86 (d,  $J = 8.1$  Hz, 1H), 7.78 (d,  $J = 8.1$  Hz, 1H), 7.43 (d,  $J = 9.0$  Hz, 1H), 7.37 – 7.27 (m, 2H), 7.22 (s, 1H), 7.19 (t,  $J = 7.5$  Hz, 1H), 7.11 – 6.93 (m, 3H), 4.01 (s, 3H), 3.74 (s, 3H), 1.97 (s, 3H);  $^{13}\text{C}$  NMR (151 MHz,  $\text{CDCl}_3$ )  $\delta$  156.47, 154.44, 134.02, 133.63, 133.15, 129.37, 129.09, 128.62, 128.05, 127.87, 126.65, 126.52, 125.86, 125.24, 125.15, 123.59, 123.43, 121.89, 113.80, 104.39, 56.61, 55.30, 13.68; HRMS(ESI): calcd. for  $\text{C}_{23}\text{H}_{21}\text{O}_2$  ( $\text{M}+\text{H}$ ) $^+$ : 329.1536, found: 329.1536.

To a 100 mL of round-bottle flask was added **S-8** (1.795 g, 5.5 mmol), NBS (8.811 g, 49.5 mmol) and AIBN (0.090 g, 0.55 mmol), followed by cyclohexane (40 mL). Then, the mixture was stirred at 80 °C for 48 h. The mixture was cooled to room temperature, diluted with  $\text{H}_2\text{O}$ , and extracted with EtOAc. The combined organic layer was dried over anhydrous  $\text{Na}_2\text{SO}_4$ , filtrated and concentrated under vacuum. The residue was then purified by chromatography on silica gel (petroleum ether/ethyl acetate = 80/1) to obtain **S-9h**.

A solution of **S-9h** in DMF (22 mL) was added KOAc (2.695 g, 27.5 mmol) and  $^t\text{Bu}_4\text{NBr}$  (0.886 g, 2.75 mmol), the mixture was stirred at 80 °C. After the reaction was completed, the mixture was cooled to room temperature, diluted with EtOAc and saturated NaCl, extracted with EtOAc. The combined organic layer was washed with saturated NaCl five times, dried over anhydrous  $\text{Na}_2\text{SO}_4$ , filtrated and concentrated under vacuum to obtain the residue.

Dissolve the residue in 14 mL dioxane and KOH solution (14 mL, 50% W) was added, the mixture was stirred at 80 °C. After the reaction was completed, the mixture was cooled to room

temperature, diluted with EtOAc and H<sub>2</sub>O, extracted with EtOAc. The combined organic layer was dried over Na<sub>2</sub>SO<sub>4</sub>, filtrated and concentrated under vacuum. The residue was then purified by chromatography on silica gel (petroleum ether/ethyl acetate = 100/1) to obtain **S-10h** (1.5123 g, 55% yield).

**(S)-(3',4-dibromo-2',3-dimethoxy-[1,1'-binaphthalen]-2-yl)methanol (S-10h):**

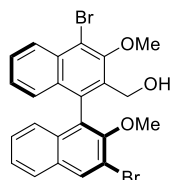

White solid; m.p. = 149-152 °C; R<sub>f</sub> = 0.20 (petroleum ether/ethyl acetate = 5:1); [α]<sub>D</sub><sup>25</sup> = +36.69 (c = 0.19, CH<sub>2</sub>Cl<sub>2</sub>); <sup>1</sup>H NMR (600 MHz, CDCl<sub>3</sub>) δ 8.36 (d, *J* = 8.5 Hz, 1H), 8.05 (s, 1H), 7.94 (d, *J* = 9.1 Hz, 1H), 7.55 (t, *J* = 7.6 Hz, 1H), 7.49 (d, *J* = 9.1 Hz, 1H), 7.27 (d, *J* = 10.1 Hz, 1H), 7.22 (t, *J* = 7.6 Hz, 1H), 7.00 (d, *J* = 8.4 Hz, 1H), 6.79 (d, *J* = 9.0 Hz, 1H), 4.67 – 4.58 (m, 1H), 4.30 – 4.22 (m, 1H), 4.15 (s, 3H), 3.79 (s, 3H), 2.45 – 2.32 (m, 1H); <sup>13</sup>C NMR (151 MHz, CDCl<sub>3</sub>) δ 154.67, 154.58, 134.45, 134.37, 133.09, 132.36, 131.28, 130.46, 130.19, 129.98, 129.50, 127.71, 127.08, 126.85, 126.63, 126.16, 120.50, 118.09, 116.54, 114.64, 62.33, 59.82, 56.83; HRMS(ESI): calcd. for C<sub>23</sub>H<sub>18</sub>Br<sub>2</sub>NaO<sub>3</sub> (M+Na)<sup>+</sup>: 522.9515, found: 522.9514.

To a solution of **S-10h** (1.5123 g, 3 mmol) in dry DCM (30 mL) was added DMP (3.816 g, 9 mmol) at 0 °C. Then, the mixture was stirred at room temperature. After the reaction was completed, saturated Na<sub>2</sub>S<sub>2</sub>O<sub>3</sub> was added to quench the reaction. The mixture was extracted with DCM. The combined organic layer was dried over Na<sub>2</sub>SO<sub>4</sub>, filtrated and concentrated under vacuum. The residue was then purified by chromatography on silica gel (petroleum ether/ethyl acetate = 20/1) to obtain **S-11h** (1.387 g, 92% yield).

**(S)-3',4-dibromo-2',3-dimethoxy-[1,1'-binaphthalene]-2-carbaldehyde (S-11h):**

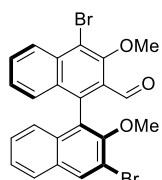

Pale yellow solid; m.p. = 138-140 °C; R<sub>f</sub> = 0.41 (petroleum ether/ethyl acetate = 5:1); [α]<sub>D</sub><sup>25</sup> = +18.15 (c = 0.27, CH<sub>2</sub>Cl<sub>2</sub>); <sup>1</sup>H NMR (600 MHz, CDCl<sub>3</sub>) δ 9.88 (s, 1H), 8.39 (d, *J* = 8.5 Hz, 1H), 8.04 (s, 1H), 7.95 (d, *J* = 9.1 Hz, 1H), 7.67 (t, *J* = 7.4 Hz, 1H), 7.44 (d, *J* = 9.1 Hz, 1H), 7.33 – 7.26 (m, 2H), 7.20 (d, *J* = 8.4 Hz, 1H), 6.81 (d, *J* = 9.0 Hz, 1H), 4.07 (s, 3H), 3.76 (s, 3H); <sup>13</sup>C NMR (151 MHz, CDCl<sub>3</sub>) δ 190.65, 154.96, 153.95, 140.62, 135.21, 132.36, 130.94, 130.58, 130.16, 130.08, 129.87, 129.75, 128.95, 127.38, 127.23, 126.74, 126.41, 118.02, 117.90, 117.76, 113.85, 62.64, 56.37; HRMS(ESI): calcd. for C<sub>23</sub>H<sub>16</sub>Br<sub>2</sub>NaO<sub>3</sub> (M+Na)<sup>+</sup>: 520.9358, found: 520.9356.

To a solution of **S-11h** (1.387 g, 2.77 mmol) in dry DCM (28 mL) was added BBr<sub>3</sub> (12.47 mL, 12.47 mmol, 1.0 M in DCM) at -78 °C under N<sub>2</sub>. After stirring at -78 °C for 1 h, continue stirring the mixture at room temperature for 0.5 h, and the HCl (1.0 M) was added to quench the reaction. The mixture was extracted with DCM. The combined organic layer was dried over Na<sub>2</sub>SO<sub>4</sub>, filtrated and concentrated under vacuum. The residue was then purified by chromatography on

silica gel (petroleum ether/ethyl acetate = 100/1) to obtain **3h** (1.094 g, 84% yield).

**(S)-3',4-dibromo-2',3-dihydroxy-[1,1'-binaphthalene]-2-carbaldehyde (3h):**

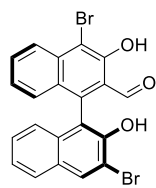

Yellow solid; m.p. = 212-214 °C;  $R_f$  = 0.17 (petroleum ether/ethyl acetate = 5:1);  $[\alpha]_D^{25} = -47.89$  ( $c = 0.28$ ,  $\text{CH}_2\text{Cl}_2$ );  $^1\text{H NMR}$  (600 MHz,  $\text{CDCl}_3$ )  $\delta$  11.90 (s, 1H), 9.54 (s, 1H), 8.32 (d,  $J = 8.6$  Hz, 1H), 8.06 (s, 1H), 7.90 (d,  $J = 8.9$  Hz, 1H), 7.70 (t,  $J = 7.6$  Hz, 1H), 7.39 – 7.31 (m, 2H), 7.29 (d,  $J = 8.4$  Hz, 1H), 7.26 – 7.21 (m, 1H), 6.82 (d,  $J = 9.0$  Hz, 1H), 5.30 (s, 1H);  $^{13}\text{C NMR}$  (151 MHz,  $\text{CDCl}_3$ )  $\delta$  197.05, 153.66, 151.99, 140.42, 136.97, 132.81, 132.05, 131.07, 130.59, 130.27, 129.83, 127.89, 127.17, 126.67, 126.23, 125.77, 120.52, 118.69, 118.10, 113.06, 108.85; **HRMS(ESI)**: calcd. for  $\text{C}_{21}\text{H}_{13}\text{Br}_2\text{O}_3$  ( $\text{M}+\text{H}$ ) $^+$ : 470.9226, found: 470.9225.

To a 100 mL of round-bottle flask was added **S-8** (1.207 g, 3.68 mmol), NBS (3.275 g, 18.4 mmol) and AIBN (0.060 g, 0.37 mmol), followed by cyclohexane (26 mL). Then, the mixture was stirred at 80 °C for 6 h. The mixture was cooled to room temperature, extracted with EtOAc. The combined organic layer was dried over  $\text{Na}_2\text{SO}_4$ , filtrated and concentrated under vacuum. The residue was then purified by chromatography on silica gel (petroleum ether/ethyl acetate = 80/1) to obtain **S-9g**.

**S-10g**, **S-11g** and **3g** were prepared according to the steps of preparing **S-10h**, **S-11h**, and **3h**.  
**(S)-(4-bromo-2',3-dimethoxy-[1,1'-binaphthalen]-2-yl)methanol (S-10g):**

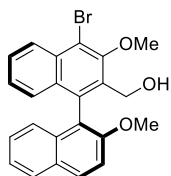

White solid; m.p. = 134-137 °C;  $R_f$  = 0.21 (petroleum ether/ethyl acetate = 5:1);  $[\alpha]_D^{25} = +16.67$  ( $c = 0.29$ ,  $\text{CH}_2\text{Cl}_2$ );  $^1\text{H NMR}$  (600 MHz,  $\text{CDCl}_3$ )  $\delta$  8.35 (d,  $J = 8.5$  Hz, 1H), 8.03 (d,  $J = 9.1$  Hz, 1H), 7.89 (d,  $J = 8.2$  Hz, 1H), 7.54 (t,  $J = 7.6$  Hz, 1H), 7.47 (d,  $J = 9.1$  Hz, 1H), 7.34 (t,  $J = 7.4$  Hz, 1H), 7.24 – 7.21 (m, 2H), 7.06 (d,  $J = 8.4$  Hz, 1H), 6.91 (d,  $J = 8.5$  Hz, 1H), 4.64 (d,  $J = 11.6$  Hz, 1H), 4.27 (d,  $J = 11.6$  Hz, 1H), 4.15 (s, 3H), 3.78 (s, 3H), 2.41 (s, 1H);  $^{13}\text{C NMR}$  (151 MHz,  $\text{CDCl}_3$ )  $\delta$  154.58, 154.39, 135.16, 134.44, 133.83, 133.05, 131.46, 130.44, 129.19, 128.07, 127.60, 127.16, 126.99, 126.86, 125.99, 124.97, 124.20, 120.24, 116.28, 113.67, 62.34, 59.84, 56.84; **HRMS(ESI)**: calcd. for  $\text{C}_{23}\text{H}_{19}\text{BrNaO}_3$  ( $\text{M}+\text{Na}$ ) $^+$ : 445.0410, found: 445.0410.

**(S)-4-bromo-2',3-dimethoxy-[1,1'-binaphthalene]-2-carbaldehyde (S-11g):**

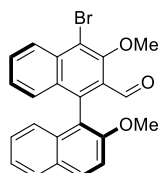

Pale yellow solid; m.p. = 134-136 °C;  $R_f$  = 0.41 (petroleum ether/ethyl acetate = 5:1);  $[\alpha]_D^{25} = +3.82$  ( $c = 0.13$ ,  $\text{CH}_2\text{Cl}_2$ );  $^1\text{H NMR}$  (600 MHz,  $\text{CDCl}_3$ )  $\delta$  9.82 (s, 1H), 8.39 (d,  $J = 8.6$  Hz, 1H), 8.05 (d,  $J = 9.1$  Hz, 1H), 7.89 (d,  $J = 8.2$  Hz, 1H), 7.69 – 7.61 (m, 1H), 7.43 (d,  $J = 9.1$  Hz, 1H), 7.33 (d,  $J = 7.1$  Hz, 1H), 7.28 – 7.22 (m, 3H), 6.94 (d,  $J = 8.5$  Hz, 1H), 4.07 (s, 3H), 3.77 (s, 3H);  $^{13}\text{C NMR}$  (151 MHz,  $\text{CDCl}_3$ )  $\delta$  191.00, 154.82, 153.69, 142.05, 135.17, 133.88, 131.09, 130.90, 130.09, 128.94, 128.72, 128.14, 127.36, 127.35, 127.30, 126.57, 124.67, 123.97, 117.89, 117.32, 112.81, 62.51, 56.35;

**HRMS(ESI):** calcd. for C<sub>23</sub>H<sub>18</sub>BrO<sub>3</sub> (M+H)<sup>+</sup>: 421.0434, found: 421.0433.

**(S)-4-bromo-2',3-dihydroxy-[1,1'-binaphthalene]-2-carbaldehyde (3g):**

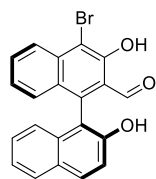

Yellow solid; m.p. = 169-171 °C; R<sub>f</sub> = 0.18 (petroleum ether/ethyl acetate = 5:1);

[α]<sub>D</sub><sup>25</sup> = -45.55 (c = 0.54, CH<sub>2</sub>Cl<sub>2</sub>); <sup>1</sup>H NMR (600 MHz, CDCl<sub>3</sub>) δ 11.94 (s, 1H),

9.55 (s, 1H), 8.31 (d, *J* = 8.5 Hz, 1H), 7.98 (d, *J* = 8.9 Hz, 1H), 7.89 (d, *J* = 8.1 Hz, 1H), 7.69 (t, *J* = 7.6 Hz, 1H), 7.44 – 7.32 (m, 2H), 7.32 – 7.26 (m, 2H), 7.24

– 7.19 (m, 1H), 6.94 (d, *J* = 8.4 Hz, 1H), 5.12 (s, 1H); <sup>13</sup>C NMR (151 MHz, CDCl<sub>3</sub>) δ 197.42,

153.67, 151.66, 141.37, 136.94, 134.29, 131.95, 131.56, 128.72, 128.28, 128.03, 127.83, 127.40,

126.56, 125.61, 124.49, 124.21, 120.61, 117.49, 112.74, 108.50; **HRMS(ESI):** calcd. for

C<sub>21</sub>H<sub>14</sub>BrO<sub>3</sub> (M+H)<sup>+</sup>: 391.0121, found: 391.0120.

### 3. Reaction conditions optimization

**Table S1: Aldehyde catalyst screening**

| entry | 3         | t (min) | yield (%) <sup>[b]</sup> | ee (%) <sup>[c]</sup> |
|-------|-----------|---------|--------------------------|-----------------------|
| 1     | <b>3a</b> | 60      | 20                       | 12                    |
| 2     | <b>3b</b> | 50      | 16                       | 30                    |
| 3     | <b>3c</b> | 35      | 15                       | 20                    |
| 4     | <b>3d</b> | 35      | 10                       | 10                    |
| 6     | <b>3e</b> | 20      | 3                        | 0                     |

**S-3a:** R = H  
**S-3b:** R = TMS  
**S-3c:** R = Me  
**S-3d:** R = Ph  
**S-3e:** R = I

[a] Unless noted otherwise, reaction conditions: **1a** (0.15 mmol), **2a** (0.10 mmol), **S-3** (0.01 mmol) and TMG (0.10 mmol) in toluene (1.0 mL), carried out in air at 60 °C. [b] Isolated yield. [c] Determined by chiral HPLC analysis.

**Table S2: Screening the volume of toluene**

| entry | V (mL) | t (h) | yield (%) <sup>[b]</sup> | dr <sup>[c]</sup> | ee (%) <sup>[d]</sup> |
|-------|--------|-------|--------------------------|-------------------|-----------------------|
| 1     | 0.5    | 5     | 89                       | 88:12             | 76                    |



|   |     |   |    |       |    |
|---|-----|---|----|-------|----|
| 2 | 1.0 | 6 | 92 | 88:12 | 72 |
| 3 | 2.0 | 5 | 78 | 89:11 | 69 |

[a] Unless noted otherwise, reaction conditions: **1a** (0.15 mmol), **2a** (0.10 mmol), *ent*-**3h** (0.01 mmol) and pyrrolidine (0.1 mmol) in toluene, carried out in air at 60 °C. [b] Isolated yield. [c] Determined by chiral HPLC analysis. [d] Determined by chiral HPLC analysis.

**Table S3: Temperature screening**

| entry | T (°C) | T (h) | yield (%) <sup>[b]</sup> | dr <sup>[c]</sup> | ee (%) <sup>[d]</sup> |
|-------|--------|-------|--------------------------|-------------------|-----------------------|
| 1     | 60     | 5     | 96                       | 88:12             | 77                    |
| 2     | 40     | 5     | 96                       | 87:13             | 80                    |
| 3     | 20     | 5     | 92                       | 88:12             | 82                    |
| 4     | 0      | 5     | 86                       | 87:13             | 87                    |
| 5     | -10    | 5     | 89                       | 89:11             | 87                    |
| 6     | -20    | 5     | 71                       | 92:8              | 88                    |

[a] Unless noted otherwise, reaction conditions: **1a** (0.15 mmol), **2a** (0.10 mmol), **3h** (0.01 mmol) and pyrrolidine (0.15 mmol) in toluene (0.5 mL), carried out in air at T °C. [b] Isolated yield. [c] Determined by chiral HPLC analysis. [d] Determined by chiral HPLC analysis.

#### 4. General procedure for the catalytic asymmetric reaction

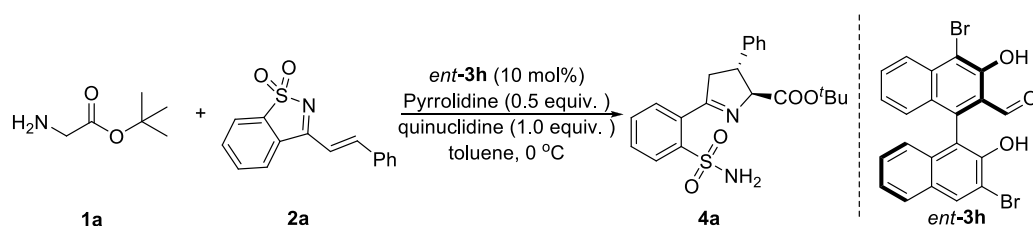

**General procedure a.** A dry and clean tube was charged with **2a** (53.8 mg, 0.2 mmol) and aldehyde catalyst *ent*-**3h** (9.4 mg, 0.02 mmol). After the addition of toluene (2.0 mL), the reaction mixture was stirred at 0 °C for 5 minutes. Then, glycine tert-butyl ester **1a** (0.3 mmol), quinuclidine (22.2 mg, 0.2 mmol) and pyrrolidine (7.1 mg, 0.1 mmol) were added, the reaction mixture was stirred at 0 °C and monitored by TLC. After the reaction was completed, the solvent was removed by rotary evaporation, and the residue was purified by flash chromatography column on silica gel (eluent: petroleum ether/ethyl acetate =3/1) to give the product **4a**.

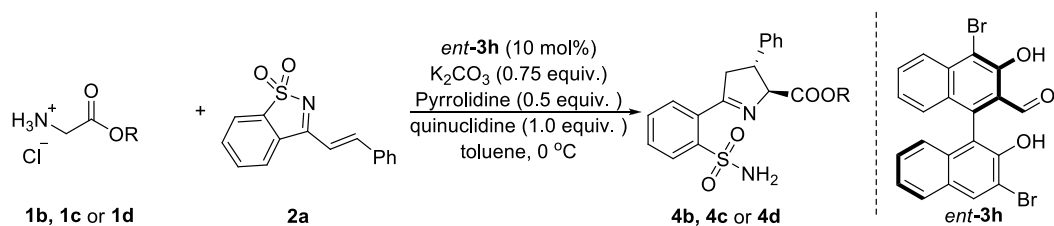

**General procedure b.** A dry and clean tube was charged with glycinate ester hydrochloride **1** (0.3 mmol),  $\text{K}_2\text{CO}_3$  (20.7 mg, 0.15 mmol). After the addition of toluene (2.0 mL), the reaction mixture was stirred at room temperature for 30 minutes. Then, the reaction mixture was stirred at 0 °C for 5 minutes. **2a** (53.8 mg, 0.2 mmol), aldehyde catalyst *ent-3h* (9.4 mg, 0.02 mmol), quinuclidine (22.2 mg, 0.2 mmol) and pyrrolidine (7.1 mg, 0.1 mmol) were added. The reaction mixture was stirred at 0 °C and monitored by TLC. After the reaction was completed, the solvent was removed under vacuum, and the residue was purified by flash chromatography column on silica gel (eluent: petroleum ether/ethyl acetate =3/1) to give the corresponding product **4**.

**tert-butyl (2S,3R)-3-phenyl-5-(2-sulfamoylphenyl)-3,4-dihydro-2H-pyrrole-2-carboxylate (4a):**

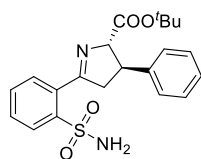

Colorless oil (74.2 mg, 93%);  $R_f = 0.29$  (petroleum ether/ethyl acetate = 2:1); the enantiomeric excess was determined to be 94% by HPLC analysis on Daicel Chirapak IB column (hexane/isopropanol = 80/20, flow rate 0.5 mL/min,  $T = 30$  °C), UV 220 nm,  $t_R(\text{major})$  19.257 min,  $t_R(\text{minor})$  24.205 min;  $[\alpha]_D^{25} = +29.82$  ( $c = 0.63$ ,  $\text{CH}_2\text{Cl}_2$ );  $^1\text{H NMR}$  (600 MHz,  $\text{CDCl}_3$ )  $\delta$  8.16 (d,  $J = 7.8$  Hz, 1H), 7.61 (t,  $J = 7.5$  Hz, 1H), 7.59 – 7.51 (m, 2H), 7.39 – 7.34 (m, 2H), 7.34 – 7.30 (m, 2H), 7.26 (t,  $J = 7.1$  Hz, 1H), 6.30 (s, 2H), 4.92 (d,  $J = 6.9$  Hz, 1H), 3.91 – 3.80 (m, 1H), 3.71 – 3.61 (m, 1H), 3.23 – 3.10 (m, 1H), 1.47 (s, 9H);  $^{13}\text{C NMR}$  (151 MHz,  $\text{CDCl}_3$ )  $\delta$  176.25, 170.77, 142.62, 141.17, 133.23, 132.09, 129.98, 129.25, 128.91, 128.50, 127.29, 127.05, 83.50, 82.32, 48.55, 46.44, 28.03; **HRMS(ESI)**: calcd. for  $\text{C}_{21}\text{H}_{25}\text{N}_2\text{O}_4\text{S}$  ( $\text{M}+\text{H}$ ) $^+$ : 401.1530, found: 401.1527.

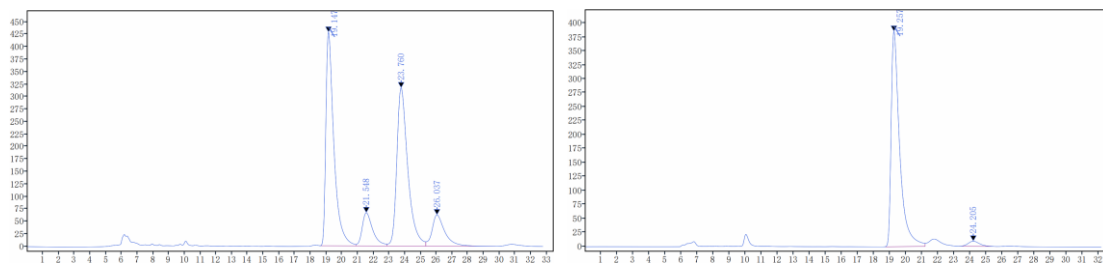

| Peak   | RetTime [min] | Type   | Width [min] | Area [mAU*s] | Height [mAU] | Area% |
|--------|---------------|--------|-------------|--------------|--------------|-------|
| 19.147 | BV            | 2.2719 | 15151.1465  | 427.9333     | 40.8658      |       |
| 21.548 | VV            | 1.9815 | 3093.6955   | 66.3964      | 8.3443       |       |
| 23.760 | VV            | 2.4672 | 15343.4147  | 316.9625     | 41.3844      |       |
| 26.037 | VB            | 4.4245 | 3487.1290   | 62.4652      | 9.4055       |       |

  

| Peak   | RetTime [min] | Type   | Width [min] | Area [mAU*s] | Height [mAU] | Area% |
|--------|---------------|--------|-------------|--------------|--------------|-------|
| 19.257 | BV            | 2.6106 | 14232.7867  | 385.6134     | 96.9612      |       |
| 24.205 | BB            | 2.3633 | 446.0571    | 9.0976       | 3.0388       |       |

**methyl (2S,3R)-3-phenyl-5-(2-sulfamoylphenyl)-3,4-dihydro-2H-pyrrole-2-carboxylate (4b):**

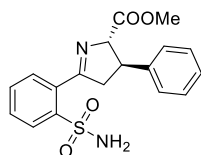

White solid (62.9 mg, 88%); m.p. = 123-126 °C;  $R_f$  = 0.11 (petroleum ether/ethyl acetate = 2:1); the enantiomeric excess was determined to be 91% by HPLC analysis on Daicel Chirapak IC column (hexane/isopropanol = 70/30, flow rate 1.0 mL/min, T = 30 °C), UV 220 nm,  $t_R$ (major) 57.801 min,  $t_R$ (minor) 67.474 min;  $[\alpha]_D^{25}$  = +38.44 (c = 0.42, CH<sub>2</sub>Cl<sub>2</sub>); **<sup>1</sup>H NMR (600 MHz, CDCl<sub>3</sub>)** δ 8.15 (d,  $J$  = 7.5 Hz, 1H), 7.62 (t,  $J$  = 7.1 Hz, 1H), 7.59 – 7.51 (m, 2H), 7.39 – 7.34 (m, 2H), 7.34 – 7.30 (m, 2H), 7.29 – 7.26 (m, 1H), 6.21 (s, 2H), 5.05 (d,  $J$  = 6.5 Hz, 1H), 3.96 – 3.87 (m, 1H), 3.78 (s, 3H), 3.74 – 3.65 (m, 1H), 3.22 – 3.12 (m, 1H); **<sup>13</sup>C NMR (151 MHz, CDCl<sub>3</sub>)** δ 176.98, 172.07, 142.46, 141.08, 133.15, 132.15, 130.06, 129.16, 129.04, 128.48, 127.20, 127.16, 82.73, 52.55, 48.83, 46.13; **HRMS(ESI)**: calcd. for C<sub>18</sub>H<sub>19</sub>N<sub>2</sub>O<sub>4</sub>S (M+H)<sup>+</sup>: 359.1060, found: 359.1058.

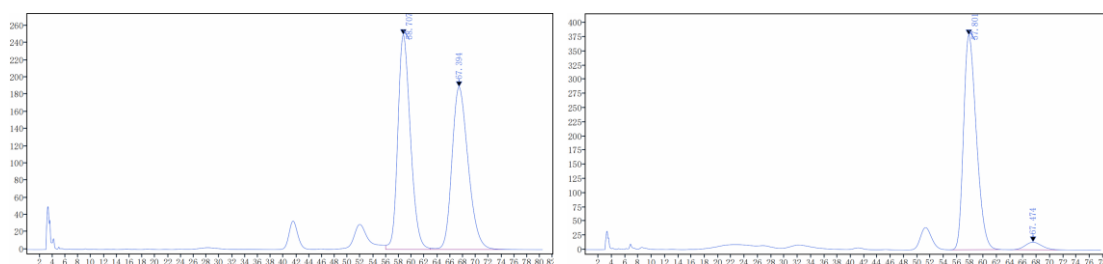

| Peak | RetTime [min] | Type | Width[min] | Area[mAU*s] | Height[mAU] | Area%   | Peak | RetTime [min] | Type | Width[min] | Area[mAU*s] | Height[mAU] | Area%   |
|------|---------------|------|------------|-------------|-------------|---------|------|---------------|------|------------|-------------|-------------|---------|
|      | 58.707        | MM m | 2.1286     | 34098.9356  | 249.7963    | 50.6106 |      | 57.801        | BB   | 8.1983     | 50870.9907  | 378.4446    | 95.6300 |
|      | 67.394        | MM m | 2.5845     | 33276.1524  | 189.2373    | 49.3894 |      | 67.474        | BB   | 8.8000     | 2324.6441   | 13.3569     | 4.3700  |

#### ethyl (2S,3R)-3-phenyl-5-(2-sulfamoylphenyl)-3,4-dihydro-2H-pyrrole-2-carboxylate (4c):

White solid (56.4 mg, 76%); m.p. = 101-103 °C;  $R_f$  = 0.15 (petroleum ether/ethyl acetate = 2:1); the enantiomeric excess was determined to be 88% by HPLC analysis on Daicel Chirapak ID column (hexane/isopropanol = 70/30, flow rate 1.0 mL/min, T = 30 °C), UV 220 nm,  $t_R$ (major) 23.847 min,  $t_R$ (minor) 38.562 min;  $[\alpha]_D^{25}$  = +31.15 (c = 0.32, CH<sub>2</sub>Cl<sub>2</sub>); **<sup>1</sup>H NMR (600 MHz, CDCl<sub>3</sub>)** δ 8.16 (d,  $J$  = 7.8 Hz, 1H), 7.64 – 7.60 (m, 1H), 7.59 – 7.51 (m, 2H), 7.40 – 7.34 (m, 2H), 7.34 – 7.30 (m, 2H), 7.29 – 7.26 (m, 1H), 6.21 (s, 2H), 5.02 (d,  $J$  = 6.6 Hz, 1H), 4.32 – 4.19 (m, 2H), 3.95 – 3.87 (m, 1H), 3.74 – 3.65 (m, 1H), 3.22 – 3.14 (m, 1H), 1.29 (t,  $J$  = 7.1 Hz, 3H); **<sup>13</sup>C NMR (151 MHz, CDCl<sub>3</sub>)** δ 176.82, 171.63, 142.50, 141.13, 133.21, 132.14, 130.04, 129.18, 129.01, 128.51, 127.21, 127.17, 82.82, 61.64, 48.74, 46.24, 14.17; **HRMS(ESI)**: calcd. for C<sub>19</sub>H<sub>21</sub>N<sub>2</sub>O<sub>4</sub>S (M+H)<sup>+</sup>: 373.1217, found: 373.1213.

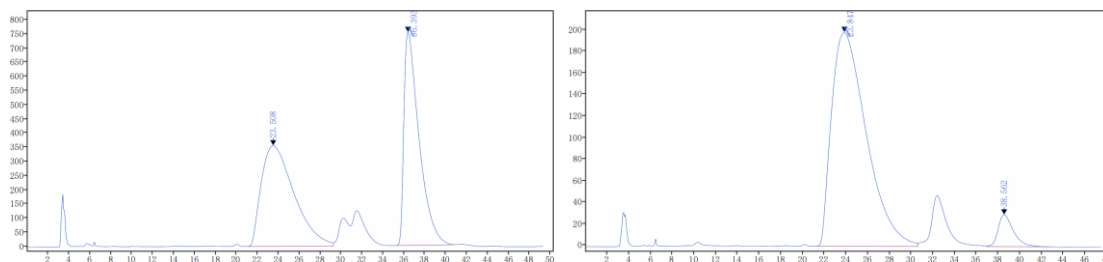

| Peak | RetTime [min] | Type | Width [min] | Area [mAU*s] | Height [mAU] | Area%   |
|------|---------------|------|-------------|--------------|--------------|---------|
|      | 23.508        | BV   | 8.3060      | 76960.3788   | 355.0274     | 50.5305 |
|      | 36.393        | BB   | 5.7133      | 75344.3027   | 751.5887     | 49.4695 |

| Peak | RetTime [min] | Type | Width [min] | Area [mAU*s] | Height [mAU] | Area%   |
|------|---------------|------|-------------|--------------|--------------|---------|
|      | 23.847        | MM m | 3.3560      | 44127.5823   | 198.3870     | 93.8473 |
|      | 38.562        | MM m | 1.4431      | 2893.0397    | 29.5002      | 6.1527  |

**isopropyl (2S,3R)-3-phenyl-5-(2-sulfamoylphenyl)-3,4-dihydro-2H-pyrrole-2-carboxylate (4d):**

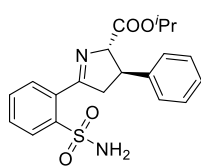

White solid (62.7 mg, 81%); m.p. = 121-124 °C;  $R_f$  = 0.21 (petroleum ether/ethyl acetate = 2:1); the enantiomeric excess was determined to be 92% by HPLC analysis on Daicel Chirapak IC column (hexane/isopropanol = 70/30, flow rate 1.0 mL/min, T = 30 °C), UV 220 nm,  $t_R$ (major) 34.947 min,  $t_R$ (minor) 29.745 min;  $[\alpha]_D^{25}$  = +26.84 (c = 0.49, CH<sub>2</sub>Cl<sub>2</sub>); <sup>1</sup>H NMR (600 MHz, CDCl<sub>3</sub>) δ 8.16 (d, J = 7.8 Hz, 1H), 7.62 (t, J = 7.4 Hz, 1H), 7.58 – 7.51 (m, 2H), 7.39 – 7.34 (m, 2H), 7.34 – 7.30 (m, 2H), 7.29 – 7.26 (m, 1H), 6.24 (s, 2H), 5.16 – 5.07 (m, 1H), 4.98 (d, J = 6.8 Hz, 1H), 3.92 – 3.84 (m, 1H), 3.72 – 3.64 (m, 1H), 3.23 – 3.14 (m, 1H), 1.27 (t, J = 6.2 Hz, 6H); <sup>13</sup>C NMR (151 MHz, CDCl<sub>3</sub>) δ 176.67, 171.22, 142.47, 141.14, 133.24, 132.12, 130.00, 129.18, 128.96, 128.50, 127.25, 127.13, 82.90, 69.38, 48.66, 46.45, 21.78, 21.74; HRMS(ESI): calcd. for C<sub>20</sub>H<sub>23</sub>N<sub>2</sub>O<sub>4</sub>S (M+H)<sup>+</sup>: 387.1373, found: 387.1371.

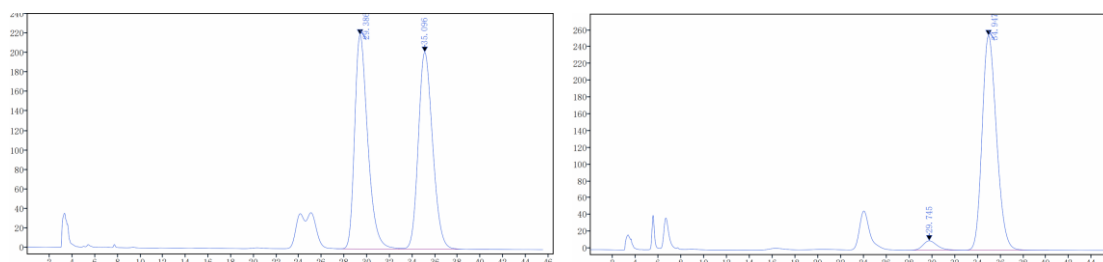

| Peak | RetTime [min] | Type | Width [min] | Area [mAU*s] | Height [mAU] | Area%   |
|------|---------------|------|-------------|--------------|--------------|---------|
|      | 29.386        | MM m | 1.2158      | 17607.1172   | 219.5154     | 49.8146 |
|      | 35.096        | MM m | 1.3607      | 17738.1871   | 201.9554     | 50.1854 |

| Peak | RetTime [min] | Type | Width [min] | Area [mAU*s] | Height [mAU] | Area%   |
|------|---------------|------|-------------|--------------|--------------|---------|
|      | 29.745        | MM m | 1.2521      | 962.8973     | 11.1542      | 4.1183  |
|      | 34.947        | MM m | 1.3574      | 22417.9402   | 255.8081     | 95.8817 |

**tert-butyl (2S,3R)-5-(2-sulfamoylphenyl)-3-(o-tolyl)-3,4-dihydro-2H-pyrrole-2-carboxylate (4e):**

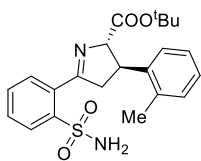

White solid (80.3 mg, 97%); m.p. = 167-169 °C;  $R_f$  = 0.25 (petroleum ether/ethyl acetate = 2:1); the enantiomeric excess was determined to be 94% by HPLC analysis on Daicel Chirapak IB column (hexane/isopropanol = 90/10, flow rate 1.0 mL/min, T = 30 °C), UV 254 nm,  $t_R$ (major) 25.895 min,

$t_R$ (minor) 19.701 min;  $[\alpha]_D^{25} = +18.31$  ( $c = 0.58$ ,  $\text{CH}_2\text{Cl}_2$ );  $^1\text{H NMR}$  (600 MHz,  $\text{CDCl}_3$ )  $\delta$  8.17 (d,  $J = 7.8$  Hz, 1H), 7.61 (t,  $J = 7.4$  Hz, 1H), 7.58 – 7.52 (m, 2H), 7.27 – 7.21 (m, 2H), 7.19 – 7.13 (m, 2H), 6.33 (s, 2H), 5.01 (d,  $J = 5.8$  Hz, 1H), 4.19 – 4.11 (m, 1H), 3.76 – 3.65 (m, 1H), 3.11 – 3.01 (m, 1H), 2.43 (s, 3H), 1.48 (s, 9H);  $^{13}\text{C NMR}$  (151 MHz,  $\text{CDCl}_3$ )  $\delta$  176.22, 170.74, 141.67, 141.21, 135.58, 133.19, 132.11, 130.46, 130.02, 129.42, 128.56, 127.03, 126.78, 126.01, 83.80, 82.42, 48.65, 41.08, 28.03, 19.98; **HRMS(ESI)**: calcd. for  $\text{C}_{22}\text{H}_{27}\text{N}_2\text{O}_4\text{S}$  ( $\text{M}+\text{H}$ ) $^+$ : 415.1686, found: 415.1686.

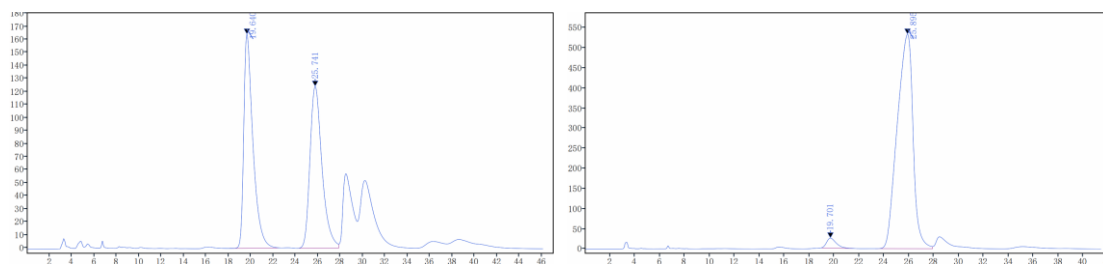

| Peak | RetTime [min] | Type | Width [min] | Area [mAU*s] | Height [mAU] | Area%   | Peak | RetTime [min] | Type | Width [min] | Area [mAU*s] | Height [mAU] | Area%   |
|------|---------------|------|-------------|--------------|--------------|---------|------|---------------|------|-------------|--------------|--------------|---------|
|      | 19.640        | BB   | 4.6250      | 9369.0812    | 164.1683     | 50.2207 |      | 19.701        | BB   | 2.9500      | 1339.4941    | 24.7269      | 2.7734  |
|      | 25.741        | BV   | 3.7054      | 9286.7350    | 124.1881     | 49.7793 |      | 25.895        | BV   | 4.5932      | 46958.0367   | 533.1515     | 97.2266 |

**tert-butyl (2S,3R)-3-(2-methoxyphenyl)-5-(2-sulfamoylphenyl)-3,4-dihydro-2H-pyrrole-2-carboxylate (4f):**

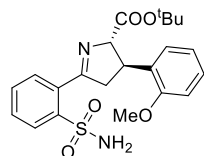

White solid (75.7 mg, 88%); m.p. = 148-150 °C;  $R_f = 0.26$  (petroleum ether/ethyl acetate = 2:1); the enantiomeric excess was determined to be 82% by HPLC analysis on Daicel Chirapak ID column (hexane/isopropanol = 70/30, flow rate 1.0 mL/min,  $T = 30$  °C), UV 254 nm,  $t_R$ (major) 12.510 min,  $t_R$ (minor) 19.032 min;  $[\alpha]_D^{25} = +5.07$  ( $c = 0.72$ ,  $\text{CH}_2\text{Cl}_2$ );  $^1\text{H NMR}$  (600 MHz,  $\text{CDCl}_3$ )  $\delta$  8.15 (d,  $J = 7.8$  Hz, 1H), 7.60 (t,  $J = 7.4$  Hz, 1H), 7.55 – 7.50 (m, 2H), 7.28 – 7.23 (m, 2H), 6.94 (t,  $J = 7.5$  Hz, 1H), 6.91 (d,  $J = 8.1$  Hz, 1H), 6.38 (s, 2H), 5.06 (d,  $J = 7.2$  Hz, 1H), 3.99 – 3.93 (m, 1H), 3.85 (s, 3H), 3.53 – 3.45 (m, 1H), 3.34 – 3.27 (m, 1H), 1.46 (s, 9H);  $^{13}\text{C NMR}$  (151 MHz,  $\text{CDCl}_3$ )  $\delta$  176.30, 171.47, 157.27, 141.17, 133.67, 132.02, 129.87, 129.76, 129.29, 128.47, 128.29, 120.76, 110.83, 81.95, 81.24, 55.17, 46.44, 42.95, 28.03; **HRMS(ESI)**: calcd. for  $\text{C}_{22}\text{H}_{27}\text{N}_2\text{O}_5\text{S}$  ( $\text{M}+\text{H}$ ) $^+$ : 431.1635, found: 431.1632.

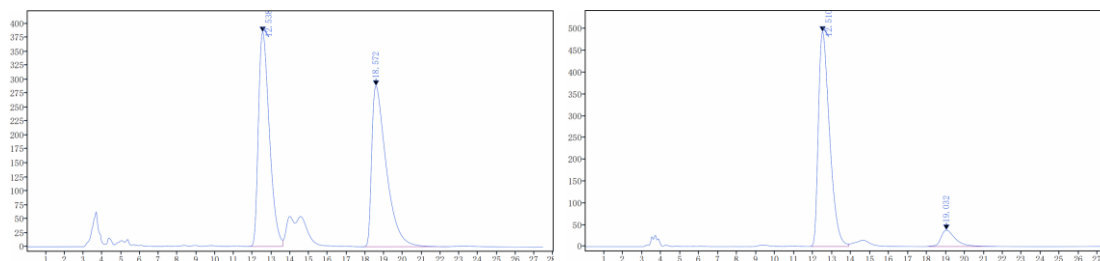

| Peak | RetTime [min] | Type | Width [min] | Area [mAU*s] | Height [mAU] | Area%   | Peak | RetTime [min] | Type | Width [min] | Area [mAU*s] | Height [mAU] | Area%   |
|------|---------------|------|-------------|--------------|--------------|---------|------|---------------|------|-------------|--------------|--------------|---------|
|      | 12.538        | BV   | 1.8670      | 15568.1018   | 383.8908     | 50.0978 |      | 12.510        | BM m | 0.6308      | 20225.1202   | 492.8299     | 90.9600 |
|      | 18.572        | BB   | 4.5683      | 15507.3471   | 288.0930     | 49.9022 |      | 19.032        | BM m | 0.7960      | 2010.0533    | 37.6418      | 9.0400  |

**tert-butyl (2S,3R)-3-(2-fluorophenyl)-5-(2-sulfamoylphenyl)-3,4-dihydro-2H-pyrrole-2-carboxylate (4g):**

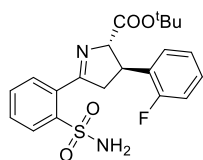

White solid (70.0 mg, 82%); m.p. = 145-147 °C;  $R_f$  = 0.33 (petroleum ether/ethyl acetate = 2:1); the enantiomeric excess was determined to be 91% by HPLC analysis on Daicel Chirapak IE column (hexane/isopropanol = 70/30, flow rate 1.0 mL/min, T = 30 °C), UV 254 nm,  $t_R$ (major) 23.814 min,  $t_R$ (minor) 31.253 min;  $[\alpha]_D^{25}$  = +18.31 (c = 0.58, CH<sub>2</sub>Cl<sub>2</sub>); <sup>1</sup>H NMR (600 MHz, CDCl<sub>3</sub>) δ 8.16 (d, J = 7.9 Hz, 1H), 7.61 (t, J = 7.5 Hz, 1H), 7.58 – 7.51 (m, 2H), 7.35 (t, J = 7.6 Hz, 1H), 7.29 – 7.23 (m, 1H), 7.15 (t, J = 7.5 Hz, 1H), 7.11 – 7.03 (m, 1H), 6.26 (s, 2H), 4.98 (d, J = 7.4 Hz, 1H), 4.08 – 3.99 (m, 1H), 3.65 – 3.56 (m, 1H), 3.27 – 3.181 (m, 1H), 1.47 (s, 9H); <sup>13</sup>C NMR (151 MHz, CDCl<sub>3</sub>) δ 176.27, 170.73, 161.64, 160.02, 141.14, 133.32, 132.11, 129.95, 129.51, 129.48, 129.18, 129.09, 128.77, 128.72, 128.48, 124.66, 124.64, 115.87, 115.72, 82.43, 81.93, 47.21, 40.76, 27.96; HRMS(ESI): calcd. for C<sub>21</sub>H<sub>24</sub>FN<sub>2</sub>O<sub>4</sub>S (M+H)<sup>+</sup>: 419.1435, found: 419.1432.

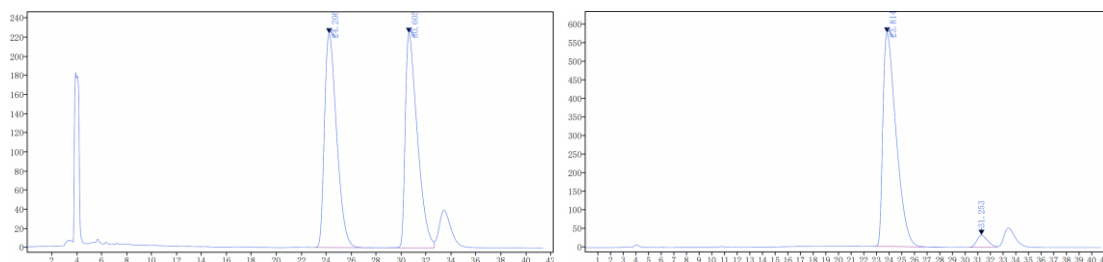

| Peak | RetTime [min] | Type | Width [min] | Area [mAU*s] | Height [mAU] | Area%   | Peak | RetTime [min] | Type | Width [min] | Area [mAU*s] | Height [mAU] | Area%   |
|------|---------------|------|-------------|--------------|--------------|---------|------|---------------|------|-------------|--------------|--------------|---------|
|      | 24.206        | BB   | 4.8000      | 15104.5294   | 223.4718     | 50.0856 |      | 23.814        | BB   | 5.3633      | 41424.2138   | 574.5140     | 95.5476 |
|      | 30.605        | BV   | 3.8735      | 15052.8892   | 224.2024     | 49.9144 |      | 31.253        | BV   | 2.3532      | 1930.3111    | 32.1402      | 4.4524  |

**tert-butyl (2S,3R)-3-(3-fluorophenyl)-5-(2-sulfamoylphenyl)-3,4-dihydro-2H-pyrrole-2-carboxylate (4h):**

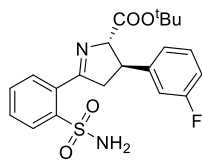

White solid (33.2 mg, 40%); m.p. = 135-138 °C;  $R_f$  = 0.20 (petroleum ether/ethyl acetate = 2:1); the enantiomeric excess was determined to be 91% by HPLC analysis on Daicel Chirapak ID column (hexane/isopropanol = 70/30, flow rate 1.0 mL/min, T = 30 °C), UV 254 nm,  $t_R$ (major) 10.421 min,  $t_R$ (minor) 17.672 min;  $[\alpha]_D^{25}$  = +24.56 (c = 0.26, CH<sub>2</sub>Cl<sub>2</sub>); <sup>1</sup>H NMR (600 MHz, CDCl<sub>3</sub>) δ 8.17 (d, J = 7.8 Hz, 1H), 7.62 (t, J = 7.5 Hz, 1H), 7.57 (t, J = 7.7 Hz, 1H), 7.54 (d, J = 7.5 Hz, 1H), 7.32 (dd, J = 14.1, 7.7 Hz, 1H), 7.11 (d, J = 7.6 Hz, 1H), 7.04 (d, J = 9.9 Hz, 1H), 6.96 (t, J = 8.4 Hz, 1H), 6.25 (s, 2H), 4.90 (d, J = 6.9 Hz, 1H), 3.92 – 3.81 (m, 1H), 3.70 – 3.62 (m, 1H), 3.21 – 3.11 (m, 1H), 1.48 (s, 9H); <sup>13</sup>C NMR (151 MHz, CDCl<sub>3</sub>) δ 176.11, 170.50, 163.85, 162.22, 145.12,

145.08, 141.20, 133.09, 132.14, 130.52, 130.47, 130.09, 129.19, 128.54, 122.97, 122.95, 114.43, 114.28, 114.08, 113.94, 83.28, 82.58, 48.36, 46.16, 46.16, 28.04; **HRMS(ESI)**: calcd. for  $C_{21}H_{24}FN_2O_4S$  (M+H)<sup>+</sup>: 419.1435, found: 419.1434.

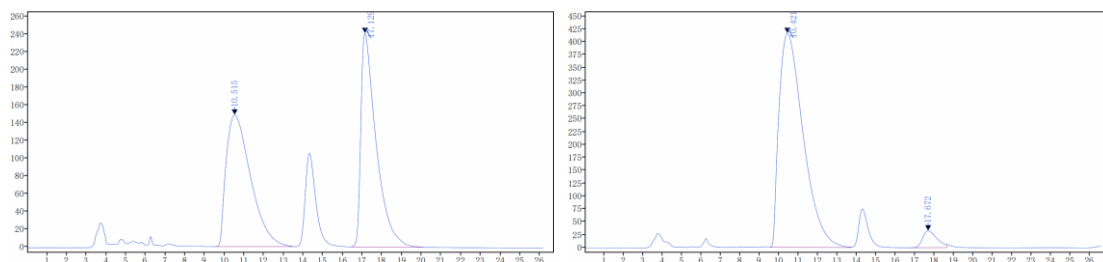

| Peak | RetTime [min] | Type | Width [min] | Area [mAU*s] | Height [mAU] | Area%   |
|------|---------------|------|-------------|--------------|--------------|---------|
|      | 10.515        | BB   | 4.2520      | 12792.4926   | 148.2454     | 49.6621 |
|      | 17.129        | BM m | 0.7768      | 12966.5768   | 240.5676     | 50.3379 |

| Peak | RetTime [min] | Type | Width [min] | Area [mAU*s] | Height [mAU] | Area%   |
|------|---------------|------|-------------|--------------|--------------|---------|
|      | 10.421        | VV   | 4.1886      | 36051.8688   | 416.4156     | 95.5347 |
|      | 17.672        | BM m | 0.7678      | 1685.0701    | 32.9973      | 4.4653  |

**tert-butyl (2S,3R)-3-(3-chlorophenyl)-5-(2-sulfamoylphenyl)-3,4-dihydro-2H-pyrrole-2-carboxylate (4i):**

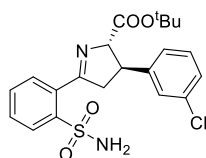

White solid (32.2 mg, 37%); m.p. = 109-112 °C;  $R_f$  = 0.21 (petroleum ether/ethyl acetate = 2:1); the enantiomeric excess was determined to be 87% by HPLC analysis on Daicel Chirapak IB column (hexane/isopropanol = 90/10, flow rate 1.0 mL/min, T = 30 °C), UV 254 nm,  $t_R$ (major) 18.705 min,  $t_R$ (minor) 21.935 min;  $[\alpha]_D^{25}$  = +17.32 (c = 0.26,  $CH_2Cl_2$ );  **$^1H$  NMR (600 MHz,  $CDCl_3$ )**  $\delta$  8.17 (d,  $J$  = 7.8 Hz, 1H), 7.62 (t,  $J$  = 7.3 Hz, 1H), 7.57 (t,  $J$  = 7.6 Hz, 1H), 7.54 (d,  $J$  = 7.5 Hz, 1H), 7.32 (s, 1H), 7.30 (t,  $J$  = 7.8 Hz, 1H), 7.25 (d,  $J$  = 8.1 Hz, 1H), 7.22 (d,  $J$  = 7.5 Hz, 1H), 6.25 (s, 2H), 4.89 (d,  $J$  = 7.0 Hz, 1H), 3.88 – 3.80 (m, 1H), 3.70 – 3.60 (m, 1H), 3.20 – 3.11 (m, 1H), 1.48 (s, 9H);  **$^{13}C$  NMR (151 MHz,  $CDCl_3$ )**  $\delta$  176.09, 170.46, 144.55, 141.20, 134.60, 133.06, 132.15, 130.28, 130.10, 129.19, 128.55, 127.65, 127.28, 125.49, 83.24, 82.61, 48.30, 46.13, 28.04; **HRMS(ESI)**: calcd. for  $C_{21}H_{24}ClN_2O_4S$  (M+H)<sup>+</sup>: 435.1140, found: 435.1139.

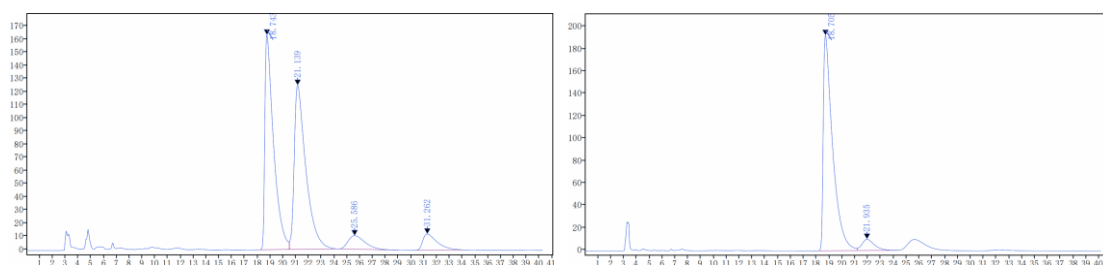

| Peak | RetTime [min] | Type | Width [min] | Area [mAU*s] | Height [mAU] | Area%   |
|------|---------------|------|-------------|--------------|--------------|---------|
|      | 18.743        | MM m | 0.6811      | 7750.2468    | 163.4857     | 44.1368 |
|      | 21.139        | MB m | 0.9353      | 7896.1170    | 124.9437     | 44.9672 |
|      | 25.586        | BB   | 4.7267      | 950.6403     | 10.2805      | 5.4138  |
|      | 31.262        | BM m | 1.1099      | 962.5919     | 12.3016      | 5.4815  |

| Peak | RetTime [min] | Type | Width [min] | Area [mAU*s] | Height [mAU] | Area%   |
|------|---------------|------|-------------|--------------|--------------|---------|
|      | 18.705        | MM m | 0.7225      | 9753.5554    | 192.7007     | 93.4988 |
|      | 21.935        | MM m | 0.9704      | 678.1850     | 10.1122      | 6.5012  |

**tert-butyl (2S,3R)-5-(2-sulfamoylphenyl)-3-(m-tolyl)-3,4-dihydro-2H-pyrrole-2-carboxylate (4j):**

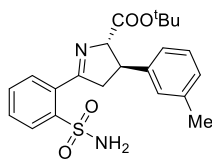

White solid (74.8 mg, 90%); m.p. = 112-114 °C;  $R_f$  = 0.24 (petroleum ether/ethyl acetate = 2:1); the enantiomeric excess was determined to be 93% by HPLC analysis on Daicel Chirapak IB column (hexane/isopropanol = 90/10, flow rate 1.0 mL/min, T = 30 °C), UV 254 nm,  $t_R$ (major) 14.566 min,  $t_R$ (minor) 22.791 min;  $[\alpha]_D^{25}$  = +28.05 (c = 0.59, CH<sub>2</sub>Cl<sub>2</sub>); **<sup>1</sup>H NMR (600 MHz, CDCl<sub>3</sub>)** δ 8.17 (d,  $J$  = 8.0 Hz, 1H), 7.64 – 7.59 (m, 1H), 7.58 – 7.52 (m, 2H), 7.24 (t,  $J$  = 7.6 Hz, 1H), 7.14 (s, 1H), 7.11 (d,  $J$  = 7.8 Hz, 1H), 7.08 (d,  $J$  = 7.6 Hz, 1H), 6.30 (s, 2H), 4.95 – 4.87 (m, 1H), 3.86 – 3.77 (m, 1H), 3.68 – 3.60 (m, 1H), 3.21 – 3.11 (m, 1H), 2.36 (s, 3H), 1.48 (s, 9H); **<sup>13</sup>C NMR (151 MHz, CDCl<sub>3</sub>)** δ 176.26, 170.83, 142.61, 141.20, 138.60, 133.26, 132.10, 129.99, 129.32, 128.81, 128.53, 128.05, 127.79, 124.29, 83.53, 82.30, 48.52, 46.32, 28.05, 21.46; **HRMS(ESI)**: calcd. for C<sub>22</sub>H<sub>27</sub>N<sub>2</sub>O<sub>4</sub>S (M+H)<sup>+</sup>: 415.1686, found: 415.1683.

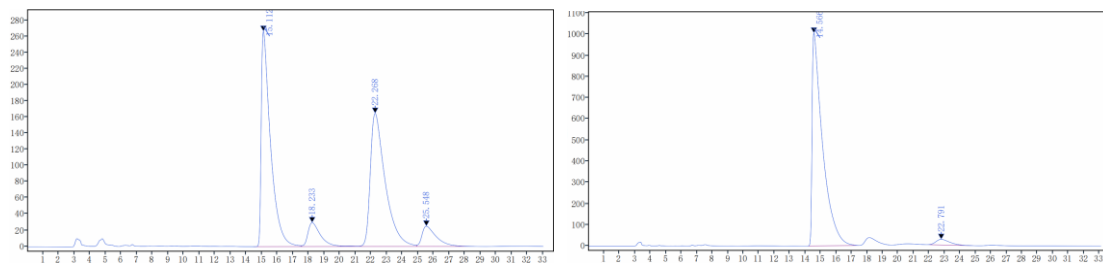

| Peak   | RetTime [min] | Type   | Width[min] | Area[mAU*s] | Height[mAU] | Area% |
|--------|---------------|--------|------------|-------------|-------------|-------|
| 15.112 | MM m          | 0.5946 | 11016.0359 | 266.8354    | 43.6896     |       |
| 18.233 | MM m          | 0.8139 | 1635.2939  | 29.6275     | 6.4856      |       |
| 22.268 | MM m          | 0.9815 | 10958.6766 | 165.0795    | 43.4621     |       |
| 25.548 | MM m          | 0.9241 | 1604.3410  | 25.1555     | 6.3628      |       |

  

| Peak   | RetTime [min] | Type   | Width[min] | Area[mAU*s] | Height[mAU] | Area% |
|--------|---------------|--------|------------|-------------|-------------|-------|
| 14.566 | BV            | 3.3642 | 47208.5336 | 1005.1936   | 96.6057     |       |
| 22.791 | BB            | 3.0367 | 1658.7021  | 26.3742     | 3.3943      |       |

**tert-butyl (2S,3R)-3-(3-methoxyphenyl)-5-(2-sulfamoylphenyl)-3,4-dihydro-2H-pyrrole-2-carboxylate (4k):**

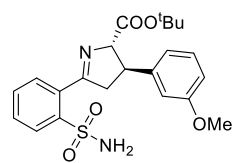

Colorless oil (66.6 mg, 77%);  $R_f$  = 0.21 (petroleum ether/ethyl acetate = 2:1); the enantiomeric excess was determined to be 90% by HPLC analysis on Daicel Chirapak IE column (hexane/isopropanol = 70/30, flow rate 1.0 mL/min, T = 30 °C), UV 254 nm,  $t_R$ (major) 17.350 min,  $t_R$ (minor) 26.127 min;  $[\alpha]_D^{25}$  = +30.46 (c = 0.52, CH<sub>2</sub>Cl<sub>2</sub>); **<sup>1</sup>H NMR (600 MHz, CDCl<sub>3</sub>)** δ 8.16 (d,  $J$  = 7.8 Hz, 1H), 7.62 (t,  $J$  = 7.4 Hz, 1H), 7.58 – 7.52 (m, 2H), 7.26 (t,  $J$  = 7.9 Hz, 1H), 6.90 (d,  $J$  = 7.6 Hz, 1H), 6.87 (s, 1H), 6.83 – 6.78 (m, 1H), 6.29 (s, 2H), 4.94 (d,  $J$  = 6.6 Hz, 1H), 3.86 – 3.78 (m, 4H), 3.71 – 3.61 (m, 1H), 3.20 – 3.11 (m, 1H), 1.48 (s, 9H); **<sup>13</sup>C NMR (151 MHz, CDCl<sub>3</sub>)** δ 176.26, 170.76, 160.09, 144.48, 141.18, 133.21, 132.12, 130.01, 129.90, 129.29, 128.50, 119.55, 112.80, 112.56, 83.59, 82.35, 55.34, 48.53, 46.31, 28.05; **HRMS(ESI)**: calcd. for C<sub>22</sub>H<sub>27</sub>N<sub>2</sub>O<sub>5</sub>S (M+H)<sup>+</sup>: 431.1635, found: 431.1634.



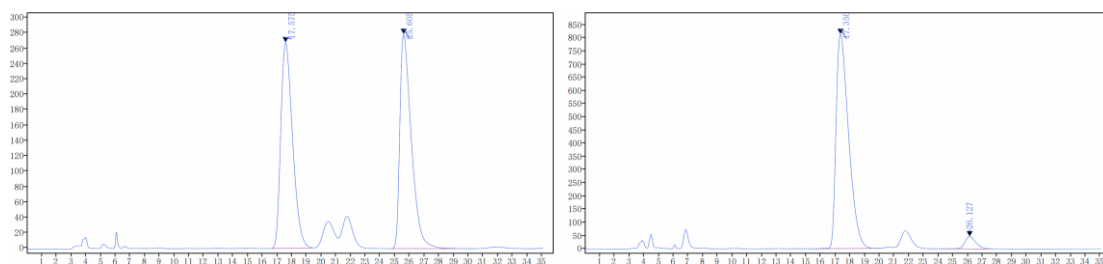

| Peak | RetTime [min] | Type | Width[min] | Area[mAU*s] | Height[mAU] | Area%   | Peak | RetTime [min] | Type | Width[min] | Area[mAU*s] | Height[mAU] | Area%   |
|------|---------------|------|------------|-------------|-------------|---------|------|---------------|------|------------|-------------|-------------|---------|
|      | 17.575        | BB   | 3.0604     | 14862.1862  | 267.7177    | 49.5207 |      | 17.350        | MM m | 0.9156     | 48027.9143  | 813.7352    | 95.1982 |
|      | 25.605        | BB   | 5.9050     | 15149.8783  | 278.9757    | 50.4793 |      | 26.127        | BB   | 4.9933     | 2422.5134   | 46.3848     | 4.8018  |

**tert-butyl (2S,3R)-3-(4-fluorophenyl)-5-(2-sulfamoylphenyl)-3,4-dihydro-2H-pyrrole-2-carboxylate (4l):**

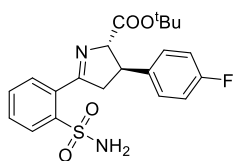

White solid (47.2 mg, 56%); m.p. = 148-150 °C;  $R_f$  = 0.19 (petroleum ether/ethyl acetate = 2:1); the enantiomeric excess was determined to be 92% by HPLC analysis on Daicel Chirapak ID column (hexane/isopropanol = 80/20, flow rate 1.0 mL/min, T = 30 °C), UV 220 nm,  $t_R$ (major) 19.693 min,  $t_R$ (minor) 34.195 min;  $[\alpha]_D^{25}$  = +28.26 (c = 0.39, CH<sub>2</sub>Cl<sub>2</sub>); <sup>1</sup>H NMR (600 MHz, CDCl<sub>3</sub>) δ 8.17 (d,  $J$  = 7.8 Hz, 1H), 7.62 (t,  $J$  = 7.5 Hz, 1H), 7.59 – 7.51 (m, 2H), 7.32 – 7.27 (m, 2H), 7.04 (t,  $J$  = 8.6 Hz, 2H), 6.26 (s, 2H), 4.87 (d,  $J$  = 6.9 Hz, 1H), 3.88 – 3.80 (m, 1H), 3.70 – 3.62 (m, 1H), 3.17 – 3.07 (m, 1H), 1.47 (s, 9H); <sup>13</sup>C NMR (151 MHz, CDCl<sub>3</sub>) δ 176.21, 170.63, 162.68, 161.05, 141.17, 138.29, 138.27, 133.14, 132.13, 130.07, 129.22, 128.86, 128.81, 128.53, 115.81, 115.67, 83.53, 82.44, 48.58, 45.80, 28.04; HRMS(ESI): calcd. for C<sub>21</sub>H<sub>24</sub>FN<sub>2</sub>O<sub>4</sub>S (M+H)<sup>+</sup>: 419.1435, found: 419.1433.

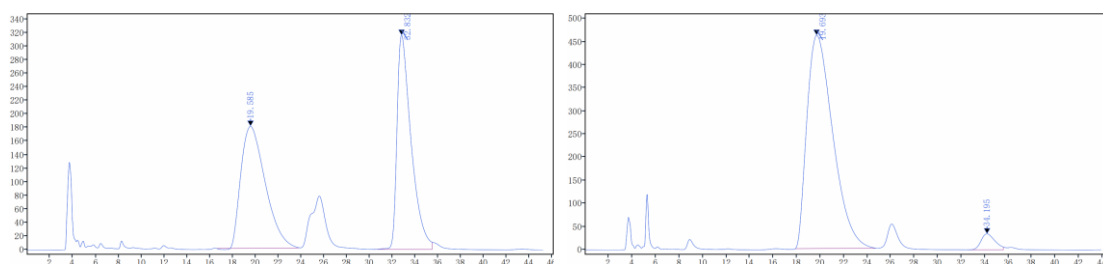

| Peak | RetTime [min] | Type | Width[min] | Area[mAU*s] | Height[mAU] | Area%   | Peak | RetTime [min] | Type | Width[min] | Area[mAU*s] | Height[mAU] | Area%   |
|------|---------------|------|------------|-------------|-------------|---------|------|---------------|------|------------|-------------|-------------|---------|
|      | 19.585        | MB m | 2.1757     | 26628.3586  | 179.8148    | 49.4961 |      | 19.693        | BB   | 7.0183     | 70768.5179  | 461.3932    | 96.1490 |
|      | 32.832        | BM m | 1.2723     | 27170.5105  | 315.6315    | 50.5039 |      | 34.195        | MM m | 1.2467     | 2834.4845   | 34.4203     | 3.8510  |

**tert-butyl (2S,3R)-3-(4-chlorophenyl)-5-(2-sulfamoylphenyl)-3,4-dihydro-2H-pyrrole-2-carboxylate (4m):**

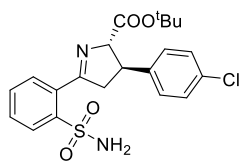

White solid (53.0 mg, 61%); m.p. = 140-144 °C;  $R_f$  = 0.21 (petroleum ether/ethyl acetate = 2:1); the enantiomeric excess was determined to be 90% by HPLC analysis on Daicel Chirapak ID column (hexane/isopropanol = 80/20, flow rate 1.0 mL/min, T = 30 °C), UV 220

nm,  $t_R$ (major) 19.969 min,  $t_R$ (minor) 36.705 min;  $[\alpha]_D^{25} = +28.09$  ( $c = 0.41$ ,  $\text{CH}_2\text{Cl}_2$ );  $^1\text{H NMR}$  (600 MHz,  $\text{CDCl}_3$ )  $\delta$  8.16 (d,  $J = 7.8$  Hz, 1H), 7.62 (t,  $J = 7.5$  Hz, 1H), 7.56 (t,  $J = 7.6$  Hz, 1H), 7.53 (d,  $J = 7.5$  Hz, 1H), 7.34–7.30 (m, 2H), 7.29–7.24 (m, 2H), 6.26 (s, 2H), 4.87 (d,  $J = 6.9$  Hz, 1H), 3.88–3.78 (m, 1H), 3.69–3.60 (m, 1H), 3.17–3.06 (m, 1H), 1.47 (s, 9H);  $^{13}\text{C NMR}$  (151 MHz,  $\text{CDCl}_3$ )  $\delta$  176.14, 170.53, 141.18, 141.07, 133.07, 132.86, 132.14, 130.10, 129.21, 129.05, 128.72, 128.53, 83.41, 82.53, 48.47, 45.88, 28.05; **HRMS(ESI)**: calcd. for  $\text{C}_{21}\text{H}_{24}\text{ClN}_2\text{O}_4\text{S}$  ( $\text{M}+\text{H}$ ) $^+$ : 435.1140, found: 435.1138.

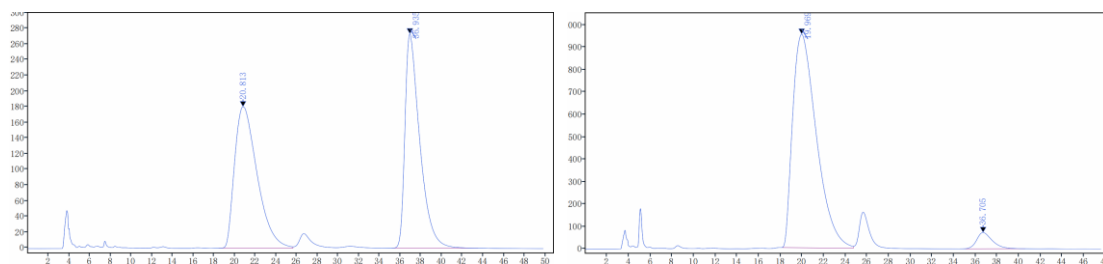

| Peak | RetTime [min] | Type | Width[min] | Area[mAU*s] | Height[mAU] | Area%   | Peak | RetTime [min] | Type | Width[min] | Area[mAU*s] | Height[mAU] | Area%   |
|------|---------------|------|------------|-------------|-------------|---------|------|---------------|------|------------|-------------|-------------|---------|
|      | 20.813        | MM m | 2.2649     | 27241.4074  | 180.0786    | 50.1189 |      | 19.969        | BV   | 6.6768     | 144864.0537 | 952.2621    | 95.2023 |
|      | 36.935        | BB   | 8.3467     | 27112.1619  | 273.0226    | 49.8811 |      | 36.705        | MM m | 1.4851     | 7300.3393   | 72.2357     | 4.7977  |

**tert-butyl (2S,3R)-3-(4-bromophenyl)-5-(2-sulfamoylphenyl)-3,4-dihydro-2H-pyrrole-2-carboxylate (4n):**

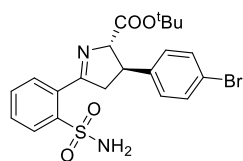

White solid (50.3 mg, 53%); m.p. = 143-145 °C;  $R_f = 0.21$  (petroleum ether/ethyl acetate = 2:1); the enantiomeric excess was determined to be 90% by HPLC analysis on Daicel Chirapak ID column (hexane/isopropanol = 80/20, flow rate 1.0 mL/min,  $T = 30$  °C), UV 220

nm,  $t_R$ (major) 20.245 min,  $t_R$ (minor) 37.980 min;  $[\alpha]_D^{25} = +23.31$  ( $c = 0.36$ ,  $\text{CH}_2\text{Cl}_2$ );  $^1\text{H NMR}$  (600 MHz,  $\text{CDCl}_3$ )  $\delta$  8.19–8.13 (m, 1H), 7.65–7.60 (m, 1H), 7.58–7.55 (m, 1H), 7.55–7.51 (m, 1H), 7.50–7.45 (m, 2H), 7.24–7.16 (m, 2H), 6.24 (s, 2H), 4.90–4.82 (m, 1H), 3.87–3.78 (m, 1H), 3.69–3.62 (m, 1H), 3.15–3.08 (m, 1H), 1.48 (s, 9H);  $^{13}\text{C NMR}$  (151 MHz,  $\text{CDCl}_3$ )  $\delta$  176.13, 170.51, 141.61, 141.17, 133.05, 132.15, 132.01, 130.11, 129.21, 129.09, 128.54, 120.91, 83.37, 82.56, 48.43, 45.92, 28.05; **HRMS(ESI)**: calcd. for  $\text{C}_{21}\text{H}_{24}\text{BrN}_2\text{O}_4\text{S}$  ( $\text{M}+\text{H}$ ) $^+$ : 479.0635, found: 479.0633.

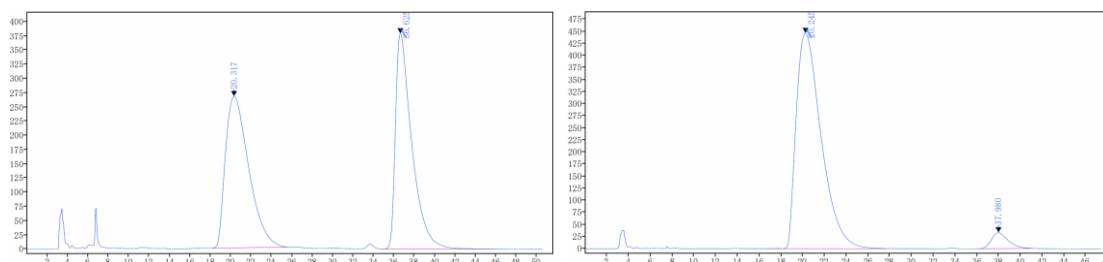

| Peak | RetTime [min] | Type | Width[min] | Area[mAU*s] | Height[mAU] | Area%   | Peak | RetTime [min] | Type | Width[min] | Area[mAU*s] | Height[mAU] | Area%   |
|------|---------------|------|------------|-------------|-------------|---------|------|---------------|------|------------|-------------|-------------|---------|
|      | 20.317        | BB   | 7.7467     | 42257.0251  | 266.2135    | 50.0766 |      | 20.245        | MM m | 2.5017     | 71348.7626  | 446.1725    | 95.2471 |
|      | 36.625        | BB   | 12.5133    | 42127.6720  | 378.7731    | 49.9234 |      | 37.980        | MM m | 1.6104     | 3560.3659   | 32.9551     | 4.7529  |

**tert-butyl (2S,3R)-3-(4-cyanophenyl)-5-(2-sulfamoylphenyl)-3,4-dihydro-2H-pyrrole-2-carboxylate (4o):**

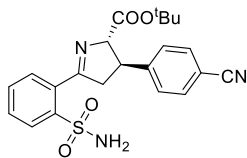

White solid (74.1 mg, 87%); m.p. = 175-177 °C;  $R_f$  = 0.25 (petroleum ether/ethyl acetate = 3:2); the enantiomeric excess was determined to be 80% by HPLC analysis on Daicel Chirapak IC column (hexane/isopropanol = 70/30, flow rate 1.0 mL/min, T = 30 °C), UV 220 nm,  $t_R$ (major) 74.437 min,  $t_R$ (minor) 51.344 min;  $[\alpha]_D^{25}$  = +27.36 (c = 0.57, CH<sub>2</sub>Cl<sub>2</sub>); <sup>1</sup>H NMR (600 MHz, CDCl<sub>3</sub>) δ 8.16 (d, *J* = 7.8 Hz, 1H), 7.67 – 7.61 (m, 3H), 7.61 – 7.56 (m, 1H), 7.54 (d, *J* = 7.5 Hz, 1H), 7.46 (d, *J* = 8.2 Hz, 2H), 6.23 (s, 2H), 4.91 (d, *J* = 6.9 Hz, 1H), 3.95 – 3.88 (m, 1H), 3.74 – 3.66 (m, 1H), 3.19 – 3.11 (m, 1H), 1.48 (s, 9H); <sup>13</sup>C NMR (151 MHz, CDCl<sub>3</sub>) δ 175.93, 170.13, 148.10, 141.18, 132.78, 132.22, 130.26, 129.16, 128.58, 128.29, 118.68, 111.06, 83.29, 82.83, 48.33, 46.40, 28.03; HRMS(ESI): calcd. for C<sub>22</sub>H<sub>24</sub>N<sub>3</sub>O<sub>4</sub>S (M+H)<sup>+</sup>: 426.1482, found: 426.1487.

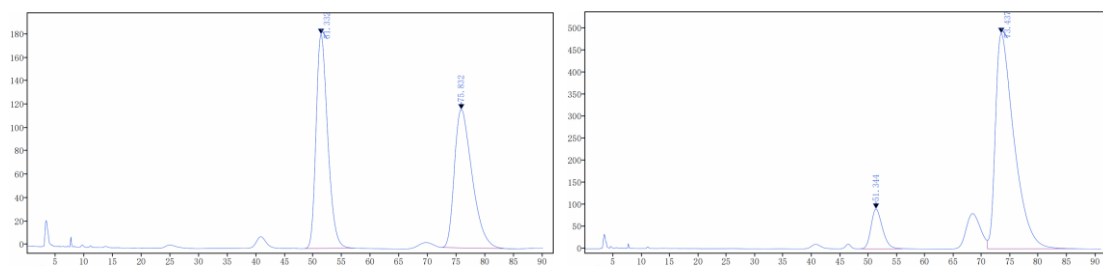

| Peak | RetTime [min] | Type | Width[min] | Area[mAU*s] | Height[mAU] | Area%   | Peak | RetTime [min] | Type | Width[min] | Area[mAU*s] | Height[mAU] | Area%   |
|------|---------------|------|------------|-------------|-------------|---------|------|---------------|------|------------|-------------|-------------|---------|
|      | 51.332        | BM m | 2.1740     | 25910.3804  | 183.0949    | 50.4758 |      | 51.344        | MM m | 2.0938     | 12555.3990  | 89.9849     | 10.1347 |
|      | 75.832        | BM m | 2.9113     | 25421.8677  | 118.1502    | 49.5242 |      | 73.437        | MM m | 3.2126     | 111330.1629 | 487.6359    | 89.8653 |

**tert-butyl (2S,3R)-3-(4-nitrophenyl)-5-(2-sulfamoylphenyl)-3,4-dihydro-2H-pyrrole-2-carboxylate (4p):**

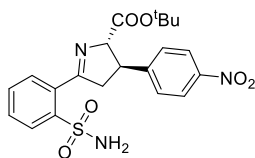

White solid (52.6 mg, 59%); m.p. = 182-185 °C;  $R_f$  = 0.22 (petroleum ether/ethyl acetate = 2:1); the enantiomeric excess was determined to be 77% by HPLC analysis on Daicel Chirapak AD-H column (hexane/isopropanol = 80/20, flow rate 1.0 mL/min, T = 30 °C), UV 220 nm,  $t_R$ (major) 28.506 min,  $t_R$ (minor) 44.724 min;  $[\alpha]_D^{25}$  = +20.55 (c = 0.45, CH<sub>2</sub>Cl<sub>2</sub>); <sup>1</sup>H NMR (600 MHz, CDCl<sub>3</sub>) δ 8.22 (d, *J* = 8.7 Hz, 2H), 8.17 (d, *J* = 7.8 Hz, 1H), 7.67 – 7.62 (m, 1H), 7.62 – 7.57 (m, 1H), 7.55 (d, *J* = 7.5 Hz, 1H), 7.52 (d, *J* = 8.7 Hz, 2H), 6.22 (s, 2H), 4.93 (d, *J* = 6.9 Hz, 1H), 4.04 – 3.93 (m, 1H), 3.79 – 3.67 (m, 1H), 3.24 – 3.13 (m, 1H), 1.48 (s, 9H); <sup>13</sup>C NMR (151 MHz, CDCl<sub>3</sub>) δ 175.90, 170.06, 150.13, 147.08, 141.20, 132.76, 132.23, 130.29, 129.15, 128.59,

128.38, 124.23, 83.30, 82.92, 48.39, 46.19, 28.04; **HRMS(ESI)**: calcd. for C<sub>21</sub>H<sub>24</sub>N<sub>3</sub>O<sub>6</sub>S (M+H)<sup>+</sup>: 446.1380, found: 446.1379.

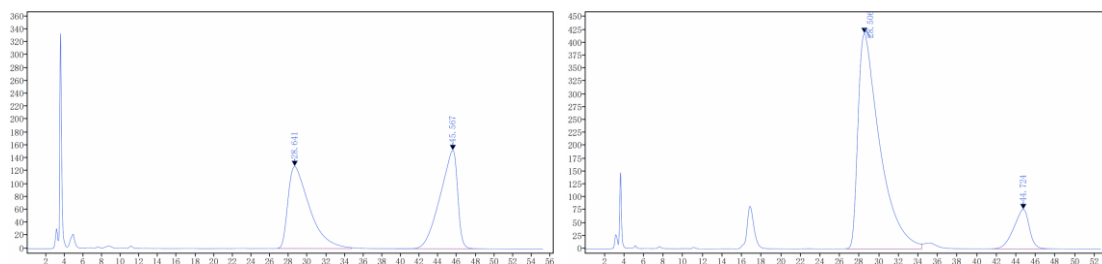

| Peak | RetTime [min] | Type | Width [min] | Area [mAU*s] | Height [mAU] | Area%   | Peak | RetTime [min] | Type | Width [min] | Area [mAU*s] | Height [mAU] | Area%   |
|------|---------------|------|-------------|--------------|--------------|---------|------|---------------|------|-------------|--------------|--------------|---------|
|      | 28.641        | MM m | 2.2550      | 20427.7633   | 127.5852     | 50.6616 |      | 28.506        | MM m | 2.1911      | 64379.8702   | 418.4072     | 88.4063 |
|      | 45.567        | MM m | 1.8333      | 19894.2111   | 152.6670     | 49.3384 |      | 44.724        | MM m | 1.5727      | 8442.8866    | 76.3748      | 11.5937 |

**tert-butyl (2S,3R)-5-(2-sulfamoylphenyl)-3-(p-tolyl)-3,4-dihydro-2H-pyrrole-2-carboxylate (4q):**

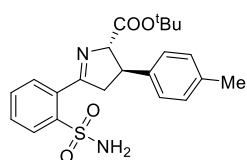

White solid (82.7 mg, >99%); m.p. = 126-128 °C; R<sub>f</sub> = 0.27 (petroleum ether/ethyl acetate = 2:1); the enantiomeric excess was determined to be 94% by HPLC analysis on Daicel Chirapak ID column (hexane/isopropanol = 80/20, flow rate 0.8 mL/min, T = 30 °C), UV 220 nm, t<sub>R</sub>(major) 24.550 min, t<sub>R</sub>(minor) 46.225 min; [α]<sub>D</sub><sup>25</sup> = +28.01 (c = 0.70, CH<sub>2</sub>Cl<sub>2</sub>); **<sup>1</sup>H NMR (600 MHz, CDCl<sub>3</sub>)** δ 8.16 (d, J = 7.7 Hz, 1H), 7.64 – 7.58 (m, 1H), 7.57 – 7.51 (m, 2H), 7.21 (d, J = 8.0 Hz, 2H), 7.16 (d, J = 7.9 Hz, 2H), 6.30 (s, 2H), 4.94 – 4.84 (m, 1H), 3.86 – 3.78 (m, 1H), 3.67 – 3.60 (m, 1H), 3.18 – 3.10 (m, 1H), 2.34 (s, 3H), 1.47 (s, 9H); **<sup>13</sup>C NMR (151 MHz, CDCl<sub>3</sub>)** δ 176.30, 170.87, 141.17, 139.57, 136.68, 133.30, 132.10, 129.97, 129.58, 129.29, 128.51, 127.17, 83.54, 82.29, 48.56, 46.08, 28.05, 21.05; **HRMS(ESI)**: calcd. for C<sub>22</sub>H<sub>27</sub>N<sub>2</sub>O<sub>4</sub>S (M+H)<sup>+</sup>: 415.1686, found: 415.1686.

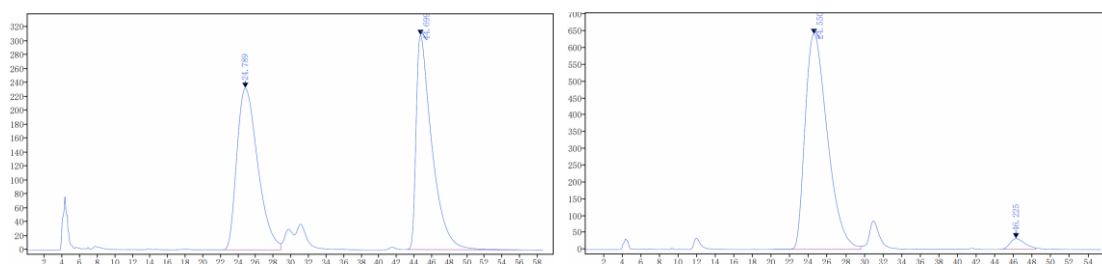

| Peak | RetTime [min] | Type | Width [min] | Area [mAU*s] | Height [mAU] | Area%   | Peak | RetTime [min] | Type | Width [min] | Area [mAU*s] | Height [mAU] | Area%   |
|------|---------------|------|-------------|--------------|--------------|---------|------|---------------|------|-------------|--------------|--------------|---------|
|      | 24.789        | BV   | 6.7745      | 38228.5549   | 232.1230     | 49.9676 |      | 24.550        | MM m | 2.5463      | 106481.5542  | 640.5940     | 96.8105 |
|      | 44.699        | BB   | 15.6633     | 38278.0584   | 307.7132     | 50.0324 |      | 46.225        | MM m | 1.6462      | 3508.1160    | 31.2846      | 3.1895  |

**tert-butyl (2S,3R)-3-([1,1'-biphenyl]-4-yl)-5-(2-sulfamoylphenyl)-3,4-dihydro-2H-pyrrole-2-carboxylate (4r):**

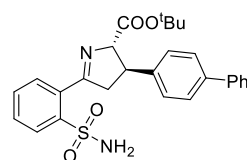

White solid (90.3 mg, 95%); m.p. = 178-180 °C; R<sub>f</sub> = 0.27 (petroleum ether/ethyl acetate = 2:1); the enantiomeric excess was determined to be

92% by HPLC analysis on Daicel Chirapak IE column (hexane/isopropanol = 80/20, flow rate 1.0 mL/min, T = 30 °C), UV 254 nm,  $t_R$ (major) 41.688 min,  $t_R$ (minor) 67.374 min;  $[\alpha]_D^{25} = +24.25$  (c = 0.76, CH<sub>2</sub>Cl<sub>2</sub>); <sup>1</sup>H NMR (600 MHz, CDCl<sub>3</sub>) δ 8.18 (d, J = 7.8 Hz, 1H), 7.64 – 7.54 (m, 7H), 7.44 (t, J = 7.7 Hz, 2H), 7.40 (d, J = 8.1 Hz, 2H), 7.35 (t, J = 7.4 Hz, 1H), 6.29 (s, 2H), 4.97 (d, J = 6.9 Hz, 1H), 3.96 – 3.86 (m, 1H), 3.73 – 3.64 (m, 1H), 3.26 – 3.15 (m, 1H), 1.49 (s, 9H); <sup>13</sup>C NMR (151 MHz, CDCl<sub>3</sub>) δ 176.26, 170.76, 141.69, 141.20, 140.67, 140.04, 133.23, 132.14, 130.05, 129.30, 128.83, 128.55, 127.76, 127.63, 127.35, 127.04, 83.53, 82.44, 48.54, 46.11, 28.08; HRMS(ESI): calcd. for C<sub>27</sub>H<sub>29</sub>N<sub>2</sub>O<sub>4</sub>S (M+H)<sup>+</sup>: 477.1843, found: 477.1842.

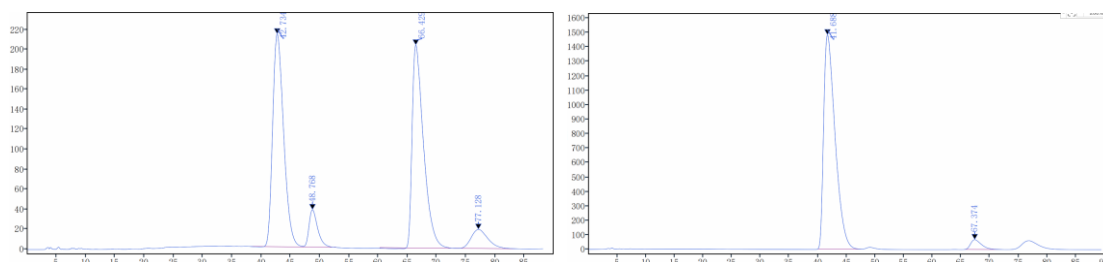

| Peak   | RetTime [min] | Type | Width[min] | Area[mAU*s] | Height[mAU] | Area%   |
|--------|---------------|------|------------|-------------|-------------|---------|
| 42.734 | 42.734        | MM m | 2.0166     | 27787.5894  | 212.9185    | 44.3996 |
| 48.768 | 48.768        | MM m | 1.5008     | 3814.1765   | 37.3049     | 6.0944  |
| 66.429 | 66.429        | MM m | 1.8676     | 27204.4788  | 202.9786    | 43.4678 |
| 77.128 | 77.128        | MM m | 2.4377     | 3779.0471   | 19.0392     | 6.0382  |

  

| Peak   | RetTime [min] | Type | Width[min] | Area[mAU*s] | Height[mAU] | Area%   |
|--------|---------------|------|------------|-------------|-------------|---------|
| 41.688 | 41.688        | BB   | 7.6033     | 204916.7819 | 1478.9258   | 95.9217 |
| 67.374 | 67.374        | BM m | 1.9280     | 8712.4889   | 67.3152     | 4.0783  |

**tert-butyl (2S,3R)-3-(4-methoxyphenyl)-5-(2-sulfamoylphenyl)-3,4-dihydro-2H-pyrrole-2-carboxylate (4s):**

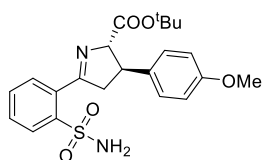

Pale yellow solid (65.4 mg, 76%); m.p. = 133-136 °C; R<sub>f</sub> = 0.25 (petroleum ether/ethyl acetate = 2:1); the enantiomeric excess was determined to be 92% by HPLC analysis on Daicel Chirapak ID column (hexane/isopropanol = 80/20, flow rate 1.0 mL/min, T = 30 °C), UV 254 nm,  $t_R$ (major) 29.487 min,  $t_R$ (minor) 55.798 min;  $[\alpha]_D^{25} = +31.99$  (c = 0.523, CH<sub>2</sub>Cl<sub>2</sub>); <sup>1</sup>H NMR (600 MHz, CDCl<sub>3</sub>) δ 8.16 (d, J = 7.8 Hz, 1H), 7.61 (t, J = 7.5 Hz, 1H), 7.57 – 7.51 (m, 2H), 7.24 (d, J = 8.6 Hz, 2H), 6.89 (d, J = 8.6 Hz, 2H), 6.30 (s, 2H), 4.87 (d, J = 6.9 Hz, 1H), 3.83 – 3.78 (m, 4H), 3.67 – 3.60 (m, 1H), 3.16 – 3.07 (m, 1H), 1.48 (s, 9H); <sup>13</sup>C NMR (151 MHz, CDCl<sub>3</sub>) δ 176.34, 170.89, 158.62, 141.15, 134.60, 133.29, 132.10, 129.97, 129.29, 128.50, 128.30, 114.28, 83.56, 82.26, 55.33, 48.56, 45.79, 28.06; HRMS(ESI): calcd. for C<sub>22</sub>H<sub>27</sub>N<sub>2</sub>O<sub>5</sub>S (M+H)<sup>+</sup>: 431.1635, found: 431.1634.

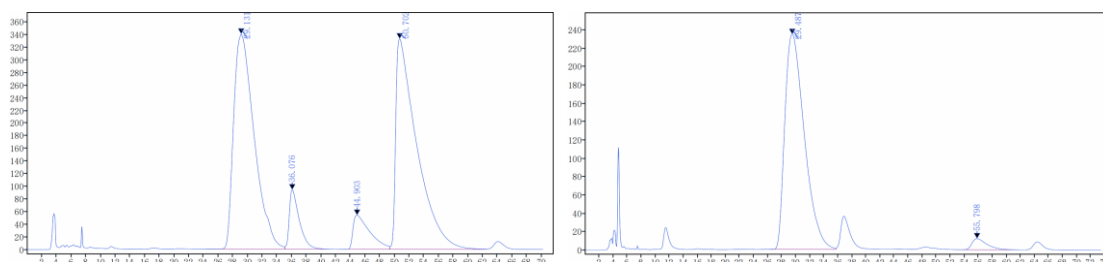

| Peak   | RetTime [min] | Type   | Width[min] | Area[mAU*s] | Height[mAU] | Area% |
|--------|---------------|--------|------------|-------------|-------------|-------|
| 29.131 | MM m          | 2.3256 | 66039.4017 | 340.5227    | 44.1715     |       |
| 36.076 | MM m          | 1.3763 | 8869.5204  | 93.9564     | 5.9325      |       |
| 44.903 | MM m          | 2.0708 | 8467.2980  | 53.8116     | 5.6635      |       |
| 50.702 | MM m          | 2.5641 | 66130.5004 | 333.2544    | 44.2325     |       |

  

| Peak   | RetTime [min] | Type   | Width[min] | Area[mAU*s] | Height[mAU] | Area% |
|--------|---------------|--------|------------|-------------|-------------|-------|
| 29.487 | MM m          | 2.8350 | 45339.8401 | 234.5704    | 96.2231     |       |
| 55.798 | MM m          | 1.9464 | 1779.6725  | 12.0478     | 3.7769      |       |

**tert-butyl (2S,3R)-3-(4-(benzyloxy)phenyl)-5-(2-sulfamoylphenyl)-3,4-dihydro-2H-pyrrole-2-carboxylate (4t):**

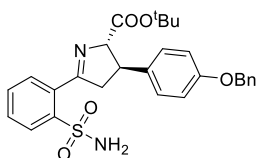

White solid (83.7 mg, 83%); m.p. = 159-162 °C;  $R_f$  = 0.23 (petroleum ether/ethyl acetate = 2:1); the enantiomeric excess was determined to be 92% by HPLC analysis on Daicel Chirapak IG column (hexane/isopropanol = 70/30, flow rate 1.0 mL/min, T = 30 °C), UV 220

nm,  $t_R$ (major) 14.361 min,  $t_R$ (minor) 21.144 min;  $[\alpha]_D^{25}$  = +28.01 (c = 0.73, CH<sub>2</sub>Cl<sub>2</sub>); <sup>1</sup>H NMR (600 MHz, CDCl<sub>3</sub>) δ 8.16 (d, *J* = 7.8 Hz, 1H), 7.61 (t, *J* = 7.4 Hz, 1H), 7.57 – 7.51 (m, 2H), 7.43 (d, *J* = 7.4 Hz, 2H), 7.38 (t, *J* = 7.5 Hz, 2H), 7.32 (t, *J* = 7.2 Hz, 1H), 7.23 (d, *J* = 8.6 Hz, 2H), 6.96 (d, *J* = 8.6 Hz, 2H), 6.28 (s, 2H), 5.06 (s, 2H), 4.87 (d, *J* = 6.9 Hz, 1H), 3.85 – 3.75 (m, 1H), 3.67 – 3.55 (m, 1H), 3.16 – 3.07 (m, 1H), 1.47 (s, 9H); <sup>13</sup>C NMR (151 MHz, CDCl<sub>3</sub>) δ 176.33, 170.87, 157.83, 141.16, 136.98, 134.91, 133.30, 132.11, 129.98, 129.30, 128.62, 128.51, 128.34, 128.00, 127.48, 115.25, 83.57, 82.28, 70.09, 48.55, 45.79, 28.07; HRMS(ESI): calcd. for C<sub>28</sub>H<sub>31</sub>N<sub>2</sub>O<sub>5</sub>S (M+H)<sup>+</sup>: 507.1948, found: 507.1948.

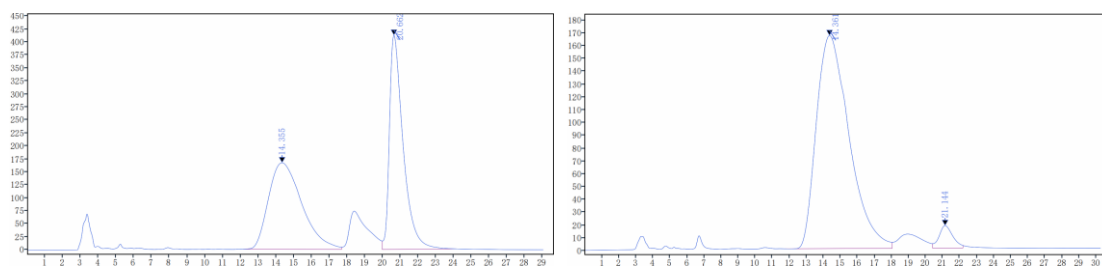

| Peak   | RetTime [min] | Type   | Width[min] | Area[mAU*s] | Height[mAU] | Area% |
|--------|---------------|--------|------------|-------------|-------------|-------|
| 14.355 | BV            | 5.5723 | 21660.3668 | 166.4057    | 49.4885     |       |
| 20.662 | VM m          | 0.7982 | 22108.0813 | 411.9087    | 50.5115     |       |

  

| Peak   | RetTime [min] | Type   | Width[min] | Area[mAU*s] | Height[mAU] | Area% |
|--------|---------------|--------|------------|-------------|-------------|-------|
| 14.361 | MM m          | 1.9898 | 22292.6358 | 166.4224    | 95.7930     |       |
| 21.144 | MM m          | 0.8415 | 979.0471   | 17.5588     | 4.2070      |       |

**tert-butyl (2S,3R)-3-(4-(dimethylamino)phenyl)-5-(2-sulfamoylphenyl)-3,4-dihydro-2H-pyrrole-2-carboxylate (4u):**

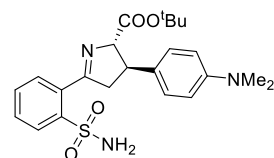

Colorless oil (87.9 mg, >99%);  $R_f$  = 0.21 (petroleum ether/ethyl acetate = 3:2); the enantiomeric excess was determined to be 84% by HPLC analysis on Daicel Chirapak IE column (hexane/isopropanol = 70/30, flow rate 1.0 mL/min, T = 30 °C), UV 254 nm,  $t_R$ (major) 29.103 min,

$t_R$ (minor) 48.832 min;  $[\alpha]_D^{25}$  = +30.10 (c = 0.63, CH<sub>2</sub>Cl<sub>2</sub>); <sup>1</sup>H NMR (600 MHz, CDCl<sub>3</sub>) δ 8.16 (d, *J* = 7.5 Hz, 1H), 7.60 (t, *J* = 7.4 Hz, 1H), 7.57 – 7.51 (m, 2H), 7.19 (d, *J* = 8.6 Hz, 2H), 6.73 (d, *J* = 8.5 Hz, 2H), 6.32 (s, 2H), 4.87 (d, *J* = 6.8 Hz, 1H), 3.82 – 3.73 (m, 1H), 3.66 – 3.57 (m, 1H),

3.17 – 3.08 (m, 1H), 2.93 (s, 6H), 1.48 (s, 9H);  $^{13}\text{C}$  NMR (151 MHz,  $\text{CDCl}_3$ )  $\delta$  176.43, 171.05, 149.68, 141.14, 133.41, 132.05, 129.87, 129.34, 128.46, 128.08, 127.89, 113.03, 83.57, 82.10, 48.47, 45.65, 40.70, 28.05; HRMS(ESI): calcd. for  $\text{C}_{23}\text{H}_{30}\text{N}_3\text{O}_4\text{S}$  (M+H) $^+$ : 444.1952, found: 444.1950.

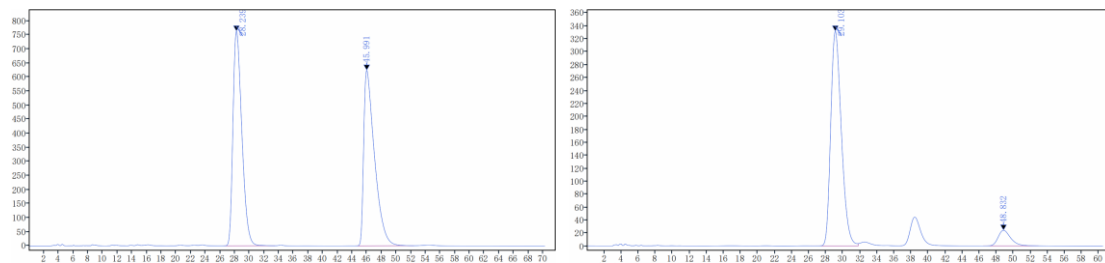

| Peak | RetTime [min] | Type | Width[min] | Area[mAU*s] | Height[mAU] | Area%   | Peak | RetTime [min] | Type | Width[min] | Area[mAU*s] | Height[mAU] | Area%   |
|------|---------------|------|------------|-------------|-------------|---------|------|---------------|------|------------|-------------|-------------|---------|
|      | 28.239        | BB   | 7.0150     | 64091.9308  | 762.5519    | 50.1279 |      | 29.103        | MM m | 1.3492     | 28642.7208  | 331.1128    | 92.1621 |
|      | 45.991        | BB   | 7.9983     | 63764.8213  | 623.8351    | 49.8721 |      | 48.832        | MM m | 1.5107     | 2435.9279   | 23.9489     | 7.8379  |

**tert-butyl (2S,3R)-3-(2,6-dichlorophenyl)-5-(2-sulfamoylphenyl)-3,4-dihydro-2H-pyrrole-2-carboxylate (4v):**

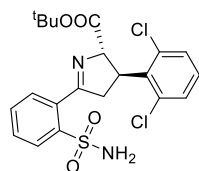

Colorless oil (74.3 mg, 79%);  $R_f$  = 0.18 (petroleum ether/ethyl acetate = 3:1); the enantiomeric excess was determined to be 83% by HPLC analysis on Daicel Chirapak IB column (hexane/isopropanol = 80/20, flow rate 1.0 mL/min, T = 30 °C), UV 254 nm,  $t_R$ (major) 9.527 min,  $t_R$ (minor) 8.524 min;  $[\alpha]_D^{25}$  = -50.37 (c = 0.68,  $\text{CH}_2\text{Cl}_2$ );  $^1\text{H}$  NMR (600 MHz,  $\text{CDCl}_3$ )  $\delta$  8.16 (d,  $J$  = 7.8 Hz, 1H), 7.61 (t,  $J$  = 7.5 Hz, 1H), 7.57 – 7.48 (m, 2H), 7.37 (d,  $J$  = 8.0 Hz, 2H), 7.17 (t,  $J$  = 8.0 Hz, 1H), 6.30 (s, 2H), 5.34 (d,  $J$  = 7.8 Hz, 1H), 4.80 – 4.67 (m, 1H), 3.59 – 3.45 (m, 1H), 1.48 (s, 9H);  $^{13}\text{C}$  NMR (151 MHz,  $\text{CDCl}_3$ )  $\delta$  175.83, 171.10, 141.19, 136.48, 133.57, 132.05, 129.81, 129.43, 128.81, 128.66, 128.54, 82.66, 80.02, 45.46, 40.99, 27.93; HRMS(ESI): calcd. for  $\text{C}_{21}\text{H}_{23}\text{N}_2\text{O}_5\text{S}$  (M+H) $^+$ : 469.0750, found: 469.0748.

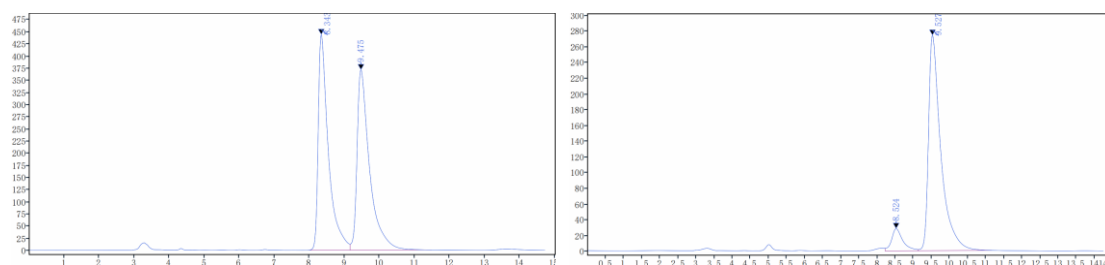

| Peak | RetTime [min] | Type | Width[min] | Area[mAU*s] | Height[mAU] | Area%   | Peak | RetTime [min] | Type | Width[min] | Area[mAU*s] | Height[mAU] | Area%   |
|------|---------------|------|------------|-------------|-------------|---------|------|---------------|------|------------|-------------|-------------|---------|
|      | 8.343         | BV   | 1.3650     | 8949.2135   | 443.3240    | 49.2861 |      | 8.524         | MM m | 0.3141     | 607.1931    | 28.2100     | 8.5976  |
|      | 9.475         | VB   | 2.3334     | 9208.4633   | 370.8091    | 50.7139 |      | 9.527         | MM m | 0.3433     | 6455.1811   | 273.5633    | 91.4024 |

**tert-butyl (2S,3R)-3-(4-phenoxyphenyl)-5-(2-sulfamoylphenyl)-3,4-dihydro-2H-pyrrole-2-carboxylate (4w):**



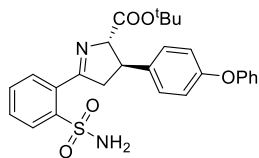

White solid (84.6 mg, 86%); m.p. = 163-166 °C;  $R_f$  = 0.20 (petroleum ether/ethyl acetate = 2:1); the enantiomeric excess was determined to be 90% by HPLC analysis on Daicel Chirapak IE column (hexane/isopropanol = 70/30, flow rate 1.0 mL/min, T = 30 °C), UV 254 nm,  $t_R$ (major) 19.335 min,  $t_R$ (minor) 25.639 min;  $[\alpha]_D^{25}$  = +30.31 (c = 0.65, CH<sub>2</sub>Cl<sub>2</sub>); <sup>1</sup>H NMR (600 MHz, CDCl<sub>3</sub>) δ 8.17 (d,  $J$  = 7.8 Hz, 1H), 7.62 (t,  $J$  = 7.4 Hz, 1H), 7.64 – 7.59 (m, 2H), 7.33 (t,  $J$  = 7.8 Hz, 2H), 7.28 (d,  $J$  = 8.5 Hz, 2H), 7.10 (t,  $J$  = 7.3 Hz, 1H), 7.04 – 6.96 (m, 4H), 6.27 (s, 2H), 4.90 (d,  $J$  = 6.9 Hz, 1H), 3.89 – 3.80 (m, 1H), 3.70 – 3.61 (m, 1H), 3.20 – 3.09 (m, 1H), 1.49 (s, 9H); <sup>13</sup>C NMR (151 MHz, CDCl<sub>3</sub>) δ 176.29, 170.76, 157.16, 156.29, 141.18, 137.35, 133.23, 132.12, 130.03, 129.78, 129.26, 128.60, 128.53, 123.35, 119.22, 118.89, 83.53, 82.39, 48.54, 45.88, 28.07; HRMS(ESI): calcd. for C<sub>27</sub>H<sub>29</sub>N<sub>2</sub>O<sub>5</sub>S (M+H)<sup>+</sup>: 493.1792, found: 493.1791.

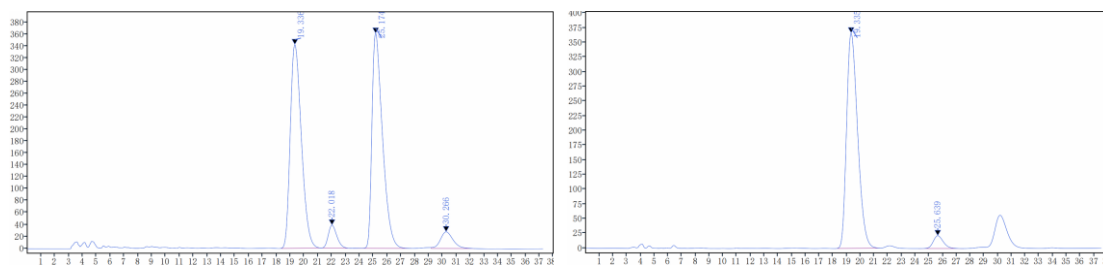

| Peak   | RetTime [min] | Type   | Width[min] | Area[mAU*s] | Height[mAU] | Area% |
|--------|---------------|--------|------------|-------------|-------------|-------|
| 19.336 | BB            | 3.0371 | 19132.7695 | 342.3703    | 45.9105     |       |
| 22.018 | BB            | 2.1867 | 1653.5076  | 38.5376     | 3.9677      |       |
| 25.174 | BB            | 4.2367 | 19104.6994 | 361.4690    | 45.8431     |       |
| 30.266 | MMm           | 0.9786 | 1783.1248  | 28.0134     | 4.2787      |       |

  

| Peak   | RetTime [min] | Type   | Width[min] | Area[mAU*s] | Height[mAU] | Area% |
|--------|---------------|--------|------------|-------------|-------------|-------|
| 19.335 | BB            | 3.3203 | 20508.9468 | 366.7205    | 94.8356     |       |
| 25.639 | BB            | 3.2950 | 1116.8507  | 21.8280     | 5.1644      |       |

### tert-butyl

**(2S,3R)-3-(4-(pyridin-4-yl)phenyl)-5-(2-sulfamoylphenyl)-3,4-dihydro-2H-pyrrole-2-carboxylate (4x):**

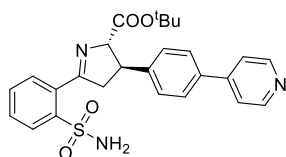

Colorless oil (94.8 mg, >99%);  $R_f$  = 0.21 (petroleum ether/ethyl acetate = 1:2); the enantiomeric excess was determined to be 88% by HPLC analysis on Daicel Chirapak IE column (hexane/isopropanol = 70/30, flow rate 1.0 mL/min, T = 30 °C), UV 254 nm,  $t_R$ (major) 94.068 min,  $t_R$ (minor) 136.391 min;  $[\alpha]_D^{25}$  = +7.33 (c = 0.84, CH<sub>2</sub>Cl<sub>2</sub>); <sup>1</sup>H NMR (600 MHz, CDCl<sub>3</sub>) δ 8.65 (d,  $J$  = 5.9 Hz, 2H), 8.18 (d,  $J$  = 7.8 Hz, 1H), 7.67–7.61 (m, 3H), 7.59 – 7.55 (m, 2H), 7.52 – 7.49 (m, 2H), 7.46 (d,  $J$  = 8.3 Hz, 2H), 6.38 (s, 2H), 4.97 (d,  $J$  = 6.8 Hz, 1H), 3.97 – 3.87 (m, 1H), 3.76 – 3.66 (m, 1H), 3.25 – 3.15 (m, 1H), 1.50 (s, 9H); <sup>13</sup>C NMR (151 MHz, CDCl<sub>3</sub>) δ 176.18, 170.58, 150.27, 147.80, 143.82, 141.24, 136.89, 133.09, 132.13, 130.10, 129.25, 128.54, 128.15, 127.53, 121.48, 121.42, 83.49, 82.54, 48.50, 46.12, 28.06; HRMS(ESI): calcd. for C<sub>26</sub>H<sub>28</sub>N<sub>3</sub>O<sub>4</sub>S (M+H)<sup>+</sup>: 478.1795, found: 478.1794.



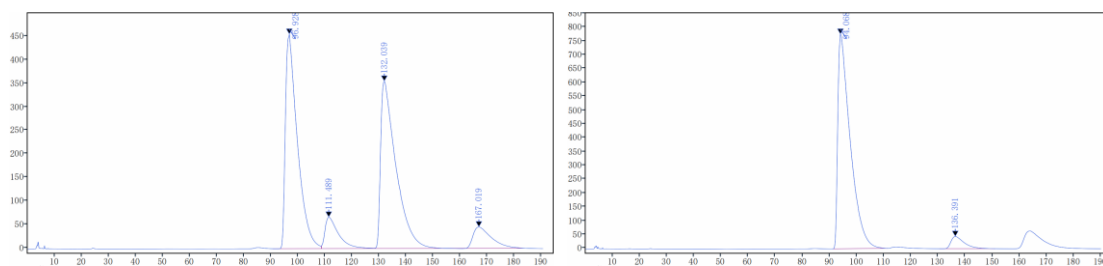

| Peak    | RetTime [min] | Type   | Width[min]  | Area[mAU*s] | Height[mAU] | Area% |
|---------|---------------|--------|-------------|-------------|-------------|-------|
| 96.928  | MM m          | 3.6625 | 139887.3375 | 455.8074    | 43.2240     |       |
| 111.489 | MM m          | 4.2517 | 23053.0984  | 66.7253     | 7.1232      |       |
| 132.039 | MM m          | 5.0923 | 139517.7805 | 355.6061    | 43.1099     |       |
| 167.019 | MM m          | 5.5025 | 21174.9111  | 45.3745     | 6.5429      |       |

  

| Peak    | RetTime [min] | Type    | Width[min]  | Area[mAU*s] | Height[mAU] | Area% |
|---------|---------------|---------|-------------|-------------|-------------|-------|
| 94.068  | BB            | 20.5650 | 246574.9150 | 776.6578    | 94.2744     |       |
| 136.391 | MM m          | 4.0119  | 14975.3730  | 44.1987     | 5.7256      |       |

**tert-butyl (2S,3R)-3-(naphthalen-1-yl)-5-(2-sulfamoylphenyl)-3,4-dihydro-2H-pyrrole-2-carboxylate (4y):**

White solid (86.8 mg, 96%); m.p. = 144-147 °C;  $R_f$  = 0.22 (petroleum ether/ethyl acetate = 2:1); the enantiomeric excess was determined to be 91% by HPLC analysis on Daicel Chirapak IB column (hexane/isopropanol = 90/10, flow rate 1.0 mL/min, T = 30 °C), UV 254 nm,  $t_R$ (major) 19.372 min,  $t_R$ (minor) 25.698 min;  $[\alpha]_D^{25} = +23.61$  (c = 0.69, CH<sub>2</sub>Cl<sub>2</sub>); <sup>1</sup>H NMR (600 MHz, CDCl<sub>3</sub>) δ 8.18 (d, J = 7.6 Hz, 1H), 8.11 (d, J = 8.4 Hz, 1H), 7.89 (d, J = 8.1 Hz, 1H), 7.78 (d, J = 6.8 Hz, 1H), 7.63 – 7.58 (m, 1H), 7.58 – 7.54 (m, 3H), 7.51 (t, J = 7.4 Hz, 1H), 7.49 – 7.44 (m, 2H), 6.37 (s, 2H), 5.24 (d, J = 5.8 Hz, 1H), 4.72 – 4.61 (m, 1H), 3.88 – 3.77 (m, 1H), 3.34 – 3.24 (m, 1H), 1.44 (s, 9H); <sup>13</sup>C NMR (151 MHz, CDCl<sub>3</sub>) δ 176.51, 170.74, 141.22, 138.61, 134.10, 133.14, 132.12, 131.19, 130.06, 129.41, 129.19, 128.57, 127.75, 126.35, 125.78, 125.70, 124.43, 123.12, 82.86, 82.50, 48.46, 41.80, 27.97; HRMS(ESI): calcd. for C<sub>25</sub>H<sub>27</sub>N<sub>2</sub>O<sub>4</sub>S (M+H)<sup>+</sup>: 451.1686, found: 451.1685.

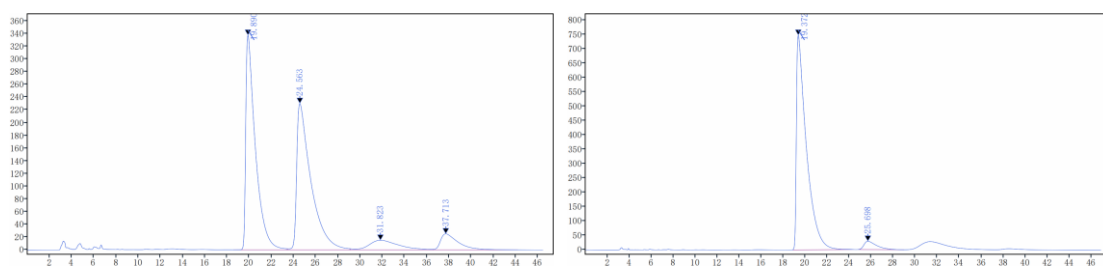

| Peak   | RetTime [min] | Type   | Width[min] | Area[mAU*s] | Height[mAU] | Area% |
|--------|---------------|--------|------------|-------------|-------------|-------|
| 19.890 | MM m          | 0.8588 | 20285.2919 | 337.2291    | 43.9491     |       |
| 24.563 | MM m          | 1.2405 | 20357.9619 | 230.0243    | 44.1065     |       |
| 31.823 | MM m          | 2.2469 | 2740.6738  | 15.0049     | 5.9378      |       |
| 37.713 | MM m          | 1.5530 | 2772.4439  | 25.1125     | 6.0066      |       |

  

| Peak   | RetTime [min] | Type   | Width[min] | Area[mAU*s] | Height[mAU] | Area% |
|--------|---------------|--------|------------|-------------|-------------|-------|
| 19.372 | BB            | 5.9717 | 47034.5924 | 747.1080    | 95.2606     |       |
| 25.698 | BB            | 4.3500 | 2340.0403  | 29.0718     | 4.7394      |       |

**tert-butyl (2S,3R)-3-(naphthalen-2-yl)-5-(2-sulfamoylphenyl)-3,4-dihydro-2H-pyrrole-2-carboxylate (4z):**

White solid (76.6 mg, 85%); m.p. = 133-136 °C;  $R_f$  = 0.20 (petroleum ether/ethyl acetate = 2:1); the enantiomeric excess was determined to be

92% by HPLC analysis on Daicel Chirapak IE column (hexane/isopropanol = 70/30, flow rate 1.0 mL/min, T = 30 °C), UV 254 nm,  $t_R$ (major) 22.423 min,  $t_R$ (minor) 30.302 min;  $[\alpha]_D^{25} = +19.63$  (c = 0.66, CH<sub>2</sub>Cl<sub>2</sub>); <sup>1</sup>H NMR (600 MHz, CDCl<sub>3</sub>) δ 8.18 (d, *J* = 7.9 Hz, 1H), 7.85 (d, *J* = 8.5 Hz, 1H), 7.82 (d, *J* = 6.8 Hz, 2H), 7.77 (s, 1H), 7.62 (t, *J* = 7.5 Hz, 1H), 7.59 – 7.54 (m, 2H), 7.50 – 7.42 (m, 3H), 6.31 (s, 2H), 5.04 (d, *J* = 6.8 Hz, 1H), 4.08 – 3.99 (m, 1H), 3.78 – 3.67 (m, 1H), 3.31 – 3.21 (m, 1H) 1.47 (s, 9H); <sup>13</sup>C NMR (151 MHz, CDCl<sub>3</sub>) δ 176.28, 170.76, 141.22, 139.85, 133.49, 133.21, 132.51, 132.11, 130.03, 129.32, 128.89, 128.54, 127.70, 127.67, 126.36, 126.12, 125.84, 125.15, 83.45, 82.38, 48.53, 46.56, 28.04; HRMS(ESI): calcd. for C<sub>25</sub>H<sub>27</sub>N<sub>2</sub>O<sub>4</sub>S (M+H)<sup>+</sup>: 451.1686, found: 451.1685.

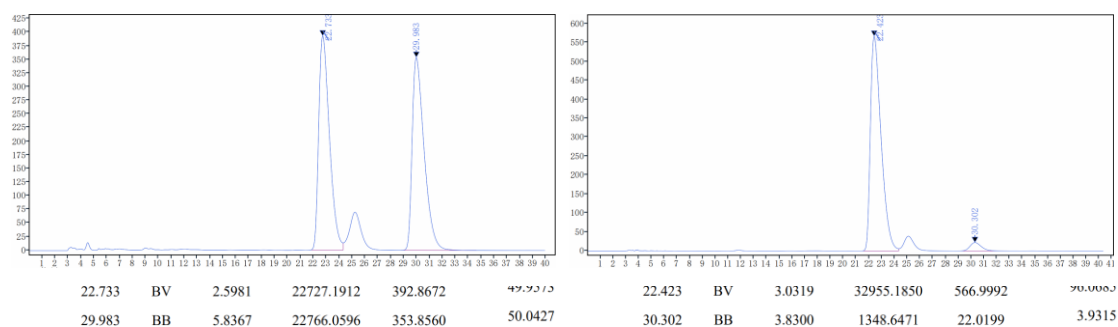

**tert-butyl (2S,3R)-3-(benzo[d][1,3]dioxol-5-yl)-5-(2-sulfamoylphenyl)-3,4-dihydro-2H-pyrrole-2-carboxylate (4aa):**

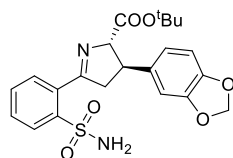

White solid (28.1 mg, 32%); m.p. = 133-135 °C;  $R_f$  = 0.31 (petroleum ether/ethyl acetate = 3:2); the enantiomeric excess was determined to be 93% by HPLC analysis on Daicel Chirapak ID column (hexane/isopropanol = 70/30, flow rate 1.0 mL/min, T = 30 °C), UV 254 nm,  $t_R$ (major) 20.173 min,  $t_R$ (minor) 37.501 min;  $[\alpha]_D^{25} = +28.49$  (c = 0.22, CH<sub>2</sub>Cl<sub>2</sub>); <sup>1</sup>H NMR (600 MHz, CDCl<sub>3</sub>) δ 8.16 (d, *J* = 7.8 Hz, 1H), 7.62 (t, *J* = 7.4 Hz, 1H), 7.58 – 7.50 (m, 2H), 6.82 (s, 1H), 6.79 – 6.74 (m, 2H), 6.27 (s, 2H), 5.95 (s, 2H), 4.86 (d, *J* = 6.8 Hz, 1H), 3.83 – 3.73 (m, 1H), 3.67 – 3.59 (m, 1H), 3.15 – 3.06 (m, 1H), 1.48 (s, 9H); <sup>13</sup>C NMR (151 MHz, CDCl<sub>3</sub>) δ 176.28, 170.76, 148.10, 146.58, 141.15, 136.43, 133.22, 132.11, 130.01, 129.25, 128.51, 120.51, 108.45, 107.45, 101.10, 83.54, 82.39, 48.58, 46.27, 28.06; HRMS(ESI): calcd. for C<sub>22</sub>H<sub>25</sub>N<sub>2</sub>O<sub>6</sub>S (M+H)<sup>+</sup>: 445.1428, found: 445.1426.

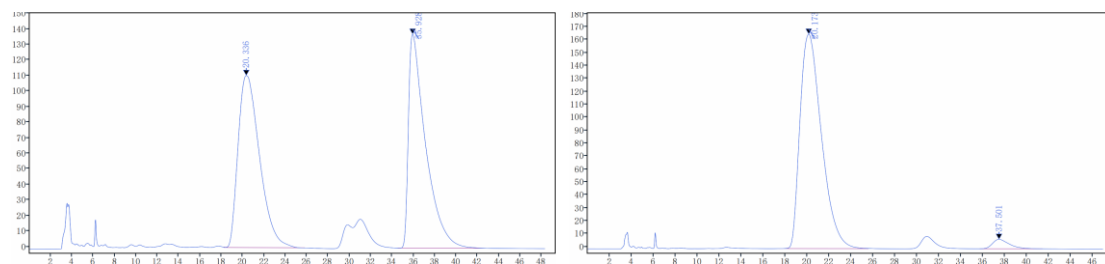

| Peak   | RetTime [min] | Type   | Width [min] | Area [mAU*s] | Height [mAU] | Area%  | Peak | RetTime [min] | Type       | Width [min] | Area [mAU*s] | Height [mAU] | Area% |
|--------|---------------|--------|-------------|--------------|--------------|--------|------|---------------|------------|-------------|--------------|--------------|-------|
| 20.336 | MM m          | 2.1529 | 15463.4167  | 110.6186     | 50.2212      | 20.173 | MM m | 2.1036        | 22557.0371 | 165.5514    | 96.7033      |              |       |
| 35.928 | MM m          | 1.5900 | 15327.1960  | 137.4412     | 49.7788      | 37.501 | MM m | 1.4494        | 768.9830   | 7.2444      | 3.2967       |              |       |

**tert-butyl (2S,3R)-3-(2,3-dihydrobenzofuran-5-yl)-5-(2-sulfamoylphenyl)-3,4-dihydro-2H-pyrrole-2-carboxylate (4ab):**

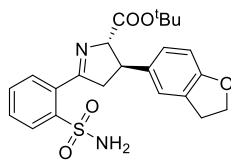

White solid (59.3 mg, 67%); m.p. = 144-147 °C;  $R_f$  = 0.12 (petroleum ether/ethyl acetate = 2:1); the enantiomeric excess was determined to be 92% by HPLC analysis on Daicel Chirapak IF column (hexane/isopropanol = 70/30, flow rate 1.0 mL/min, T = 30 °C), UV 254 nm,  $t_R$ (major) 11.697 min,  $t_R$ (minor) 19.290 min;  $[\alpha]_D^{25}$  = +25.25 (c = 0.49, CH<sub>2</sub>Cl<sub>2</sub>); <sup>1</sup>H NMR (600 MHz, CDCl<sub>3</sub>) δ 8.16 (d, J = 7.3 Hz, 1H), 7.64 – 7.59 (m, 1H), 7.58 – 7.52 (m, 2H), 7.17 (s, 1H), 7.03 (d, J = 8.1 Hz, 1H), 6.74 (d, J = 8.2 Hz, 1H), 6.30 (s, 2H), 4.87 (d, J = 6.8 Hz, 1H), 4.57 (t, J = 8.7 Hz, 2H), 3.83 – 3.73 (m, 1H), 3.67 – 3.59 (m, 1H), 3.20 (t, J = 8.6 Hz, 2H), 3.15 – 3.07 (m, 1H), 1.48 (s, 9H); <sup>13</sup>C NMR (151 MHz, CDCl<sub>3</sub>) δ 176.34, 170.89, 159.15, 141.13, 134.62, 133.25, 132.10, 129.98, 129.32, 128.50, 127.80, 127.05, 123.66, 109.30, 83.75, 82.25, 71.35, 48.72, 46.00, 29.77, 28.0; HRMS(ESI): calcd. for C<sub>23</sub>H<sub>27</sub>N<sub>2</sub>O<sub>5</sub>S (M+H)<sup>+</sup>: 443.1635, found: 443.1633.

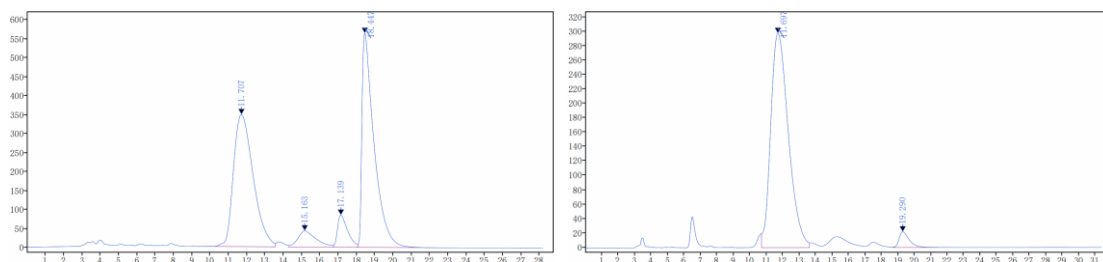

| Peak   | RetTime [min] | Type   | Width [min] | Area [mAU*s] | Height [mAU] | Area%  | Peak | RetTime [min] | Type       | Width [min] | Area [mAU*s] | Height [mAU] | Area% |
|--------|---------------|--------|-------------|--------------|--------------|--------|------|---------------|------------|-------------|--------------|--------------|-------|
| 11.707 | MM m          | 1.1623 | 26010.2437  | 348.2638     | 44.7959      | 11.697 | MM m | 1.1659        | 22168.8633 | 297.6684    | 95.9636      |              |       |
| 15.163 | MM m          | 0.9843 | 2916.4837   | 42.7283      | 5.0229       | 19.290 | MM m | 0.6369        | 932.4509   | 21.8503     | 4.0364       |              |       |
| 17.139 | MM m          | 0.5722 | 3219.6572   | 84.5560      | 5.5450       |        |      |               |            |             |              |              |       |
| 18.447 | MM m          | 0.6599 | 25917.5154  | 564.1864     | 44.6362      |        |      |               |            |             |              |              |       |

**tert-butyl (2S,3R)-3-(benzo[b]thiophen-3-yl)-5-(2-sulfamoylphenyl)-3,4-dihydro-2H-pyrrole-2-carboxylate (4ac):**

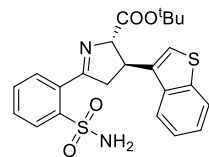

White solid (80.3 mg, 88%); m.p. = 151-154 °C;  $R_f$  = 0.22 (petroleum ether/ethyl acetate = 2:1); the enantiomeric excess was determined to be 80% by HPLC analysis on Daicel Chirapak IB column (hexane/isopropanol = 70/30, flow rate 1.0 mL/min, T = 30 °C), UV 254 nm,  $t_R$ (major) 21.593 min,  $t_R$ (minor) 29.930 min;  $[\alpha]_D^{25}$  = +33.72 (c = 0.60, CH<sub>2</sub>Cl<sub>2</sub>); <sup>1</sup>H NMR (600 MHz, CDCl<sub>3</sub>) δ 8.18 (d, J = 7.8 Hz, 1H), 7.89 (d, J = 7.9 Hz, 1H), 7.81 (d, J = 7.7 Hz, 1H), 7.61 (t, J = 7.4 Hz, 1H), 7.59 – 7.52 (m, 2H), 7.43 – 7.43 (m, 2H), 7.33 (s, 1H), 6.30 (s, 2H), 5.18 (d, J = 6.0 Hz, 1H), 4.34 – 4.25 (m, 1H), 3.82 – 3.68 (m, 1H), 3.33 – 3.22 (m, 1H), 1.48 (s, 9H); <sup>13</sup>C NMR (151 MHz, CDCl<sub>3</sub>) δ

176.54, 170.55, 141.19, 140.94, 137.67, 136.68, 133.10, 132.14, 130.11, 129.35, 128.57, 124.56, 124.22, 123.24, 122.23, 121.69, 82.62, 81.43, 46.81, 39.94, 28.03; **HRMS(ESI)**: calcd. for  $C_{23}H_{25}N_2O_4S_2$  (M+H)<sup>+</sup>: 457.1250, found: 457.1249.

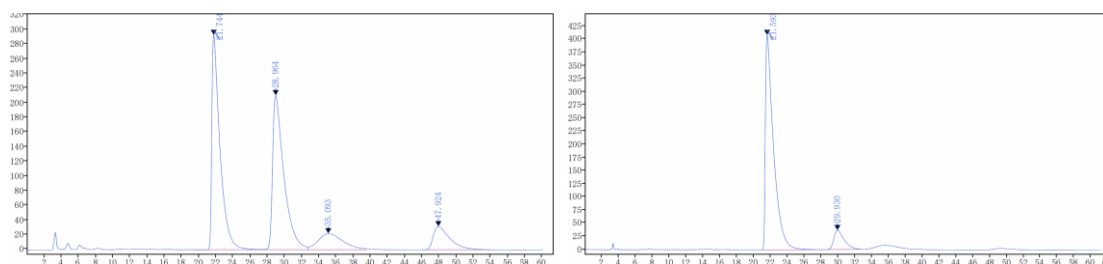

| Peak   | RetTime [min] | Type   | Width[min] | Area[mAU*s] | Height[mAU] | Area% |
|--------|---------------|--------|------------|-------------|-------------|-------|
| 21.744 | MM m          | 0.9203 | 19290.1422 | 292.5597    | 40.9337     |       |
| 28.964 | MM m          | 1.3316 | 19208.1075 | 210.3064    | 40.7596     |       |
| 35.093 | MM m          | 2.4174 | 4420.7667  | 21.8782     | 9.3809      |       |
| 47.924 | MM m          | 1.9014 | 4206.3018  | 31.5091     | 8.9258      |       |

  

| Peak   | RetTime [min] | Type   | Width[min] | Area[mAU*s] | Height[mAU] | Area% |
|--------|---------------|--------|------------|-------------|-------------|-------|
| 21.593 | BB            | 7.6200 | 27453.2438 | 408.1479    | 89.8132     |       |
| 29.930 | BB            | 4.6583 | 3113.8022  | 36.2948     | 10.1868     |       |

**tert-butyl (2S,3R)-5-(2-sulfamoylphenyl)-3-(thiophen-3-yl)-3,4-dihydro-2H-pyrrole-2-carboxylate (4ad):**

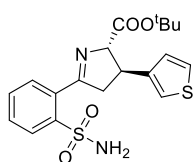

White solid (62.4 mg, 77%); m.p. = 126-128 °C;  $R_f$  = 0.23 (petroleum ether/ethyl acetate = 2:1); the enantiomeric excess was determined to be 92% by HPLC analysis on Daicel Chirapak IE column (hexane/isopropanol = 70/30, flow rate 1.0 mL/min, T = 30 °C), UV 254 nm,  $t_R$ (major) 16.107 min,  $t_R$ (minor) 21.028 min;  $[\alpha]_D^{25}$  = +42.5 (c = 0.52,  $CH_2Cl_2$ );  **$^1H$  NMR (600 MHz,  $CDCl_3$ )**  $\delta$  8.15 (d,  $J$  = 7.8 Hz, 1H), 7.61 (t,  $J$  = 7.4 Hz, 1H), 7.57 – 7.49 (m, 2H), 7.37 – 7.29 (m, 1H), 7.18 – 7.13 (m, 1H), 7.08 (d,  $J$  = 4.9 Hz, 1H), 6.29 (s, 2H), 4.88 (d,  $J$  = 6.9 Hz, 1H), 4.03 – 3.92 (m, 1H), 3.68 – 3.55 (m, 1H), 3.20 – 3.07 (m, 1H), 1.50 (s, 9H);  **$^{13}C$  NMR (151 MHz,  $CDCl_3$ )**  $\delta$  176.39, 170.74, 142.76, 141.13, 133.22, 132.11, 130.01, 129.26, 128.51, 126.62, 126.56, 120.91, 82.45, 47.56, 41.72, 28.06; **HRMS(ESI)**: calcd. for  $C_{19}H_{23}N_2O_4S_2$  (M+H)<sup>+</sup>: 407.1094, found: 407.1092.

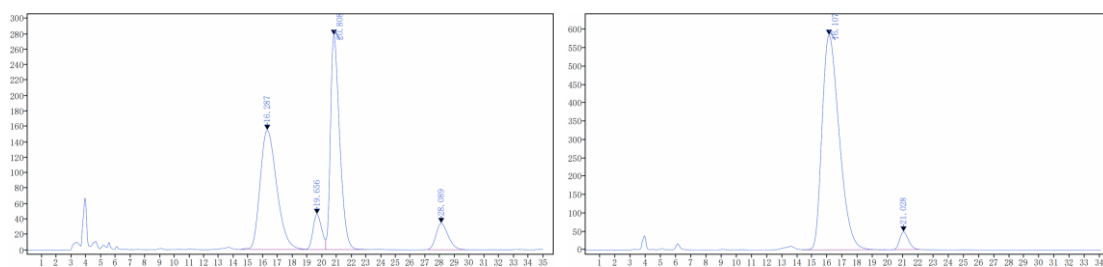

| Peak   | RetTime [min] | Type   | Width[min] | Area[mAU*s] | Height[mAU] | Area% |
|--------|---------------|--------|------------|-------------|-------------|-------|
| 16.287 | MM m          | 1.2177 | 12110.0470 | 154.6327    | 43.2782     |       |
| 19.656 | MM m          | 0.6439 | 1892.7204  | 45.7257     | 6.7641      |       |
| 20.808 | MM m          | 0.6604 | 12015.0668 | 277.9106    | 42.9388     |       |
| 28.089 | MM m          | 0.8785 | 1964.0291  | 34.1232     | 7.0189      |       |

  

| Peak   | RetTime [min] | Type   | Width[min] | Area[mAU*s] | Height[mAU] | Area% |
|--------|---------------|--------|------------|-------------|-------------|-------|
| 16.107 | MM m          | 1.2234 | 46030.3843 | 584.1089    | 95.9088     |       |
| 21.028 | MM m          | 0.6326 | 1963.5370  | 48.2666     | 4.0912      |       |

**tert-butyl (2S,3S)-5-(2-sulfamoylphenyl)-3-(thiophen-2-yl)-3,4-dihydro-2H-pyrrole-2-carboxylate (4ae):**

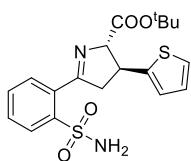

Pale yellow solid (65.9 mg, 80%); m.p. = 99-101 °C;  $R_f$  = 0.29 (petroleum ether/ethyl acetate = 2:1); the enantiomeric excess was determined to be 93% by HPLC analysis on Daicel Chirapak IB column (hexane/isopropanol = 80/20, flow rate 0.5 mL/min, T = 30 °C), UV 254 nm,  $t_R$ (major) 18.824 min,  $t_R$ (minor) 23.607 min;  $[\alpha]_D^{25}$  = +22.94 (c = 0.62, CH<sub>2</sub>Cl<sub>2</sub>); **<sup>1</sup>H NMR (600 MHz, CDCl<sub>3</sub>)** δ 8.14 (d,  $J$  = 7.8 Hz, 1H), 7.61 (t,  $J$  = 7.4 Hz, 1H), 7.58 – 7.48 (m, 2H), 7.20 (d,  $J$  = 4.9 Hz, 1H), 7.01 – 6.94 (m, 2H), 6.25 (s, 2H), 4.91 (d,  $J$  = 7.2 Hz, 1H), 4.24 – 4.12 (m, 1H), 3.72 – 3.55 (m, 1H), 3.30 – 3.15 (m, 1H), 1.51 (s, 9H); **<sup>13</sup>C NMR (151 MHz, CDCl<sub>3</sub>)** δ 176.02, 170.30, 145.15, 141.16, 133.12, 132.11, 130.03, 129.18, 128.53, 127.19, 124.57, 123.91, 83.17, 82.75, 48.59, 41.74, 28.05; **HRMS(ESI)**: calcd. for C<sub>19</sub>H<sub>23</sub>N<sub>2</sub>O<sub>4</sub>S<sub>2</sub> (M+H)<sup>+</sup>: 407.1094, found: 407.1092.

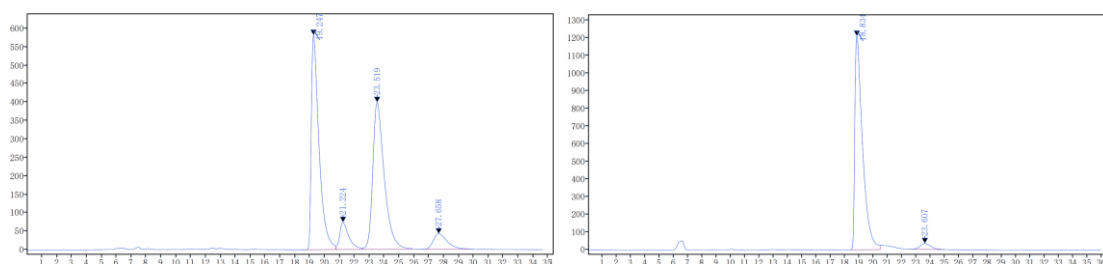

| Peak | RetTime [min] | Type | Width [min] | Area [mAU*s] | Height [mAU] | Area%   |
|------|---------------|------|-------------|--------------|--------------|---------|
|      | 19.247        | BV   | 2.3828      | 21000.3824   | 581.6891     | 43.6797 |
|      | 21.224        | VV   | 1.7667      | 3125.9161    | 73.7046      | 6.5017  |
|      | 23.519        | VM m | 0.7922      | 21257.4153   | 398.5769     | 44.2143 |
|      | 27.658        | BM m | 0.9914      | 2694.3941    | 41.2852      | 5.6042  |

  

| Peak | RetTime [min] | Type | Width [min] | Area [mAU*s] | Height [mAU] | Area%   |
|------|---------------|------|-------------|--------------|--------------|---------|
|      | 18.834        | BM m | 0.5530      | 45543.4099   | 1207.6368    | 96.3157 |
|      | 23.607        | BB   | 3.0033      | 1742.1355    | 33.1684      | 3.6843  |

**tert-butyl (2S,3S)-3-(furan-2-yl)-5-(2-sulfamoylphenyl)-3,4-dihydro-2H-pyrrole-2-carboxylate (4af):**

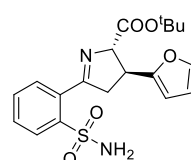

White solid (59.5 mg, 76%); m.p. = 135-138 °C;  $R_f$  = 0.24 (petroleum ether/ethyl acetate = 2:1); the enantiomeric excess was determined to be 93% by HPLC analysis on Daicel Chirapak IB column (hexane/isopropanol = 80/20, flow rate 0.5 mL/min, T = 30 °C), UV 254 nm,  $t_R$ (major) 16.467 min,  $t_R$ (minor) 20.061 min;  $[\alpha]_D^{25}$  = +39.62 (c = 0.55, CH<sub>2</sub>Cl<sub>2</sub>); **<sup>1</sup>H NMR (600 MHz, CDCl<sub>3</sub>)** δ 8.15 (d,  $J$  = 7.9 Hz, 1H), 7.63 – 7.58 (m, 1H), 7.57 – 7.50 (m, 2H), 7.38 (d,  $J$  = 1.1 Hz, 1H), 6.36 – 6.32 (m, 1H), 6.23 (s, 2H), 6.21 (d,  $J$  = 3.2 Hz, 1H), 5.00 – 4.91 (m, 1H), 4.03 – 3.93 (m, 1H), 3.53 – 3.43 (m, 1H), 3.35 – 3.24 (m, 1H), 1.51 (s, 9H); **<sup>13</sup>C NMR (151 MHz, CDCl<sub>3</sub>)** δ 176.09, 170.38, 154.07, 141.84, 141.15, 133.21, 132.08, 129.97, 129.16, 128.52, 110.47, 106.17, 82.61, 80.07, 45.07, 39.96, 28.03; **HRMS(ESI)**: calcd. for C<sub>19</sub>H<sub>23</sub>Cl<sub>2</sub>N<sub>2</sub>O<sub>4</sub>S (M+H)<sup>+</sup>: 391.1322, found: 391.1317.

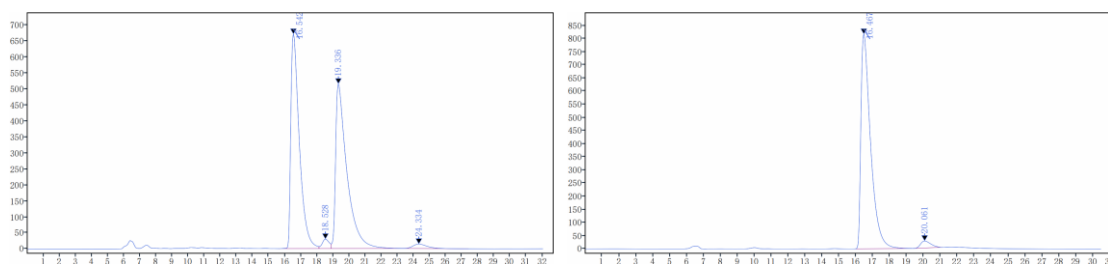

| Peak   | RetTime [min] | Type   | Width [min] | Area [mAU*s] | Height [mAU] | Area% |
|--------|---------------|--------|-------------|--------------|--------------|-------|
| 16.542 | BV            | 2.5297 | 24709.3550  | 671.1692     | 47.9520      |       |
| 18.528 | VV            | 0.7526 | 878.1429    | 29.4799      | 1.7042       |       |
| 19.336 | VB            | 4.4338 | 25078.8316  | 515.3605     | 48.6690      |       |
| 24.334 | BB            | 4.1067 | 863.0523    | 13.8608      | 1.6749       |       |

  

| Peak   | RetTime [min] | Type   | Width [min] | Area [mAU*s] | Height [mAU] | Area% |
|--------|---------------|--------|-------------|--------------|--------------|-------|
| 16.467 | BB            | 3.4372 | 32343.9845  | 816.0845     | 96.6712      |       |
| 20.061 | BB            | 1.7170 | 1113.7439   | 26.5519      | 3.3288       |       |

**tert-butyl (2S,3R)-2-methyl-3-phenyl-5-(2-sulfamoylphenyl)-3,4-dihydro-2H-pyrrole-2-carboxylate (4ag):**

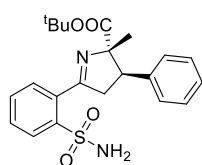

White solid (50.3 mg, 61%); m.p. = 158-161 °C;  $R_f$  = 0.18 (petroleum ether/ethyl acetate = 3:1); the enantiomeric excess was determined to be 68% by HPLC analysis on Daicel Chirapak IE column (hexane/isopropanol = 70/30, flow rate 1.0 mL/min, T = 30 °C), UV 254 nm,  $t_R$ (major) 11.852 min,  $t_R$ (minor) 13.876 min;  $[\alpha]_D^{25}$  = -15.79 (c = 0.33, CH<sub>2</sub>Cl<sub>2</sub>); <sup>1</sup>H NMR (600 MHz, CDCl<sub>3</sub>) δ 8.16 (d, J = 7.8 Hz, 1H), 7.63 (t, J = 7.4 Hz, 1H), 7.60 – 7.50 (m, 2H), 7.37 – 7.24 (m, 5H), 6.29 (s, 2H), 4.10 (t, J = 8.8 Hz, 1H), 3.54 (dd, J = 17.6, 9.1 Hz, 1H), 3.39 (dd, J = 17.6, 8.6 Hz, 1H), 1.53 (s, 9H), 1.16 (s, 3H); <sup>13</sup>C NMR (151 MHz, CDCl<sub>3</sub>) δ 174.72, 173.45, 141.06, 138.55, 133.54, 132.12, 129.89, 129.24, 128.77, 128.44, 128.35, 127.22, 83.18, 82.16, 49.57, 45.23, 28.02, 20.38; HRMS(ESI): calcd. for C<sub>22</sub>H<sub>27</sub>N<sub>2</sub>O<sub>4</sub>S (M+H)<sup>+</sup>: 415.1686, found: 455.1685.

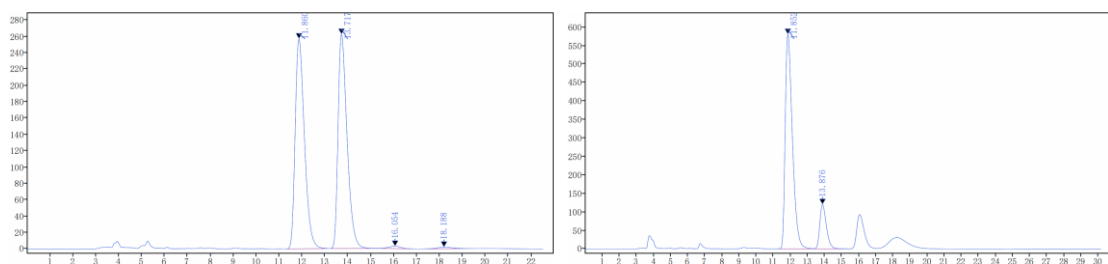

| Peak   | RetTime [min] | Type   | Width [min] | Area [mAU*s] | Height [mAU] | Area% |
|--------|---------------|--------|-------------|--------------|--------------|-------|
| 11.860 | BB            | 1.9287 | 7209.1286   | 256.9269     | 49.4891      |       |
| 13.717 | BB            | 2.1317 | 7151.6826   | 262.1531     | 49.0947      |       |
| 16.054 | BB            | 1.5467 | 109.0736    | 2.9406       | 0.7488       |       |
| 18.188 | BB            | 2.4017 | 97.2191     | 2.0364       | 0.6674       |       |

  

| Peak   | RetTime [min] | Type   | Width [min] | Area [mAU*s] | Height [mAU] | Area% |
|--------|---------------|--------|-------------|--------------|--------------|-------|
| 11.852 | BV            | 2.1150 | 16917.8139  | 580.6177     | 84.0597      |       |
| 13.876 | VB            | 2.0550 | 3208.1386   | 120.0925     | 15.9403      |       |

## 5. Control Experiment

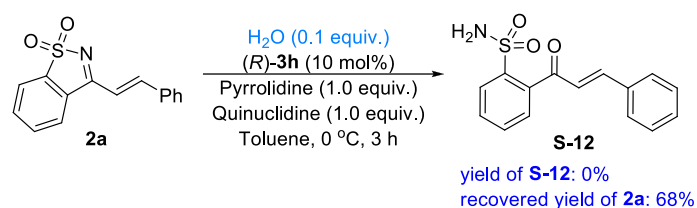

**Stability experiment of 2a.** Add **2a** (52.8 mg, 0.2 mmol),  $\text{H}_2\text{O}$  (3.6  $\mu\text{L}$ , 0.02 mmol),  $(R)\text{-3h}$  (9.4 mg, 0.02 mmol), pyrrolidine (7.1 mg, 0.1 mmol), quinuclidine (22.2 mg, 0.2 mmol), and toluene (2.0 mL) to a dry and clean tube containing a magnetic stir bar. The control experiment was stopped after stirring for 3 h at  $0\text{ }^\circ\text{C}$ , and then the remaining **2a** was isolated by flash chromatography on silica gel with a recovered yield of 69%.

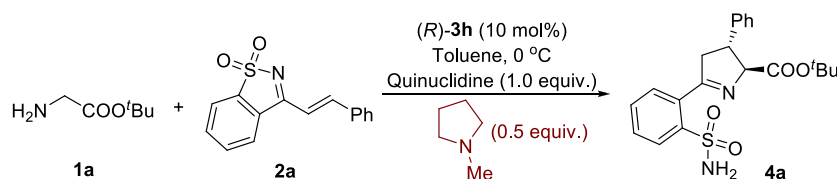

**The experiment of replacing pyrrolidine with *N*-methylpyrrolidine.** Add **1a** (39.3 mg, 0.3 mmol), **2a** (52.8 mg, 0.2 mmol),  $(R)\text{-3h}$  (9.4 mg, 0.02 mmol), quinuclidine (22.2 mg, 0.2 mmol), *N*-methylpyrrolidine (8.5 mg, 0.1 mmol) and toluene (2.0 mL) to a dry and clean tube containing a magnetic stir bar. The reaction mixture was stirred at  $0\text{ }^\circ\text{C}$  for 24 h, after the solvent was removed under vacuum, and the residue was purified by flash chromatography column on silica gel to give **4a** in 35% yield with 95% ee and 95:5 dr.

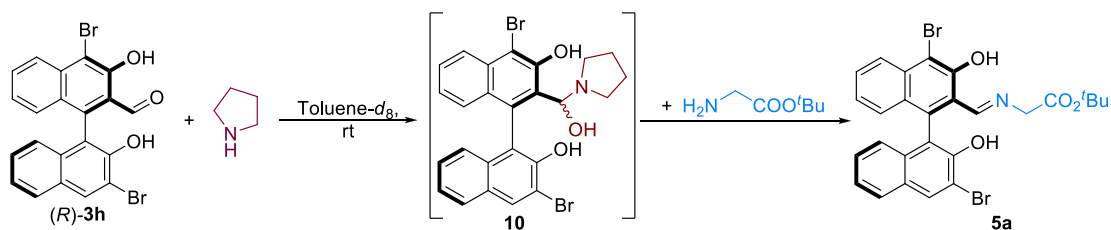

**The reaction of  $(R)\text{-3h}$  and pyrrolidine.** Add  $(R)\text{-3h}$  (9.4 mg, 0.02 mmol), pyrrolidine (2.1 mg, 0.03 mmol),  $\text{CH}_2\text{Br}_2$  (3.5 mg, 0.02 mmol) and  $\text{toluene-}d_8$  (0.5 mL) to a dry and clean NMR tube. After shaking the mixture several times at room temperature, the yield of **10** was immediately determined by  $^1\text{H}$  NMR using  $\text{CH}_2\text{Br}_2$  as an internal standard to be 69%.

**The reaction of **10** and *tert*-butyl glycine ester (**1a**).** Subsequently, add *tert*-butyl glycine ester (7.9 mg, 0.06 mmol) to the aforementioned NMR tube. After shaking the mixture several times at room temperature, the yield of **5a** was immediately determined by  $^1\text{H}$  NMR using  $\text{CH}_2\text{Br}_2$  as an internal standard to be 89%.

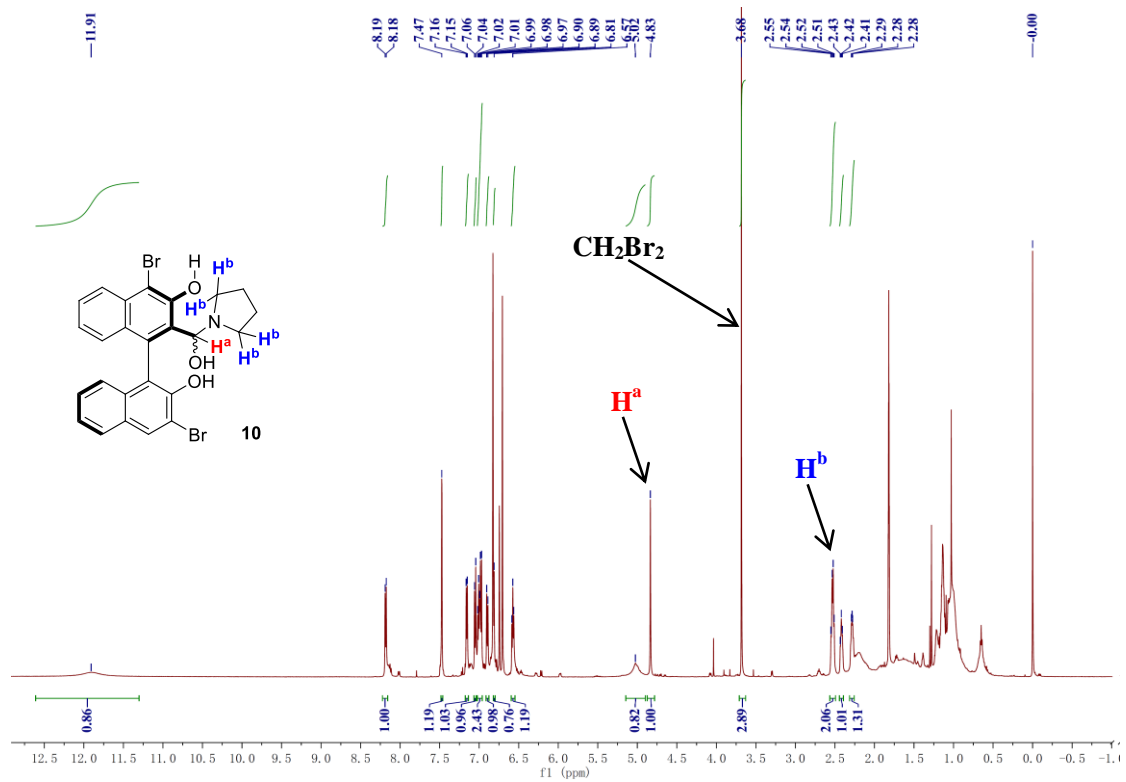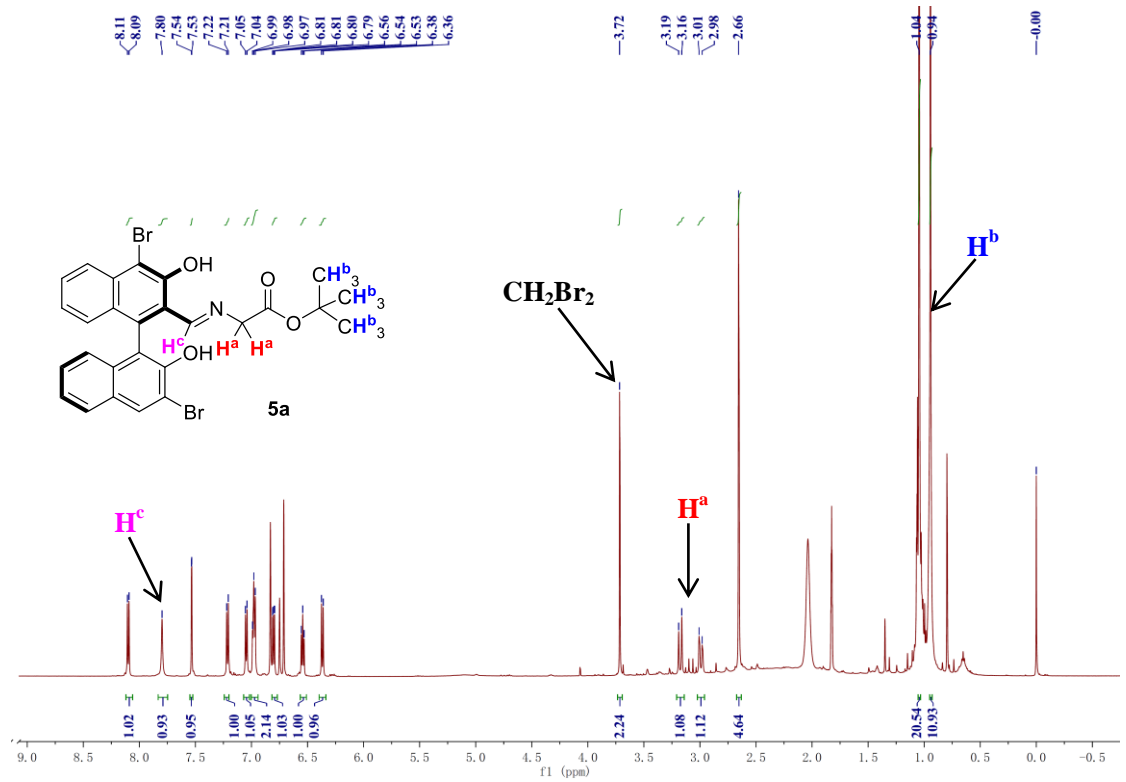



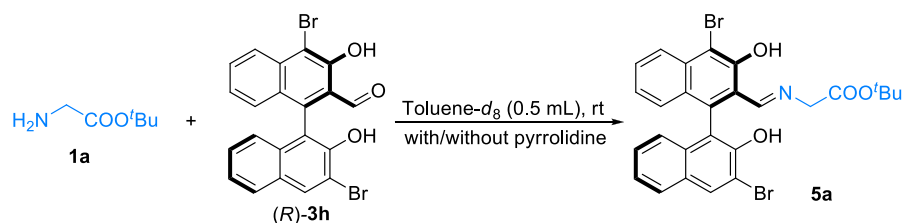

**The reaction of (R)-3h and 1a with and without pyrrolidine.** Add (R)-3h (9.4 mg, 0.02 mmol), 1a (8.7 mg, 0.06 mmol), CH<sub>2</sub>Br<sub>2</sub> (3.5 mg, 0.02 mmol), pyrrolidine (0.7 mg, 0.01 mmol) and toluene-*d*<sub>8</sub> (0.5 mL) to a dry and clean NMR tube. After shaking the mixture several times at room temperature, the yield of 5a was immediately determined by <sup>1</sup>H NMR using CH<sub>2</sub>Br<sub>2</sub> as an internal standard.

Following the above procedure, the reaction of (R)-3h and 1a was carried out in the absence of pyrrolidine, and the yield of 5a was immediately determined by <sup>1</sup>H NMR using CH<sub>2</sub>Br<sub>2</sub> as an internal standard.

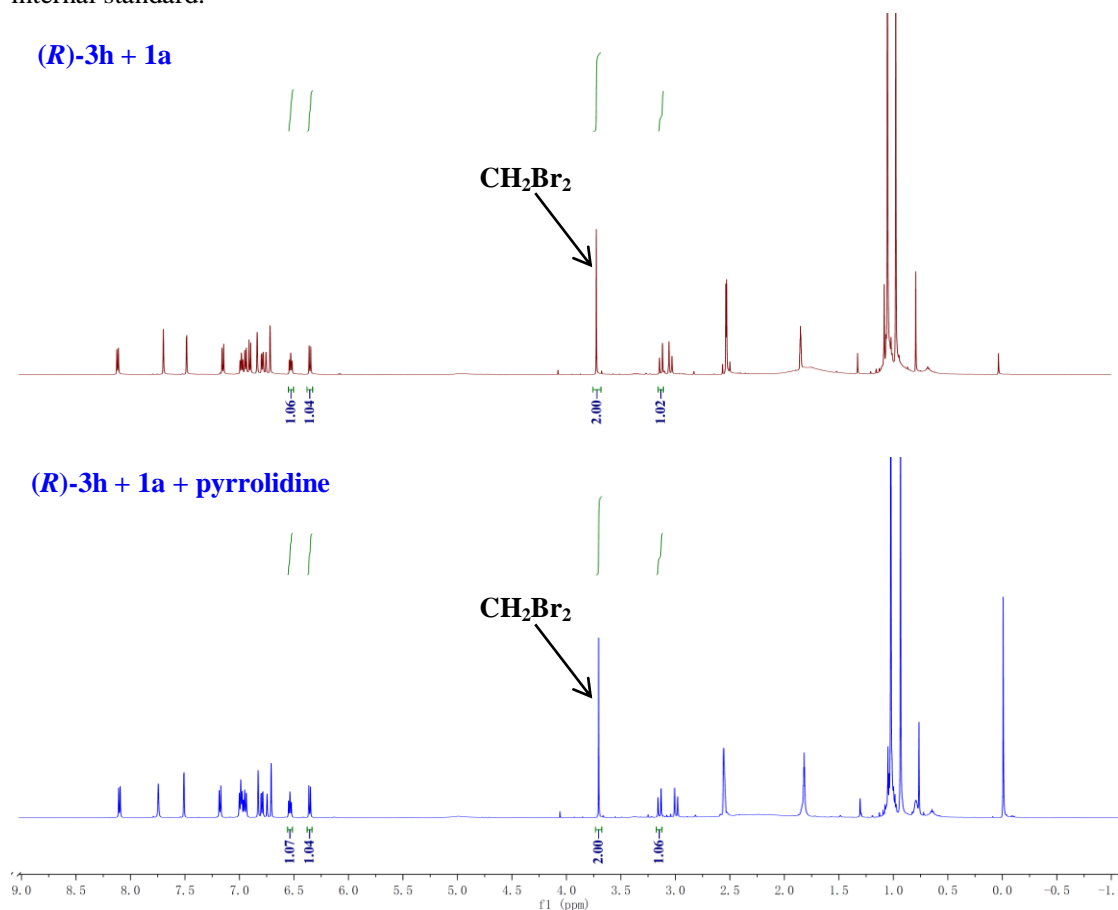

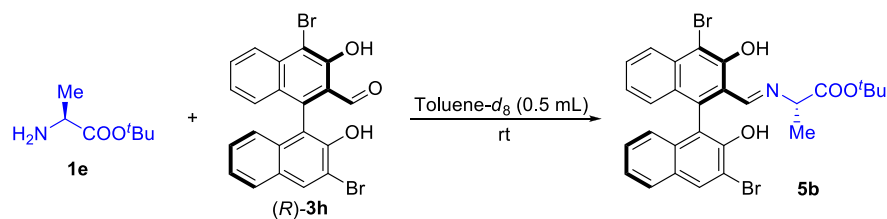

**The reaction of (R)-3h and 1e.** Add (R)-3h (9.4 mg, 0.02 mmol), 1e (8.7 mg, 0.06 mmol),  $\text{CH}_2\text{Br}_2$  (3.5 mg, 0.02 mmol) and toluene- $d_8$  (0.5 mL) to a dry and clean NMR tube. After shaking the mixture several times at room temperature, the yield of 5b was immediately determined by  $^1\text{H}$  NMR using  $\text{CH}_2\text{Br}_2$  as an internal standard.

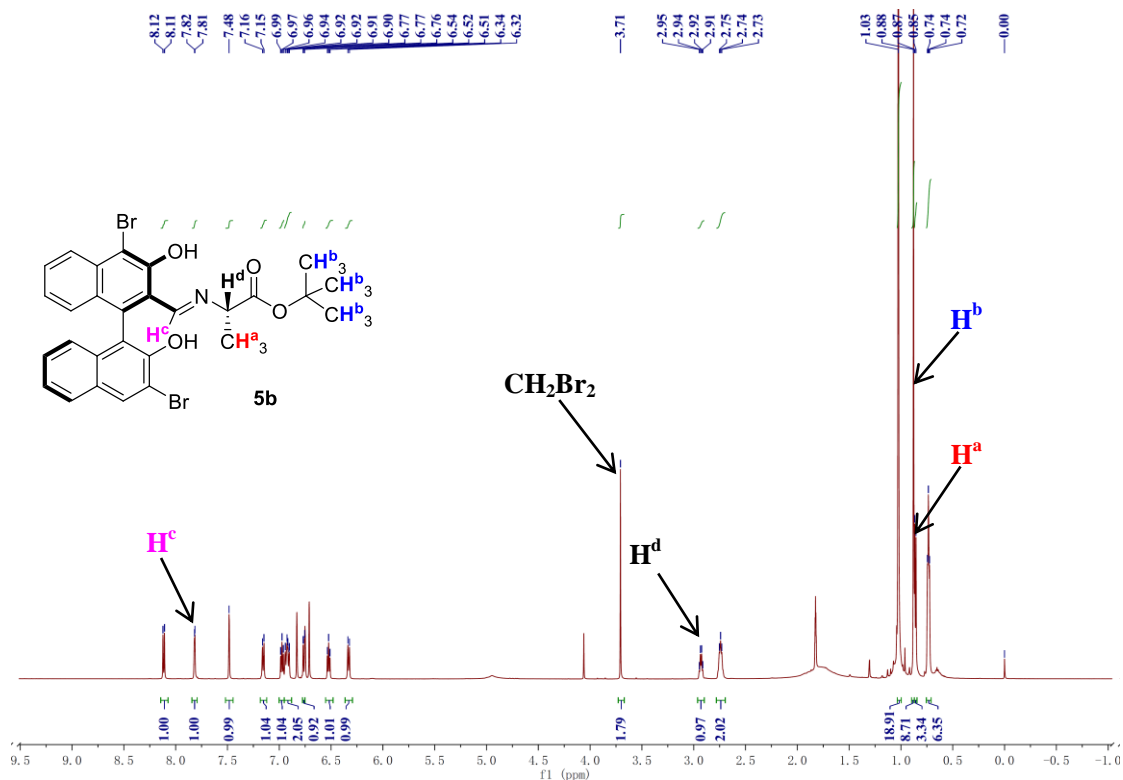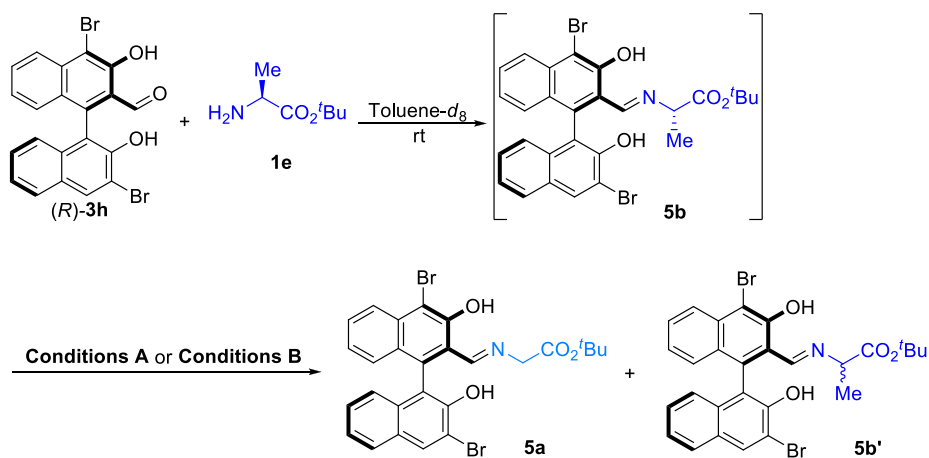

**Monitoring the amine exchange reaction of 1a and 5b.** Add (*R*)-**3h** (14.2 mg, 0.03 mmol), **1e** (13.1 mg, 0.09 mmol), CH<sub>2</sub>Br<sub>2</sub> (5.2 mg, 0.03 mmol) and toluene-*d*<sub>8</sub> (0.75 mL) to a dry and clean tube containing a magnetic stir bar and stir at room temperature for 5 min. Then proceed with the subsequent reaction according to conditions **A** or **B**.

**Condition A:** Add **1a** (11.8 mg, 0.09 mmol) to the above mixture and stir at room temperature. The reaction was stopped at 10, 20, 30, 70 or 250 min, and then the yield of **5a** and the de of **5b'** were determined by <sup>1</sup>H NMR using CH<sub>2</sub>Br<sub>2</sub> as an internal standard.

**Condition B:** Add **1a** (11.8 mg, 0.09 mmol) and pyrrolidine (1.1 mg, 0.015 mmol) to the above mixture and stir at room temperature. The reaction was stopped at 10, 20, 30, 70 or 250 min, and then the yield of **5a** and the de of **5b'** were determined by <sup>1</sup>H NMR using CH<sub>2</sub>Br<sub>2</sub> as an internal standard.

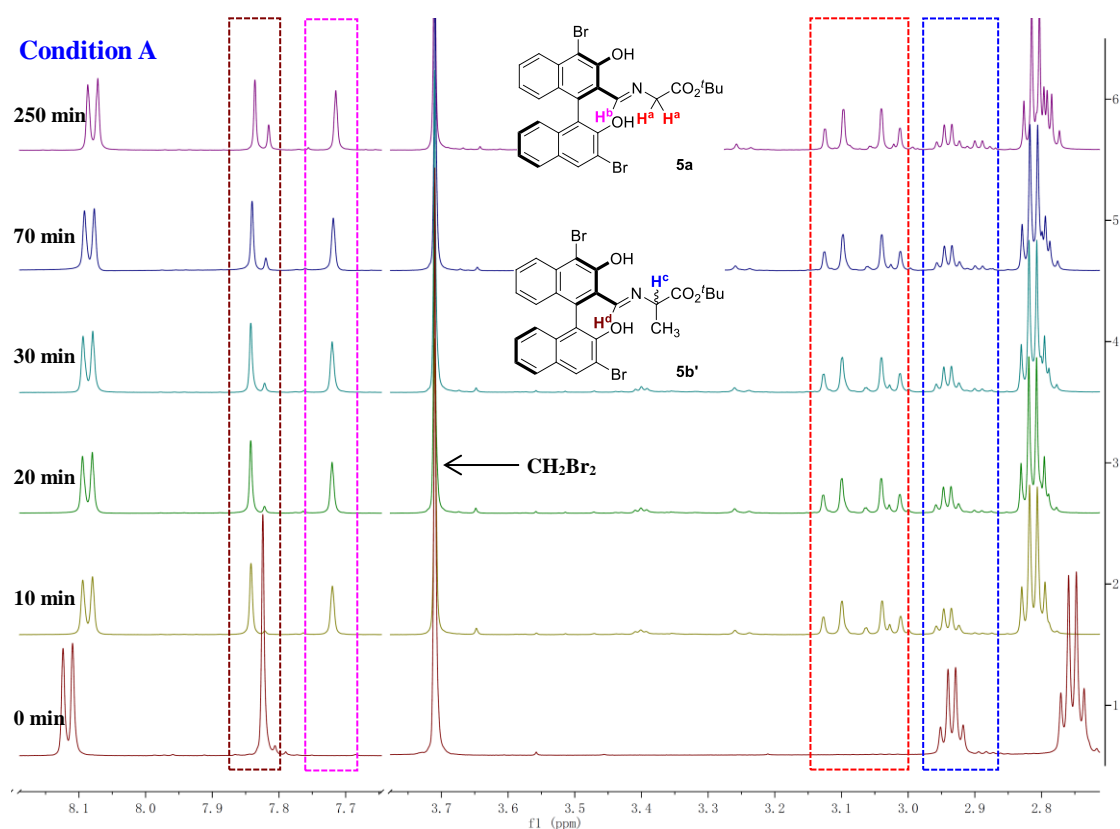

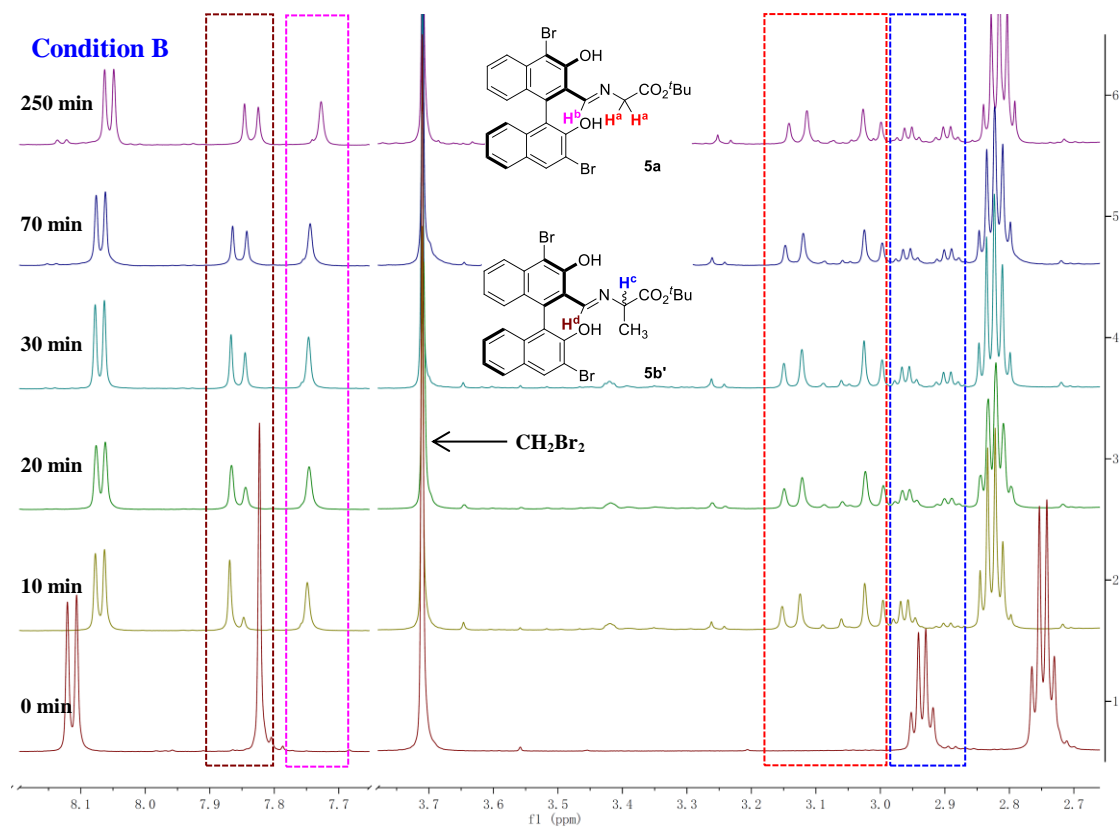

**Table S4: Yields of 5a and de values of 5b' versus the reaction time**

| Time (min) | Yield of 5a (%) |             | De of 5b' (%) |             |
|------------|-----------------|-------------|---------------|-------------|
|            | Condition A     | Condition B | Condition A   | Condition B |
| 0          | 0               | 0           | 92            | 92          |
| 10         | 46              | 43          | 90            | 66          |
| 20         | 47              | 43          | 84            | 28          |
| 30         | 47              | 44          | 76            | 14          |
| 70         | 50              | 44          | 62            | 0           |
| 250        | 50              | 43          | 48            | 0           |

## 6. X-Ray Structure of 4b

The absolute structure of **4b** was determined by X-ray diffraction analysis.

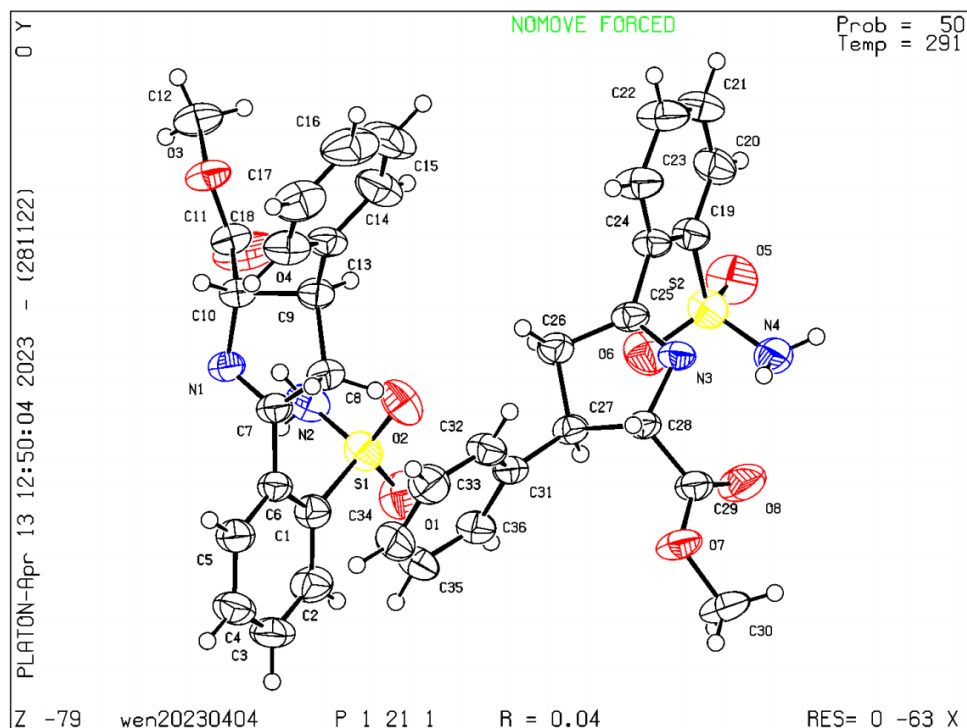

|                             |                                                             |
|-----------------------------|-------------------------------------------------------------|
| Chemical Formula            | $2(\text{C}_{18}\text{H}_{18}\text{N}_2\text{O}_4\text{S})$ |
| Formula weight              | 358.40                                                      |
| Temperature                 | 291 K                                                       |
| Wavelength                  | 1.54184                                                     |
| Crystal system, space group | Monoclinic, P 1 21 1                                        |
| a, Å                        | 11.11448(15)                                                |
| b, Å                        | 7.69074(13)                                                 |
| c, Å                        | 20.9891(3)                                                  |
| $\alpha$ , °                | 90                                                          |
| $\beta$ , °                 | 98.9225(14)                                                 |
| $\gamma$ , °                | 90                                                          |
| V, Å <sup>3</sup>           | 1772.41(5)                                                  |
| F (000)                     | 752.0                                                       |
| Z, Calculated density       | 4, 1.343 g/cm <sup>3</sup>                                  |

## 7. References

- [1] Feng, X.; Zhou, Z.; Ma, C.; Yin, X.; Li, R.; Dong, L.; Chen, Y.-C. *Angew. Chem. Int. Ed.* **2013**, *52*, 14172-14176.
- [2] Dudhe, P.; Venkatasubbaiah, K.; Pathak, B.; Chelvam, Venkatesh. *Org. Biomol. Chem.* **2020**, *18*, 1582-1587.
- [3] J. Zhang, M. Liu, C. Li, Y.-J. Xu, L. Dong, *Org. Chem. Front.* **2020**, *7*, 420-424.
- [4] W. Wen, L. Chen, M.-J. Luo, Y. Zhang, Y.-C. Chen, Q. Ouyang, Q.-X. Guo, *J. Am. Chem. Soc.* **2018**, *140*, 9774-9780.

## 8. The spectrums of $^1\text{H}$ NMR and $^{13}\text{C}$ NMR

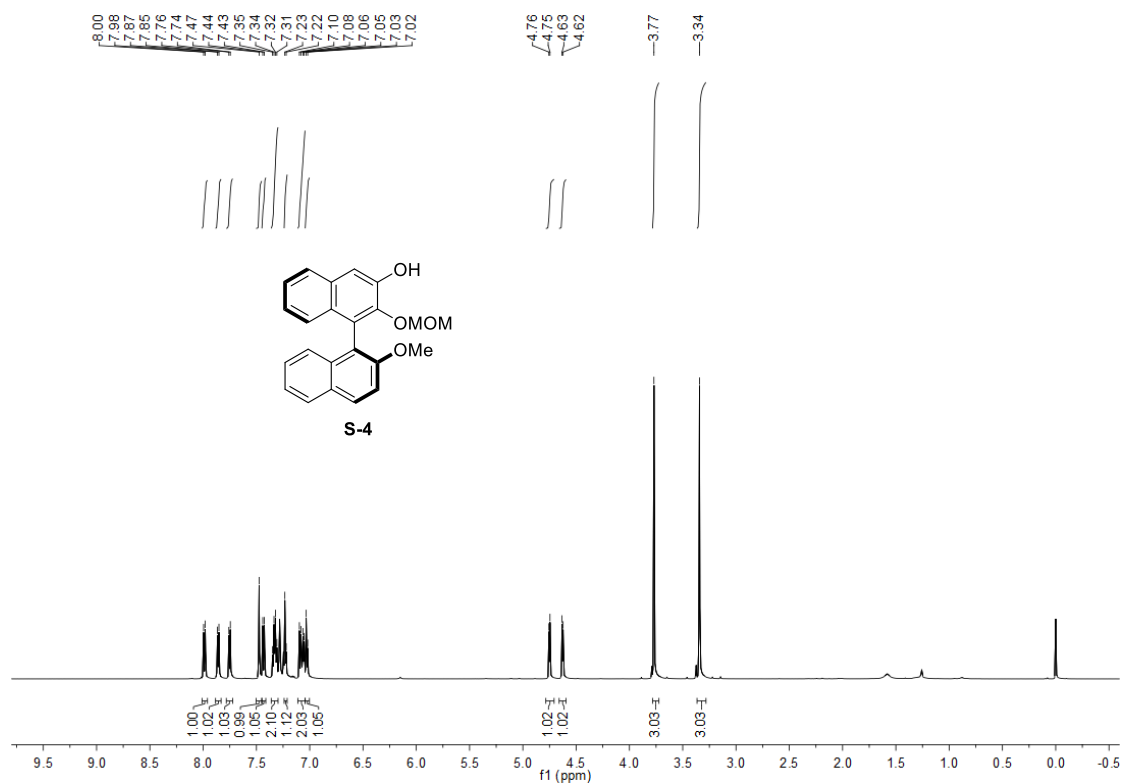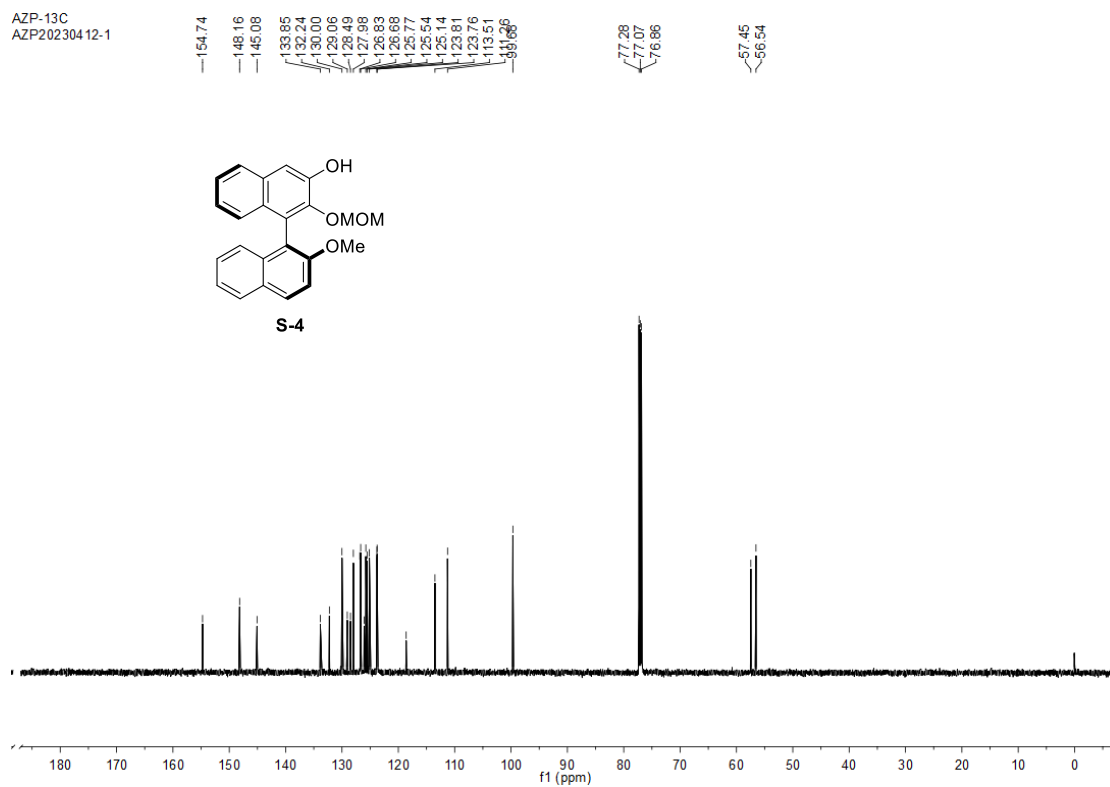

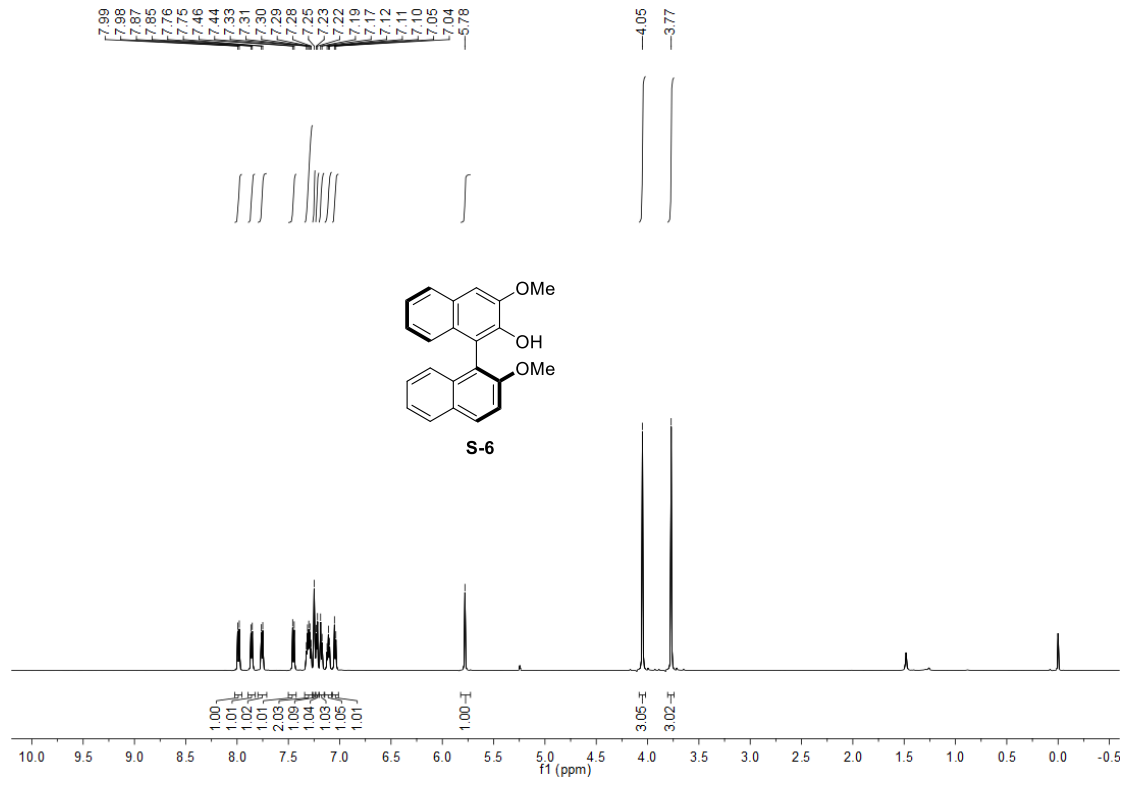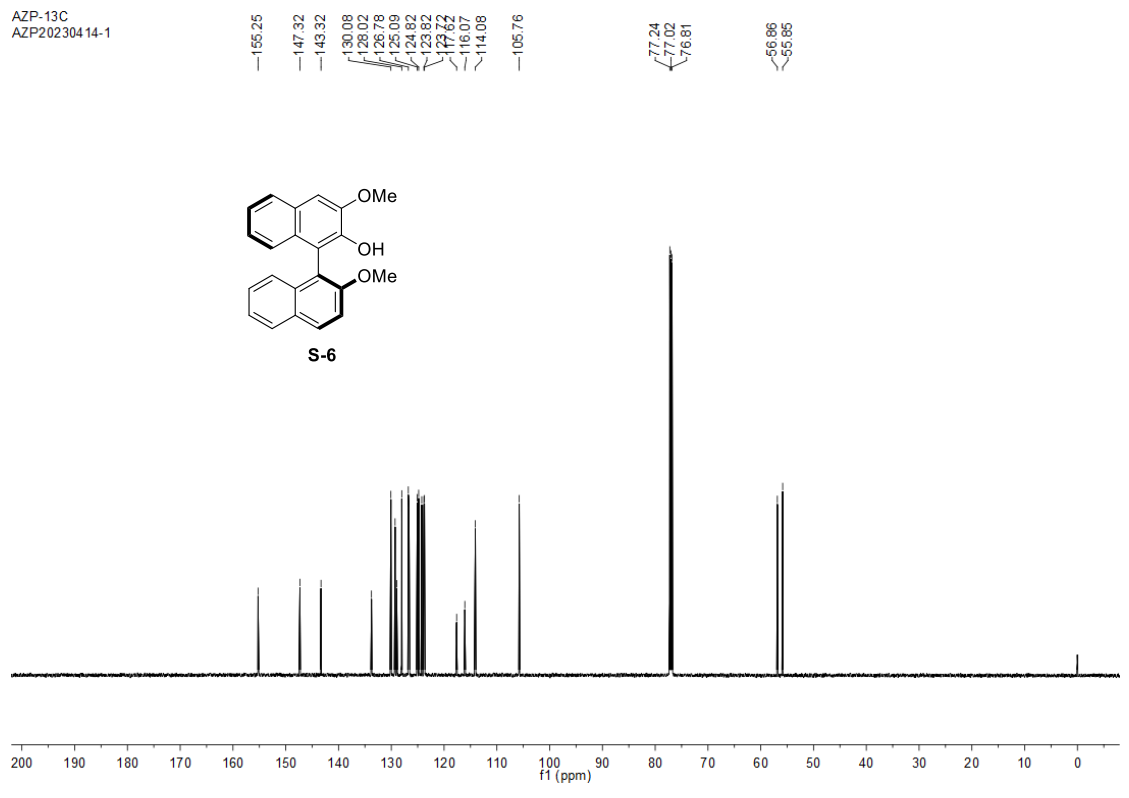

AZP-1H  
AZP20230416-1

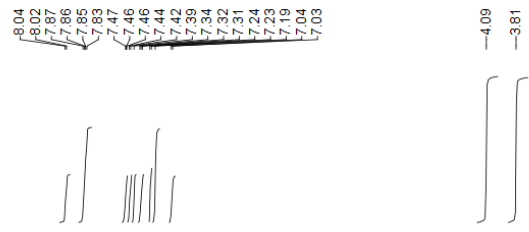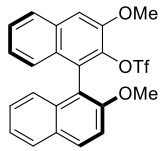

S-7

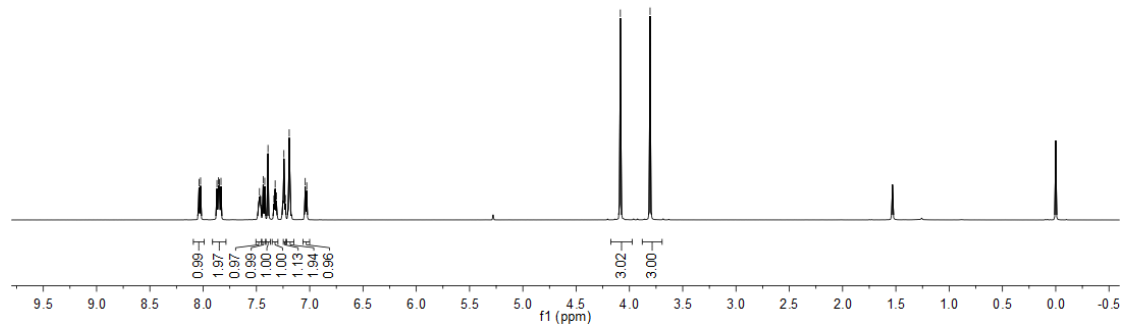

AZP-13C  
AZP20230416-1

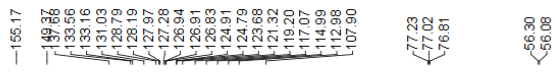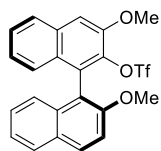

S-7

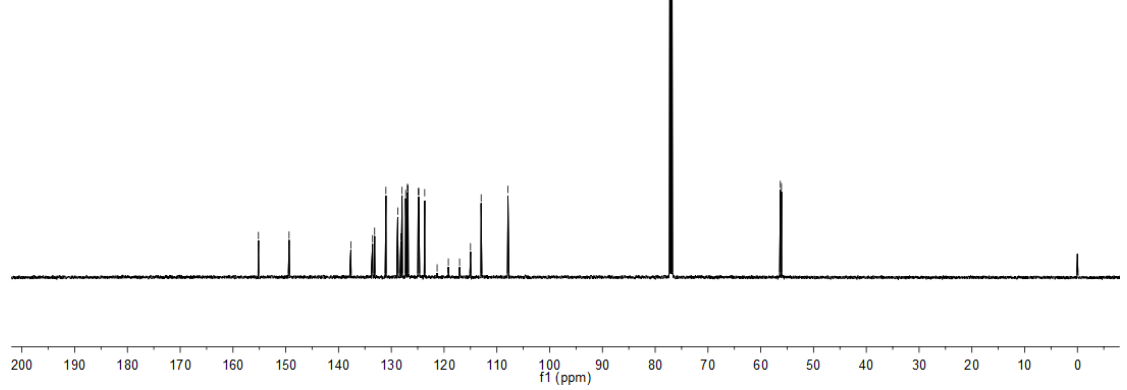



AZP-1H  
AZP20221018-2

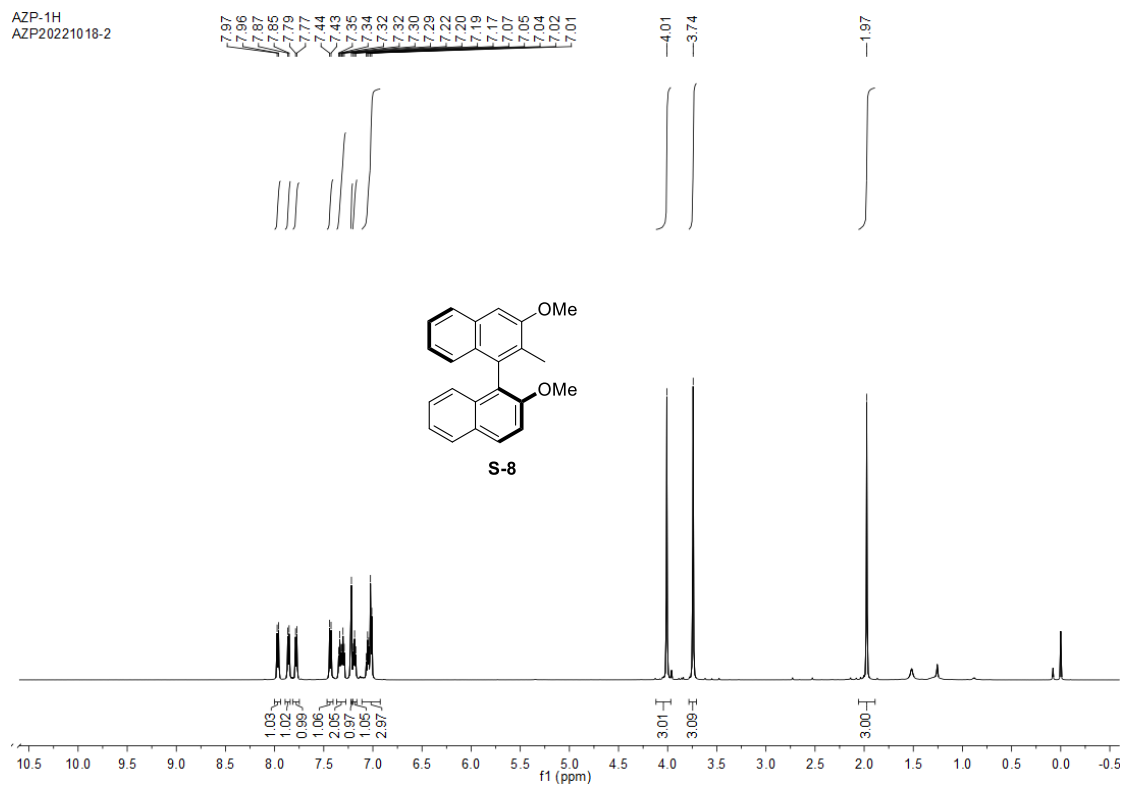

AZP-13C  
AZP20221018-2

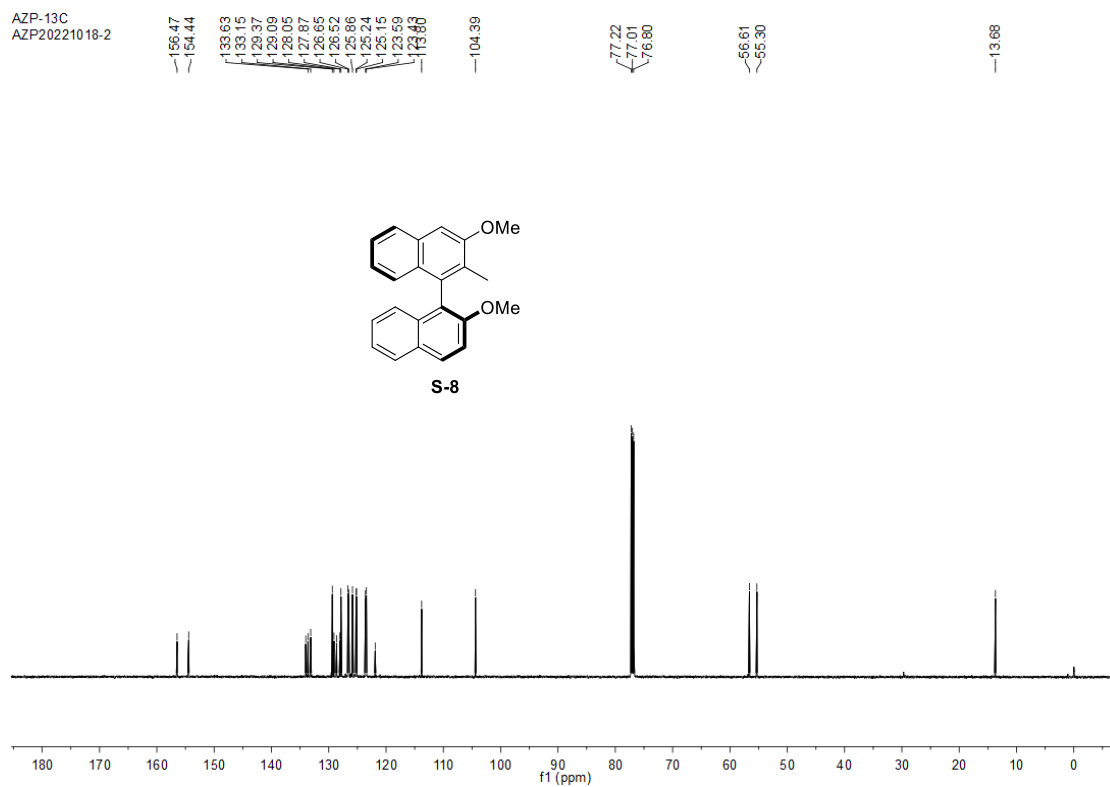

AZP-1H  
AZP20230420-1

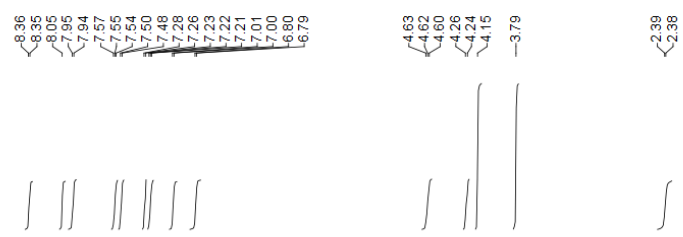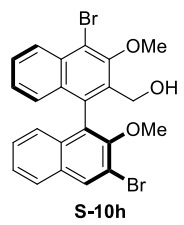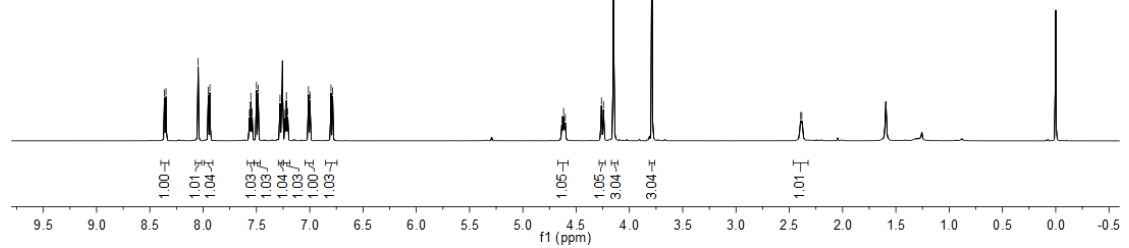

AZP-13C  
AZP20230420-1

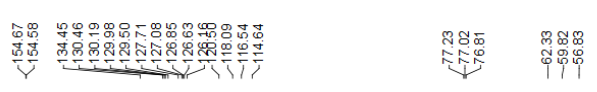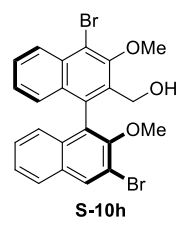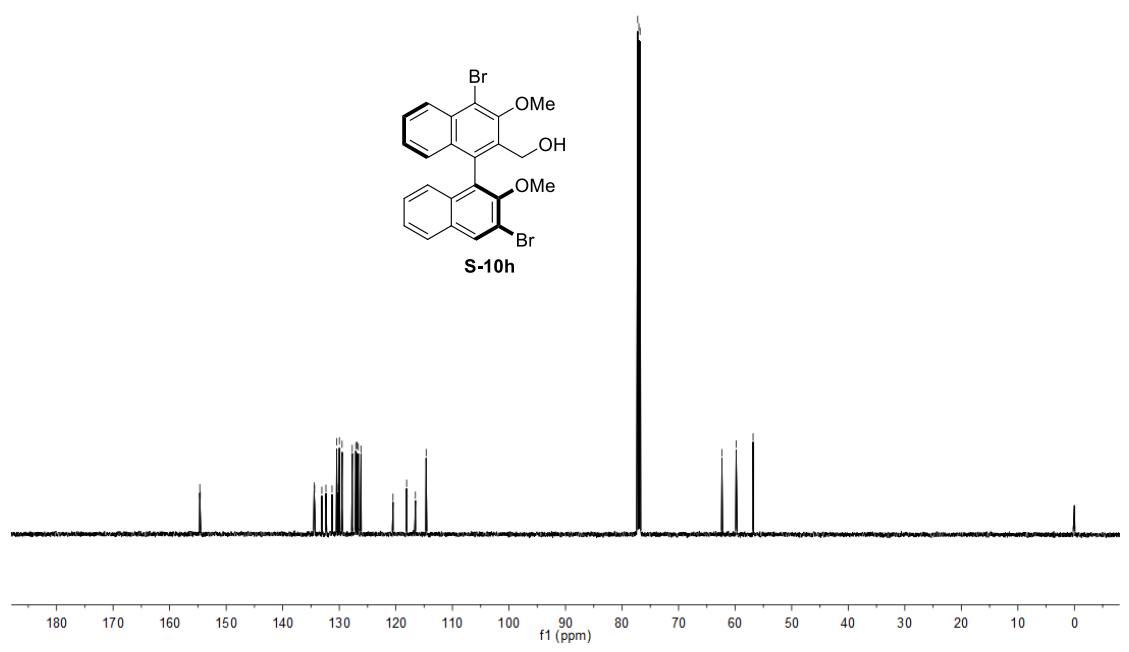

AZP-1H  
AZP20230328-1

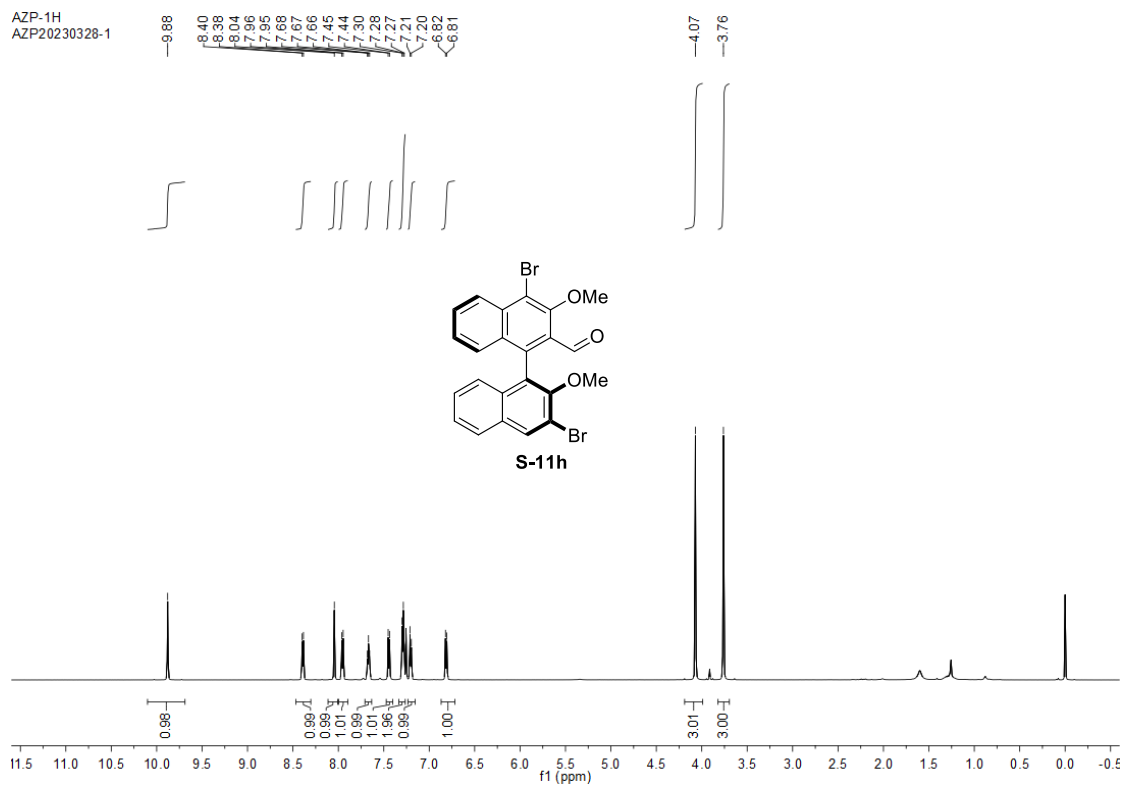

AZP-13C  
AZP20230328-

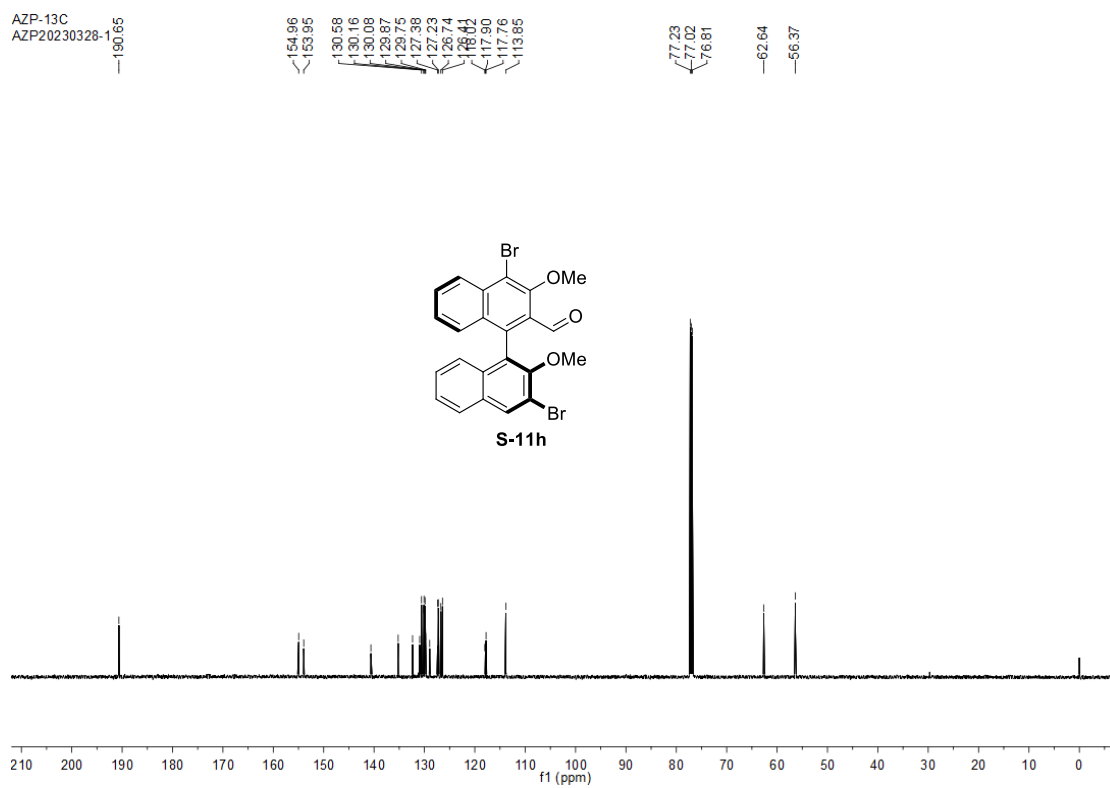

AZP-1H  
AZP20220831-1

11.90

9.54

8.32  
8.31  
8.06  
7.91  
7.89  
7.35  
7.33  
7.32  
7.28  
7.26  
7.24  
6.83  
6.81

5.30

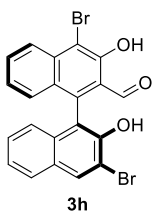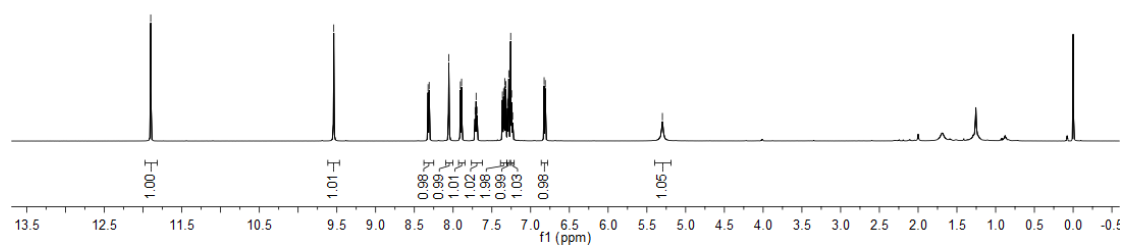

AZP-13C  
AZP20220831-

197.05

153.66

151.99  
140.42  
136.97  
132.81  
132.05  
131.07  
130.59  
130.27  
129.83  
127.89  
127.17  
126.67  
126.25  
125.77  
120.52  
118.69  
118.10  
113.06  
108.85

77.23

77.02

76.81

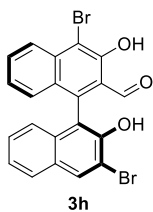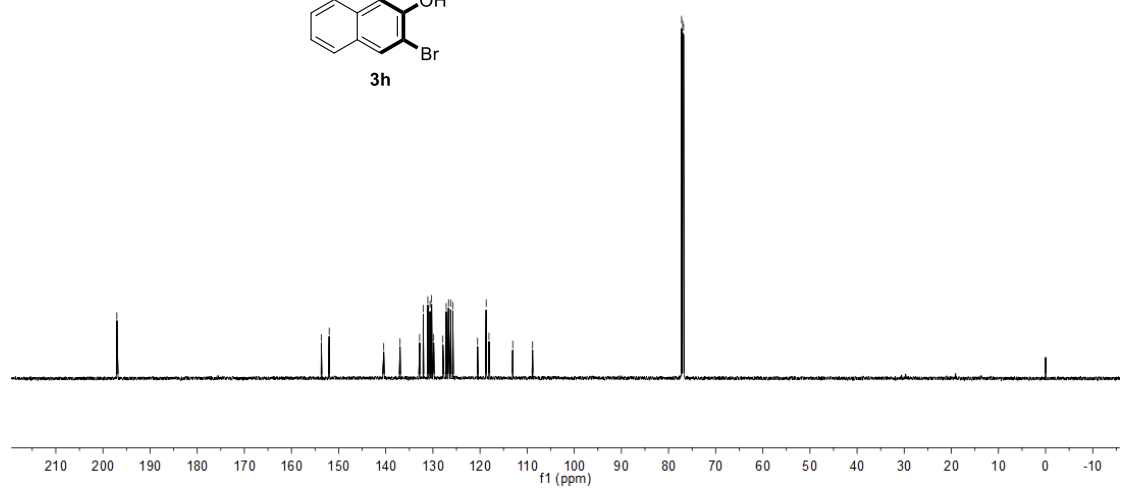

AZP-1H  
AZP20230507-1

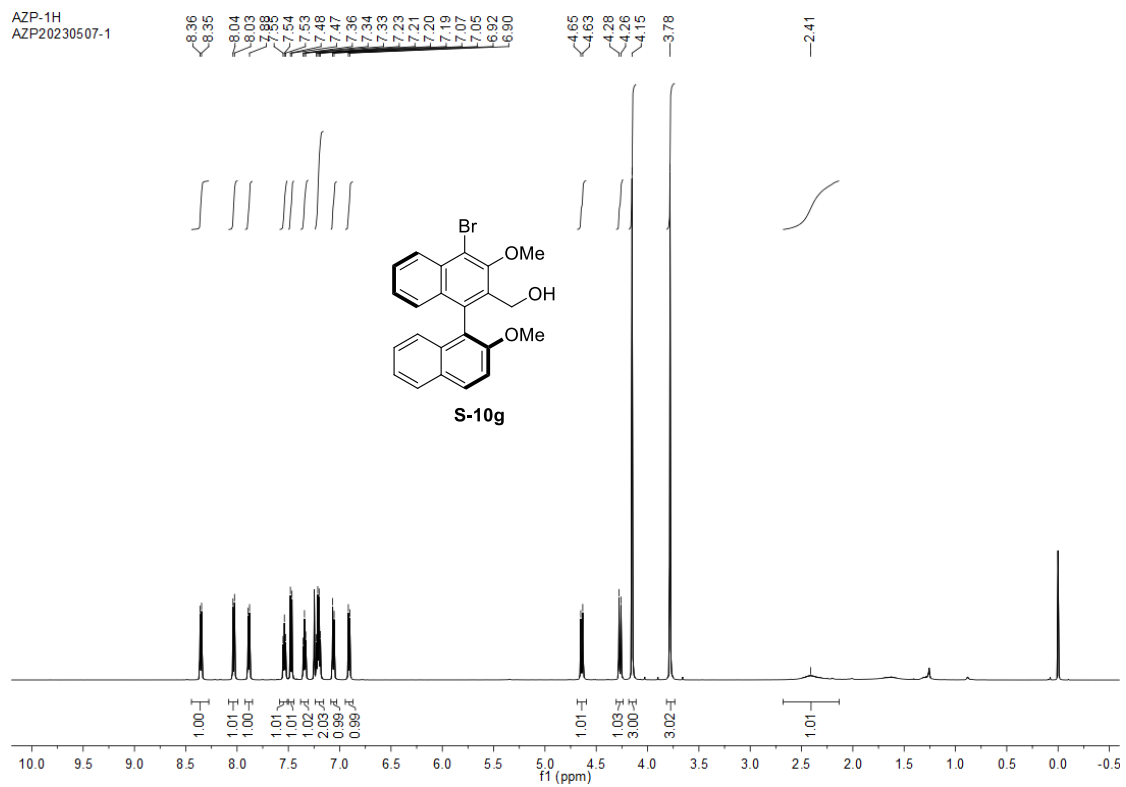

AZP-13C  
AZP20230507-1

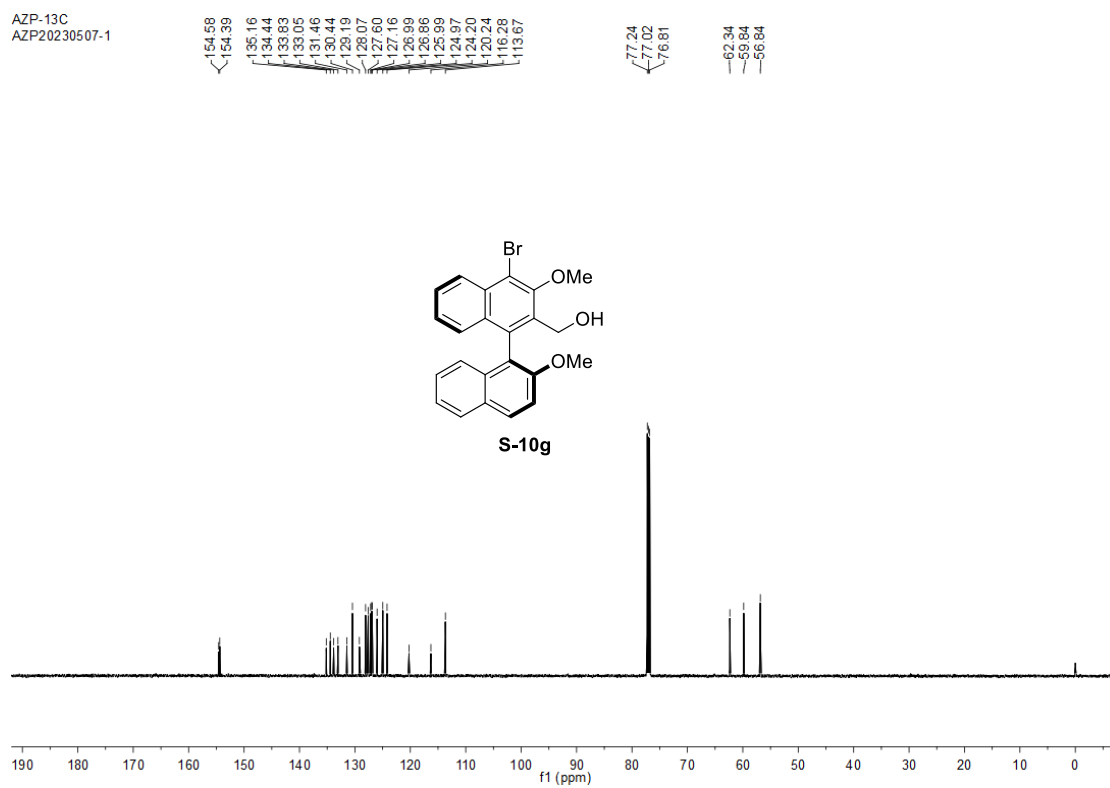

AZP-1H  
AZP20230507-2

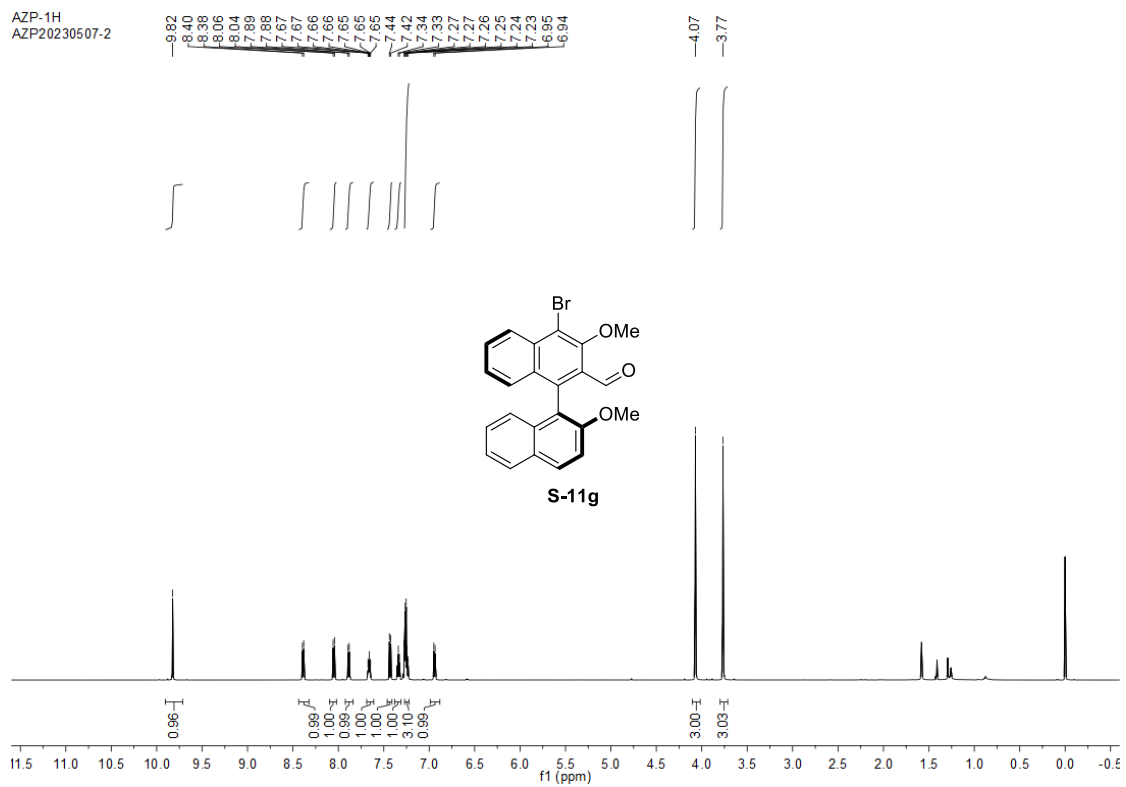

AZP-13C  
AZP20230507-2

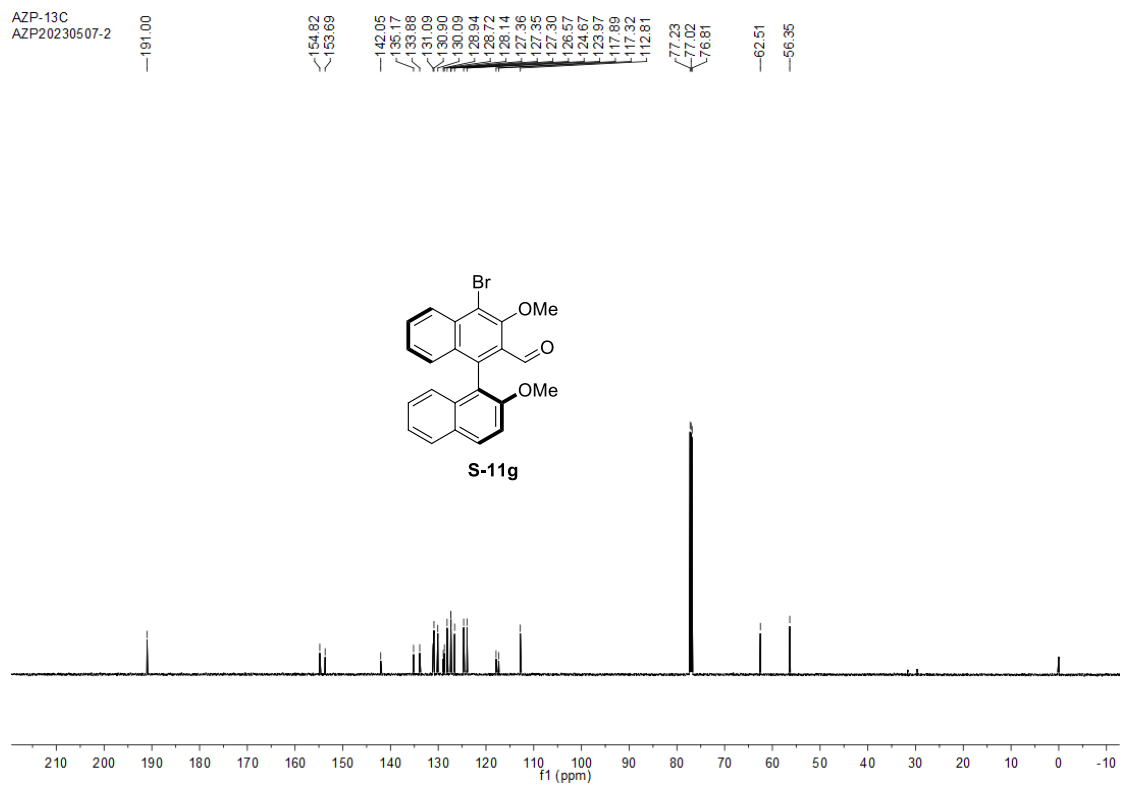

AZP-1H  
AZP20230507-3

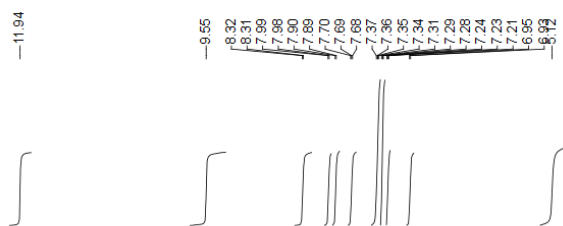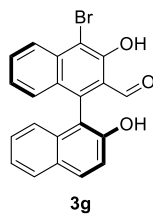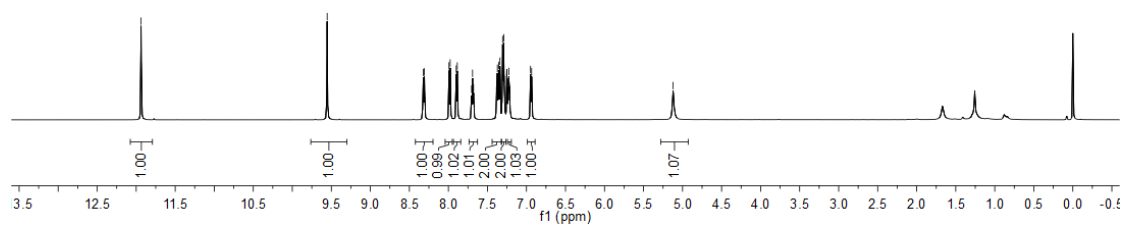

AZP-13C  
AZP20230507-3

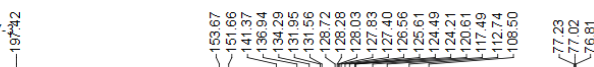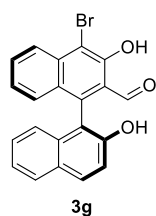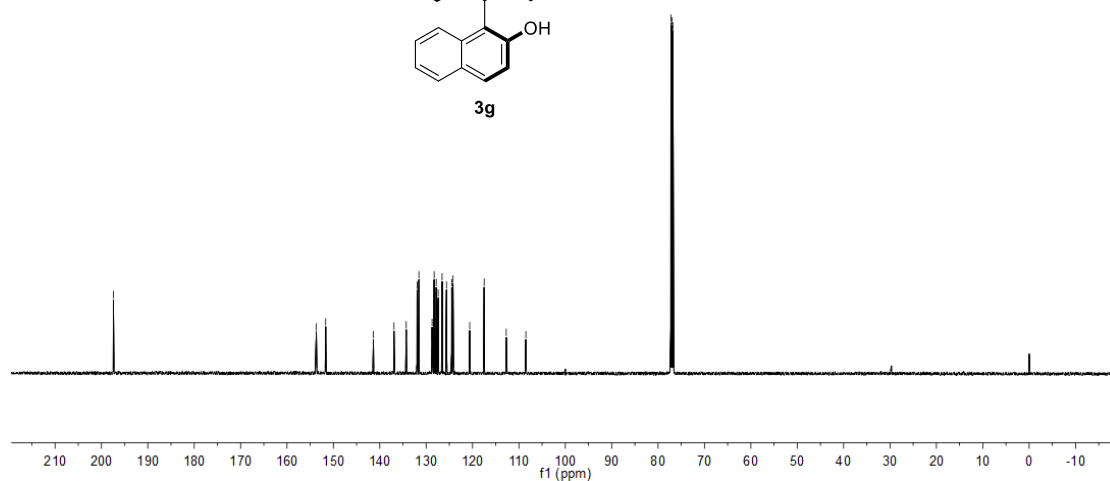

AZP-1H  
AZP20221201-1

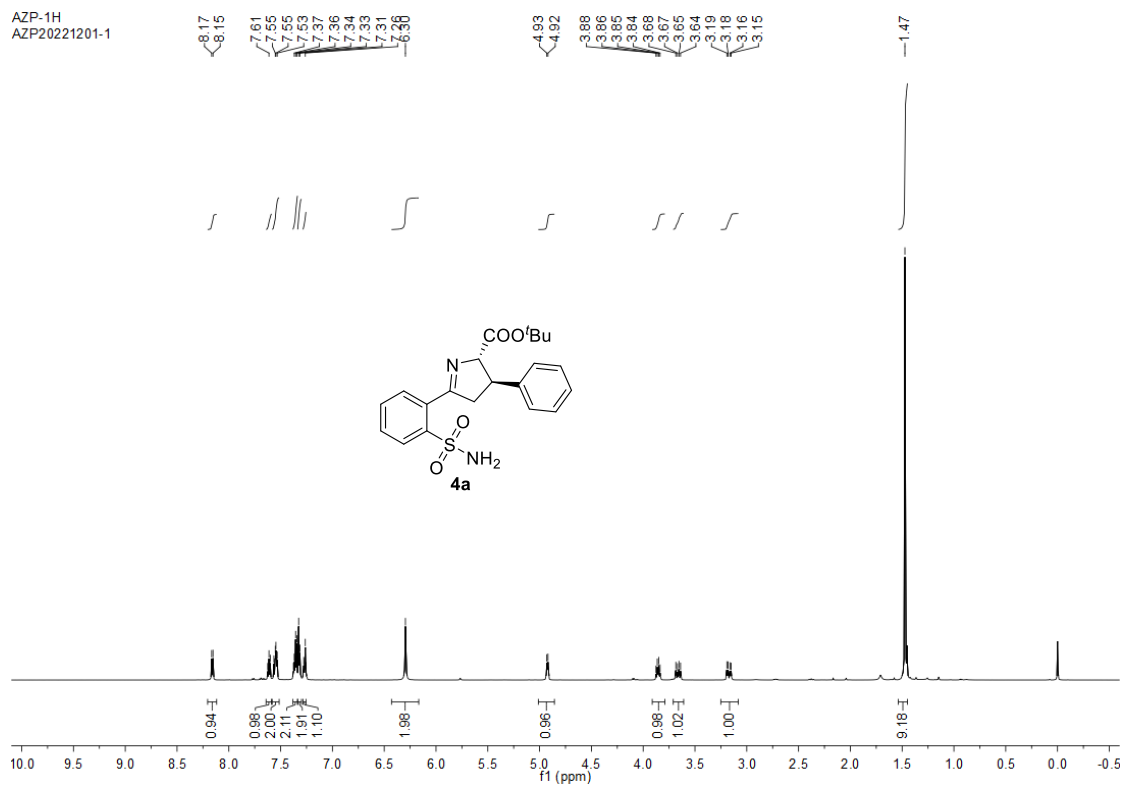

AZP-13C  
AZP20221201-1

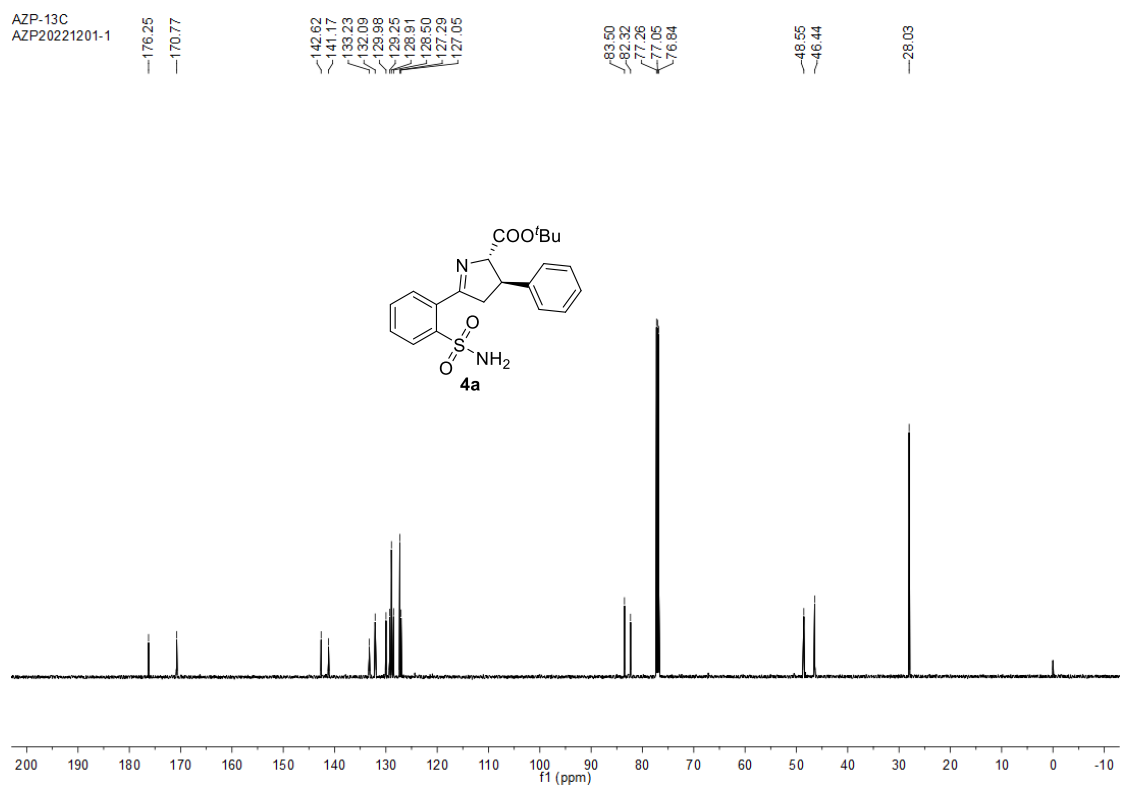



AZP-1H  
AZP20221201-2

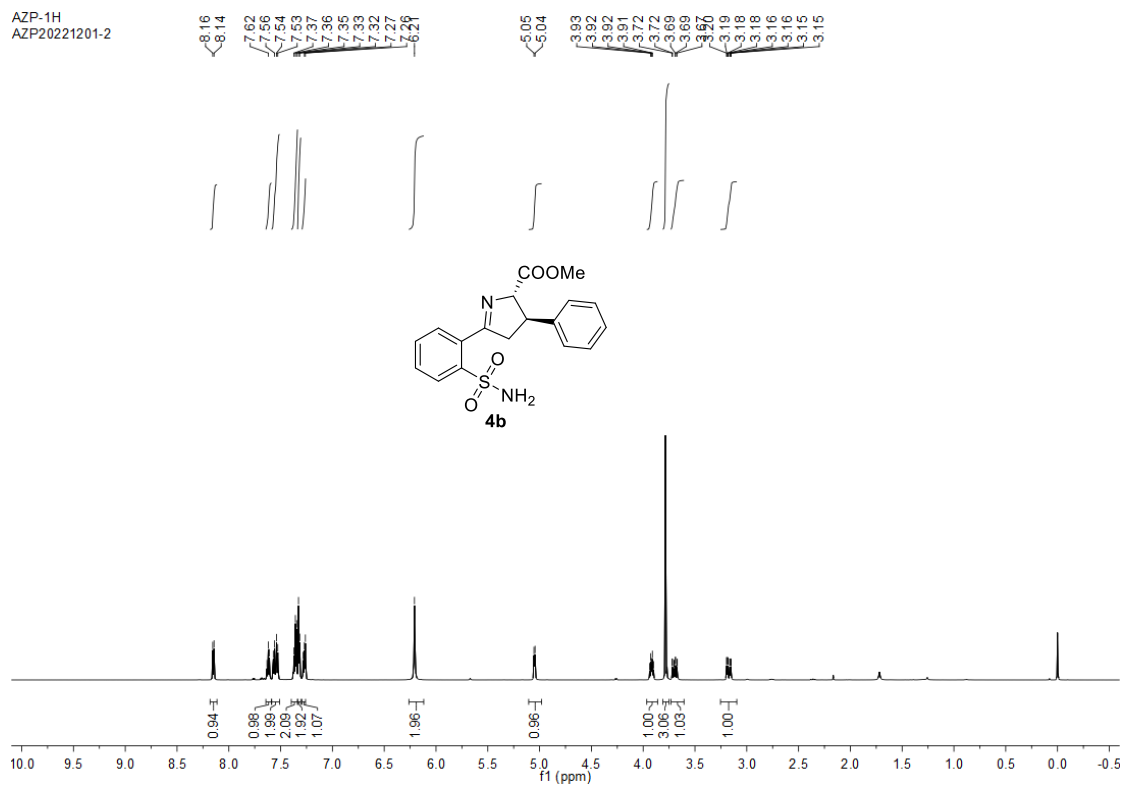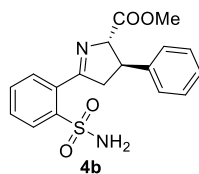

AZP-13C  
AZP20221201-2

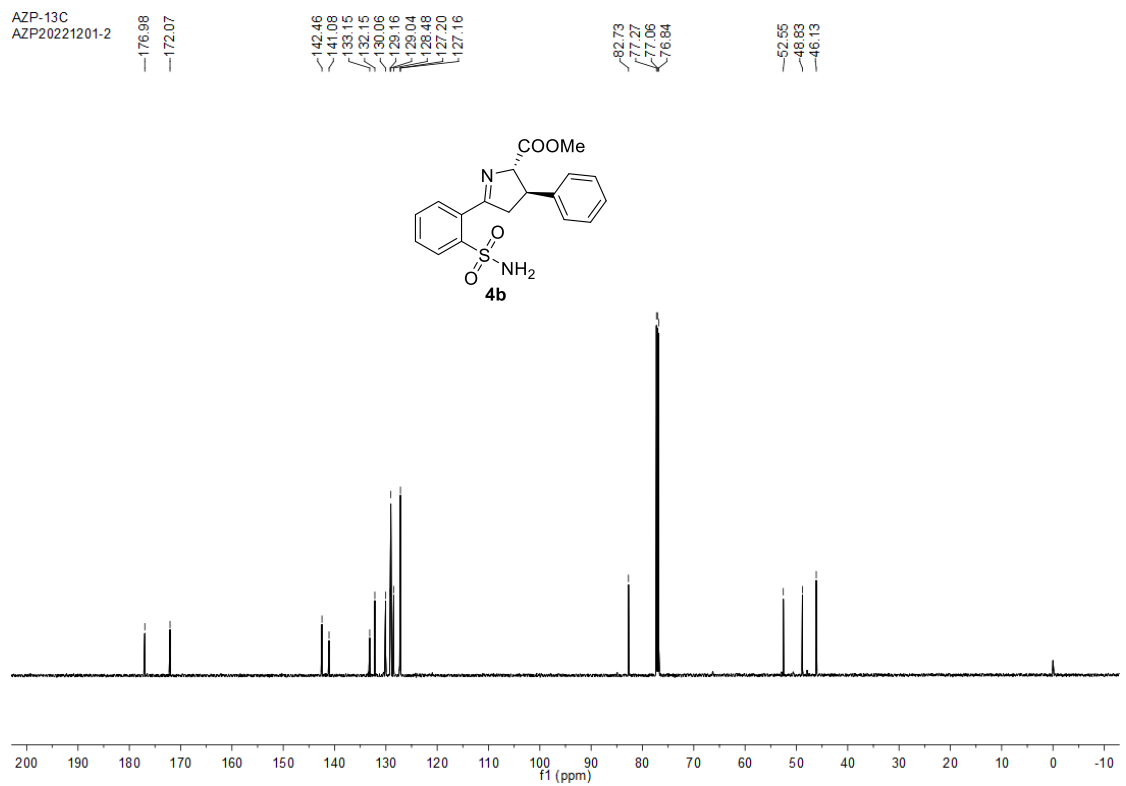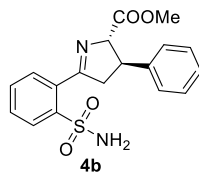

AZP-1H  
AZP20221202-1

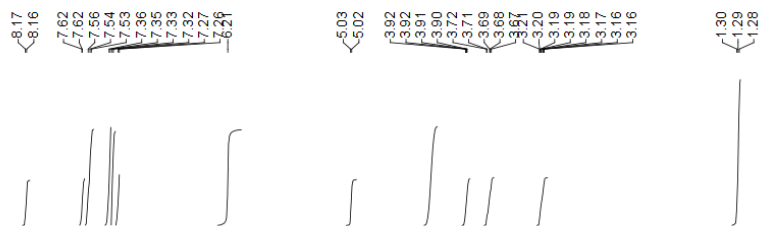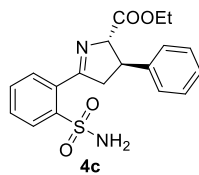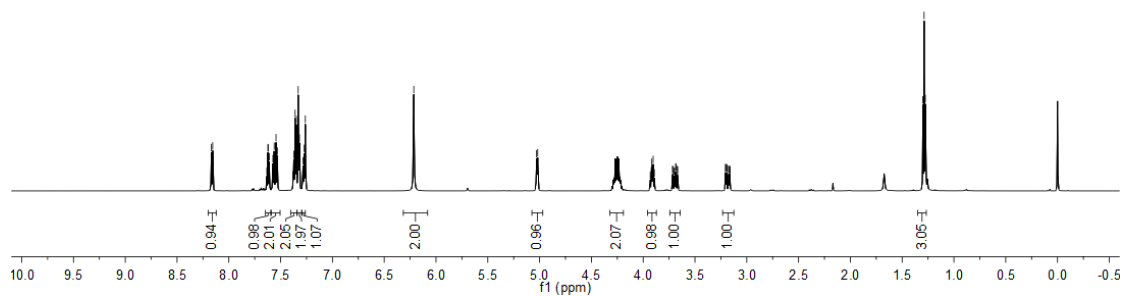

AZP-13C  
AZP20221202-1

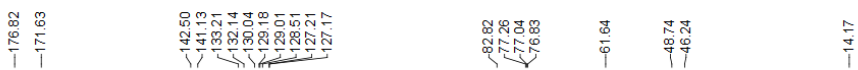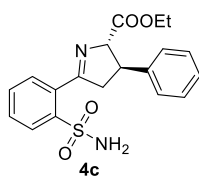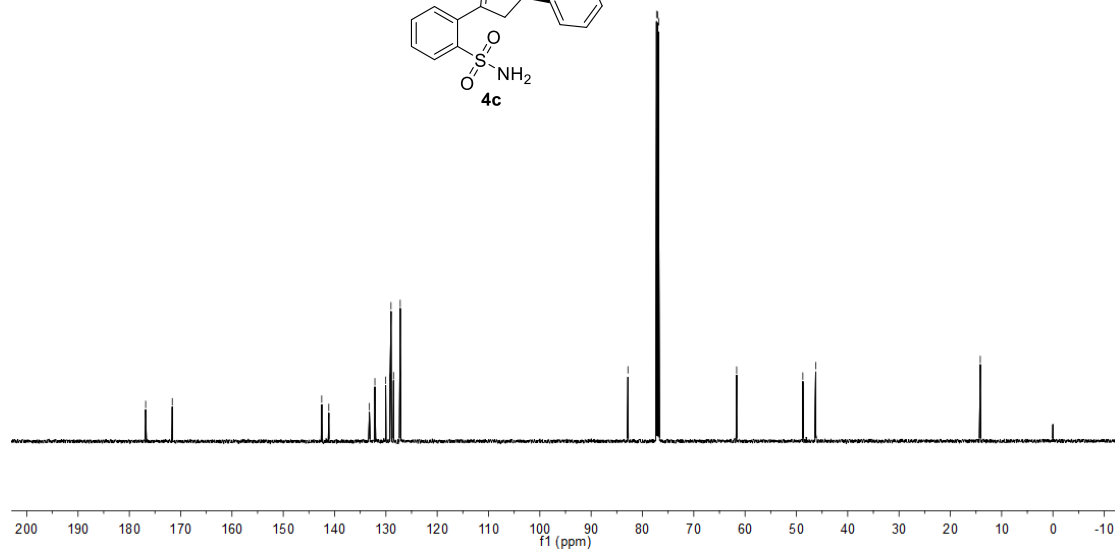

AZP-1H  
AZP20221202-2

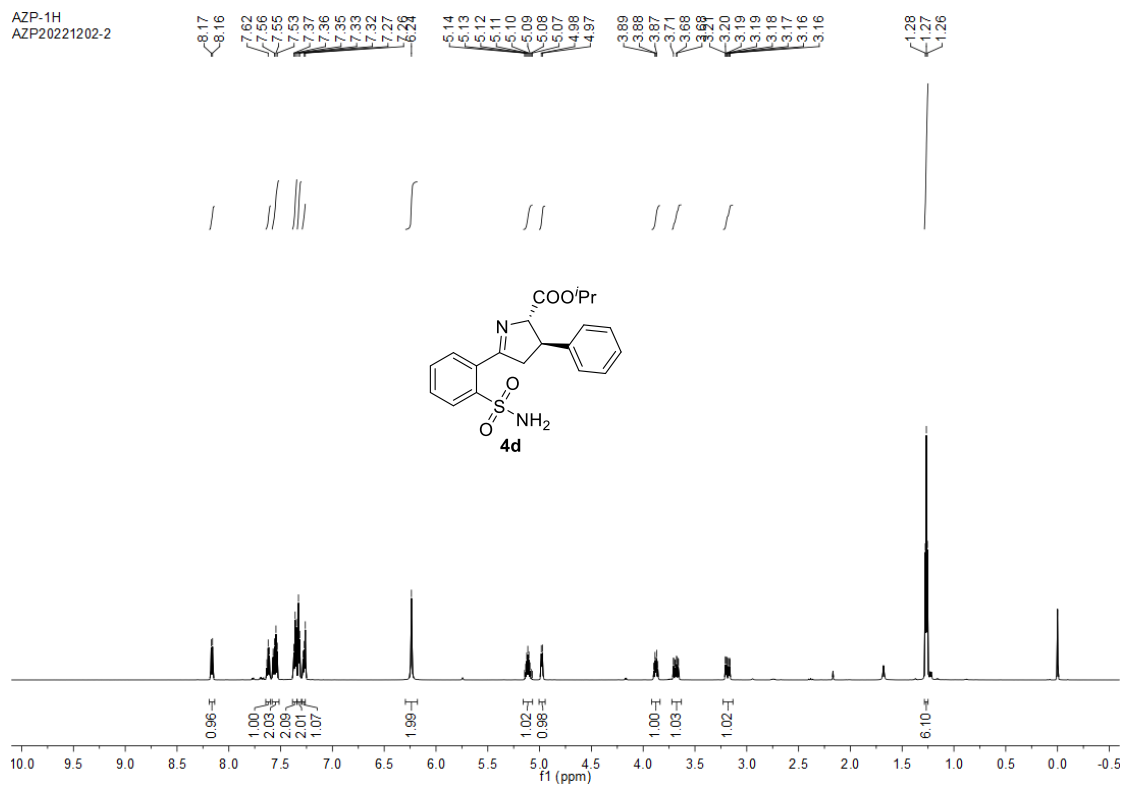

AZP-13C  
AZP20221202-2

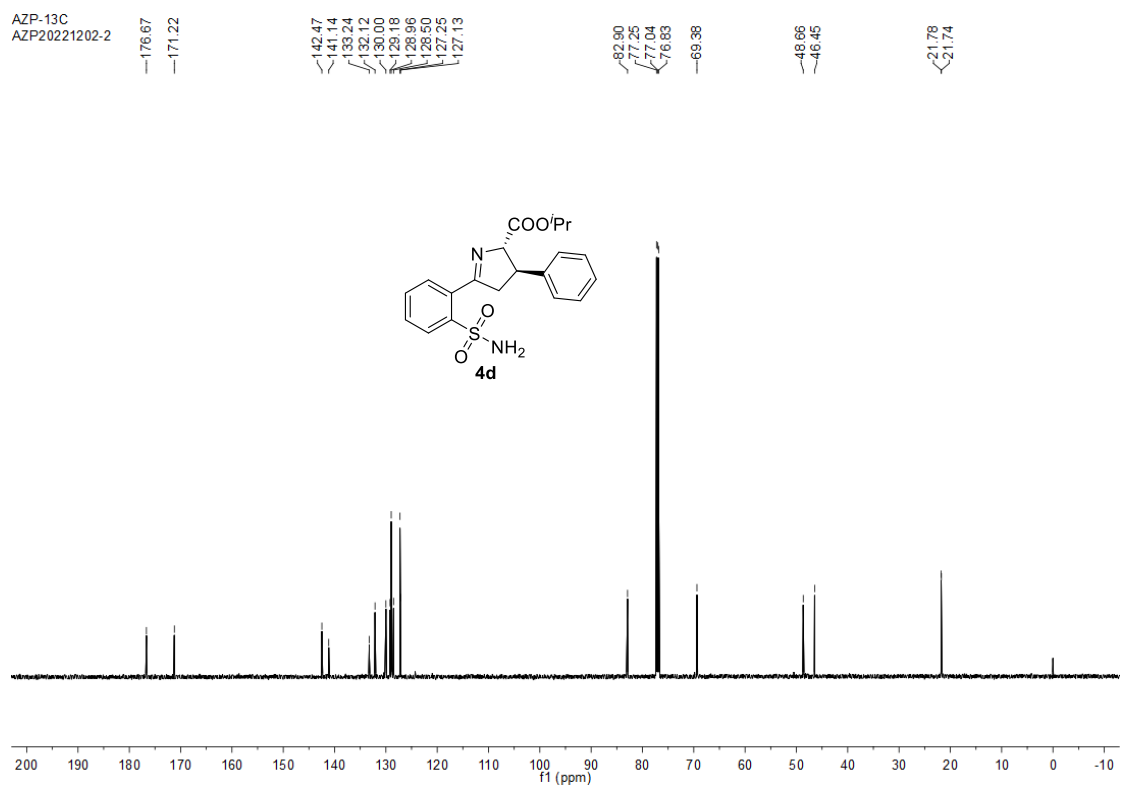

AZP-1H  
AZP20230108-1

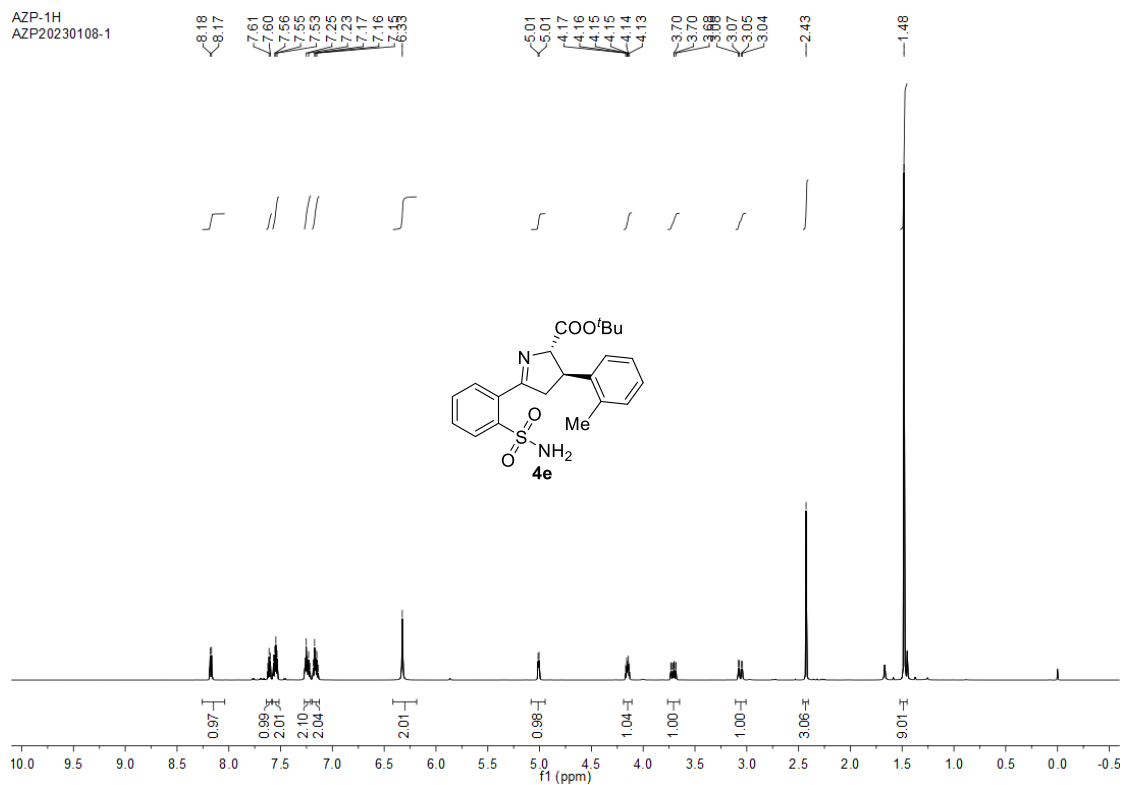

AZP-13C  
AZP20230108-1

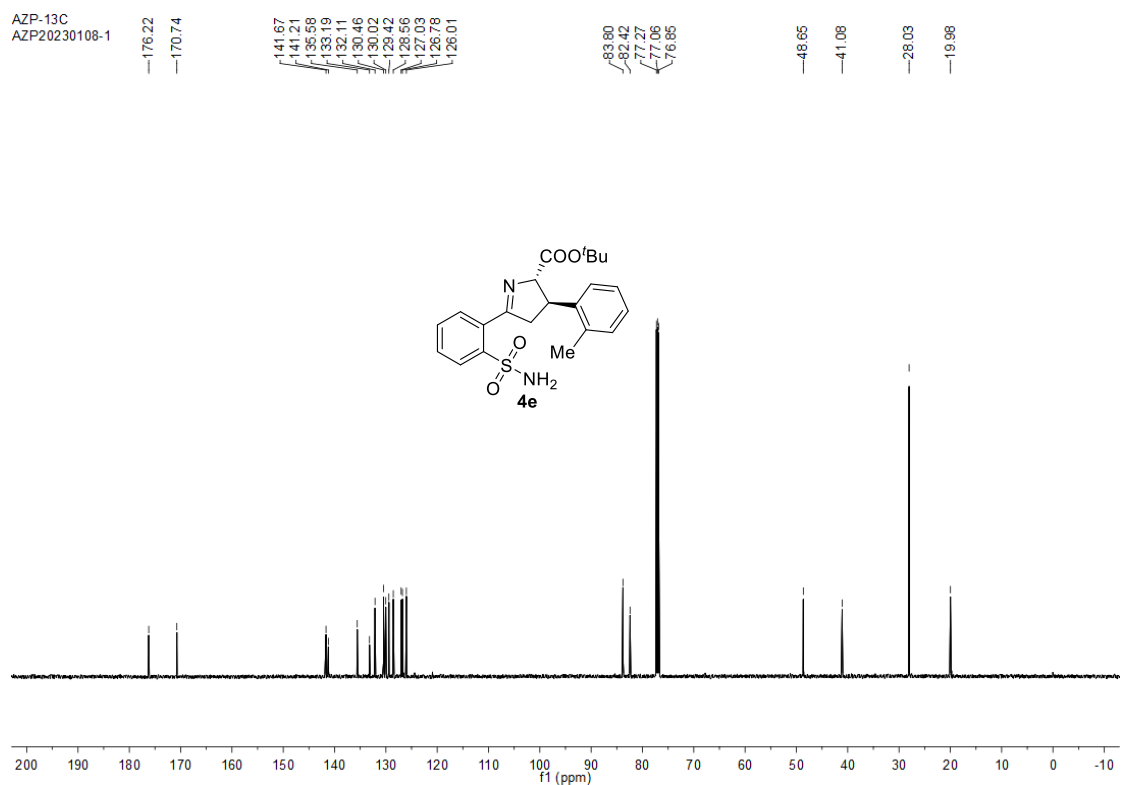

AZP-1H  
AZP20230215-1

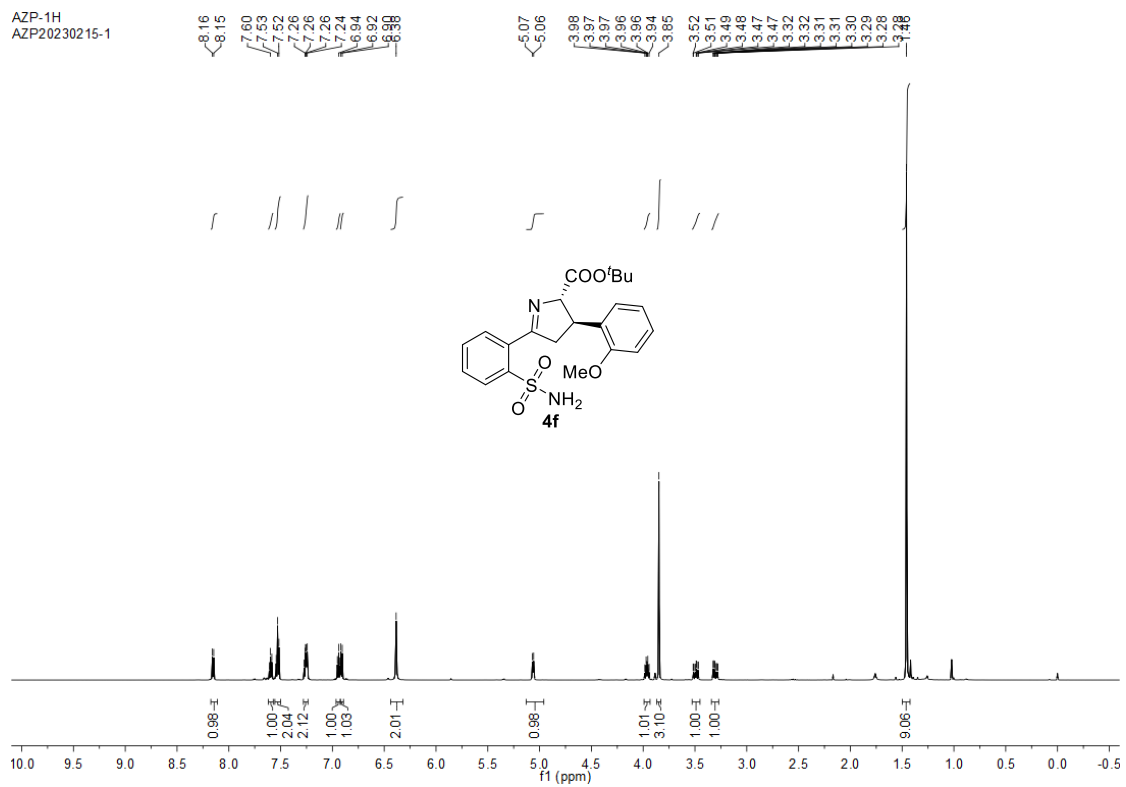

AZP-13C  
AZP20230215-1

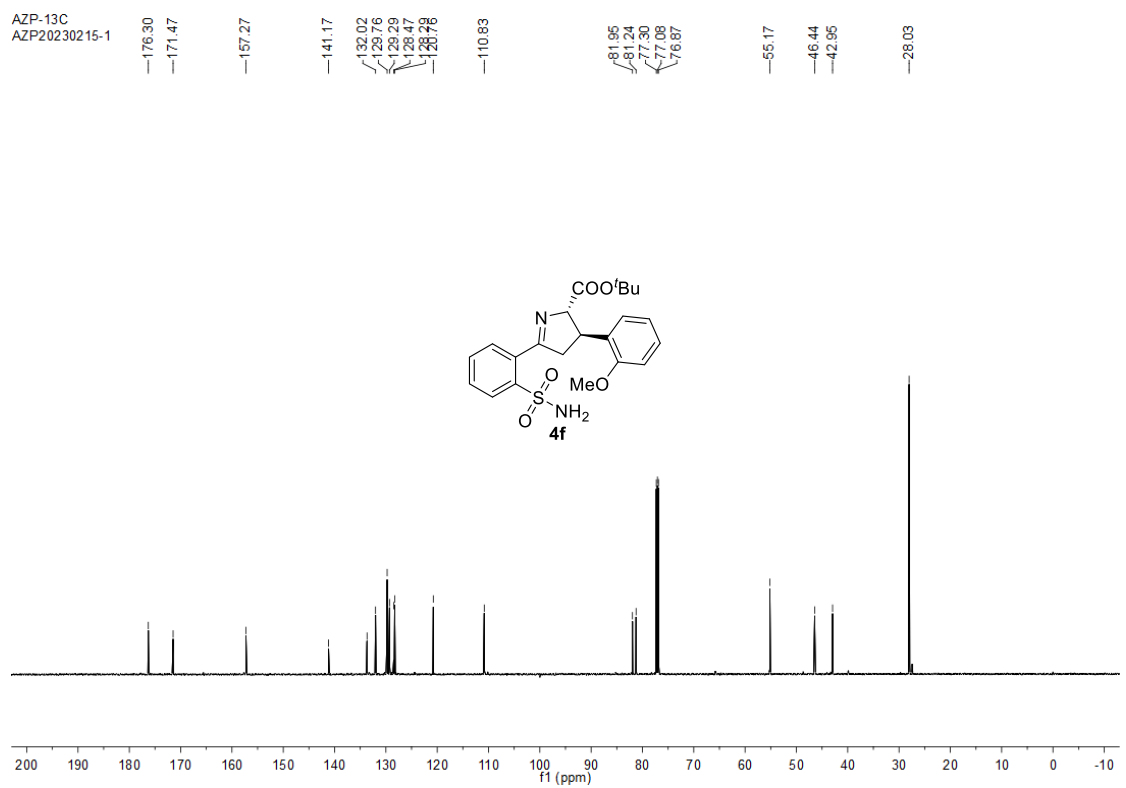

AZP-1H  
AZP20230219-1

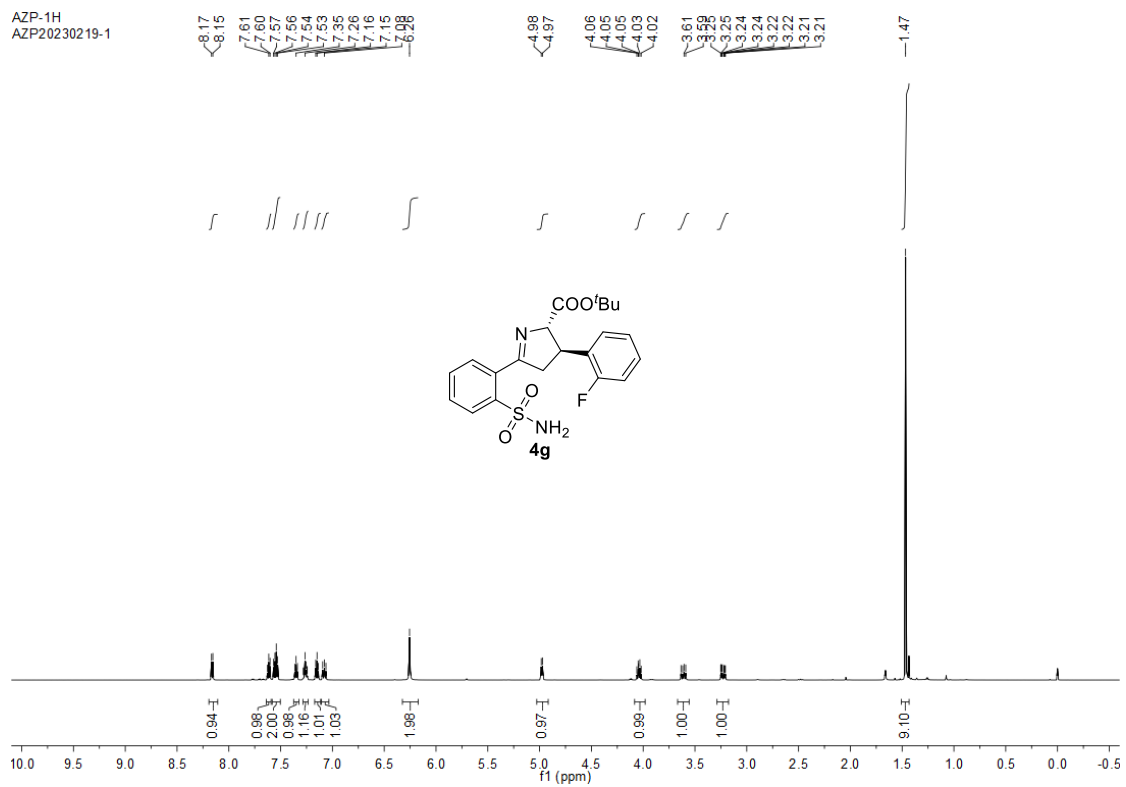

AZP-13C  
AZP20230219-1

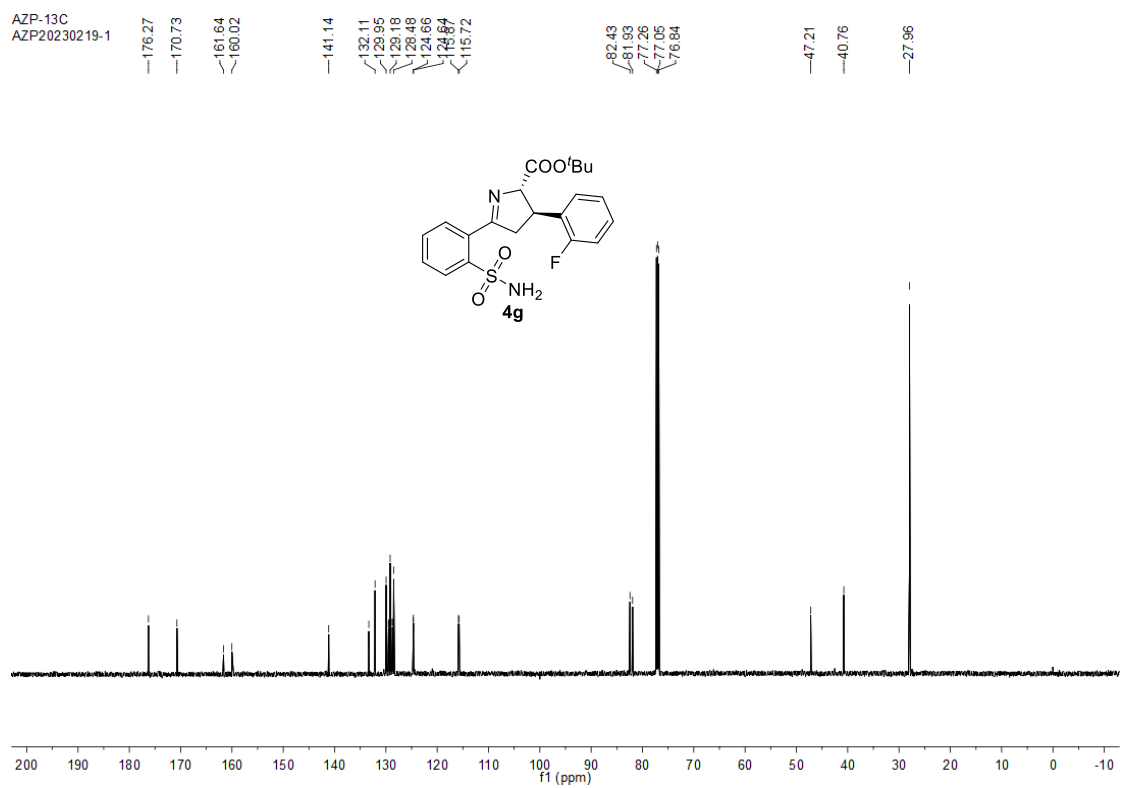

AZP-1H  
AZP20230104-1

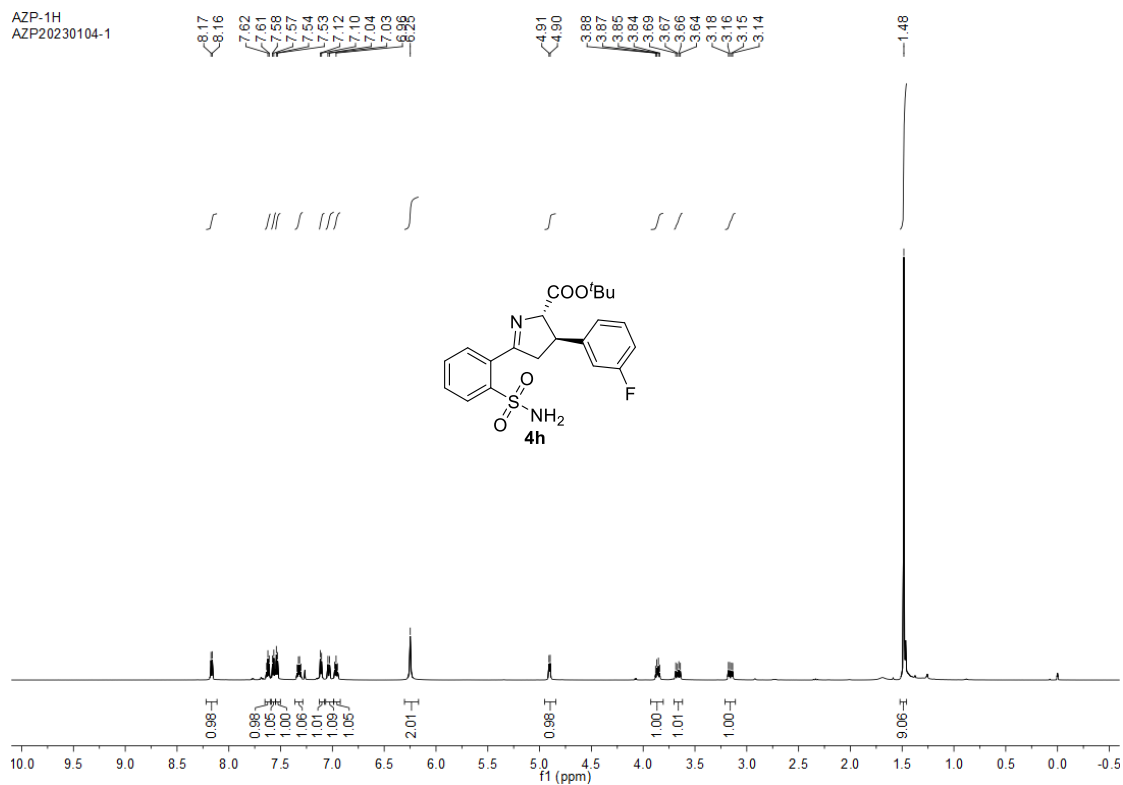

AZP-13C  
AZP20230104-1

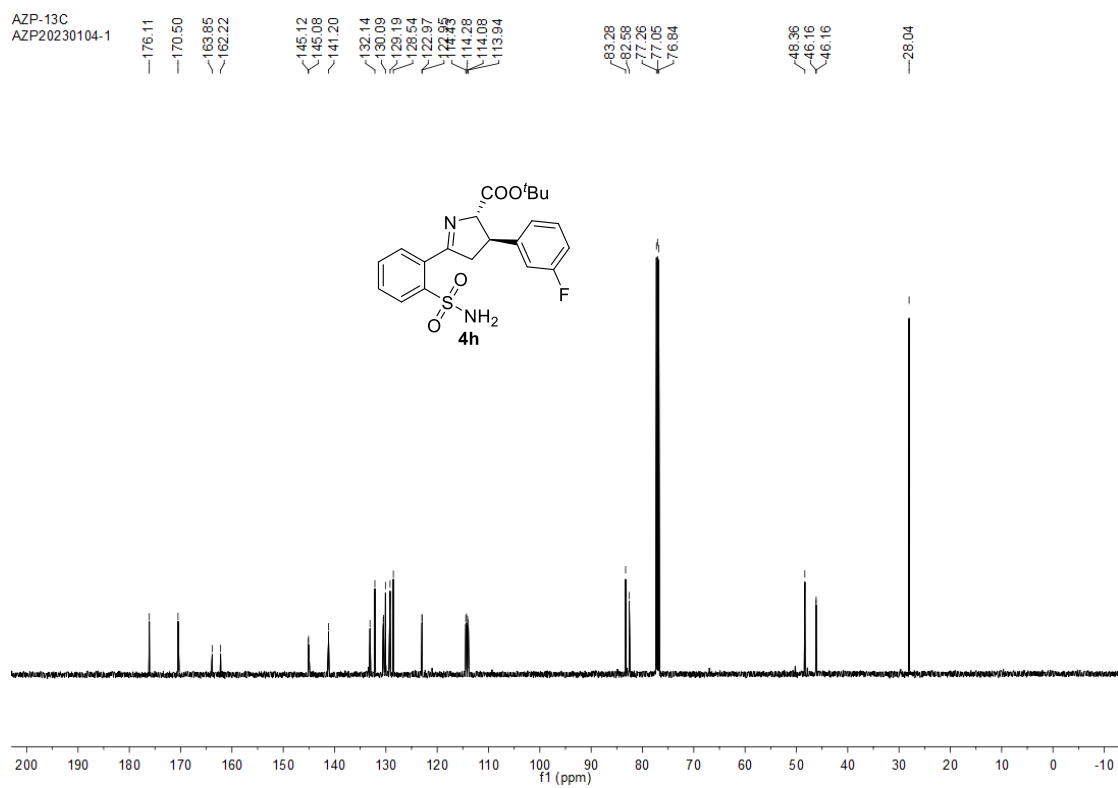

AZP-1H  
AZP20230105-1

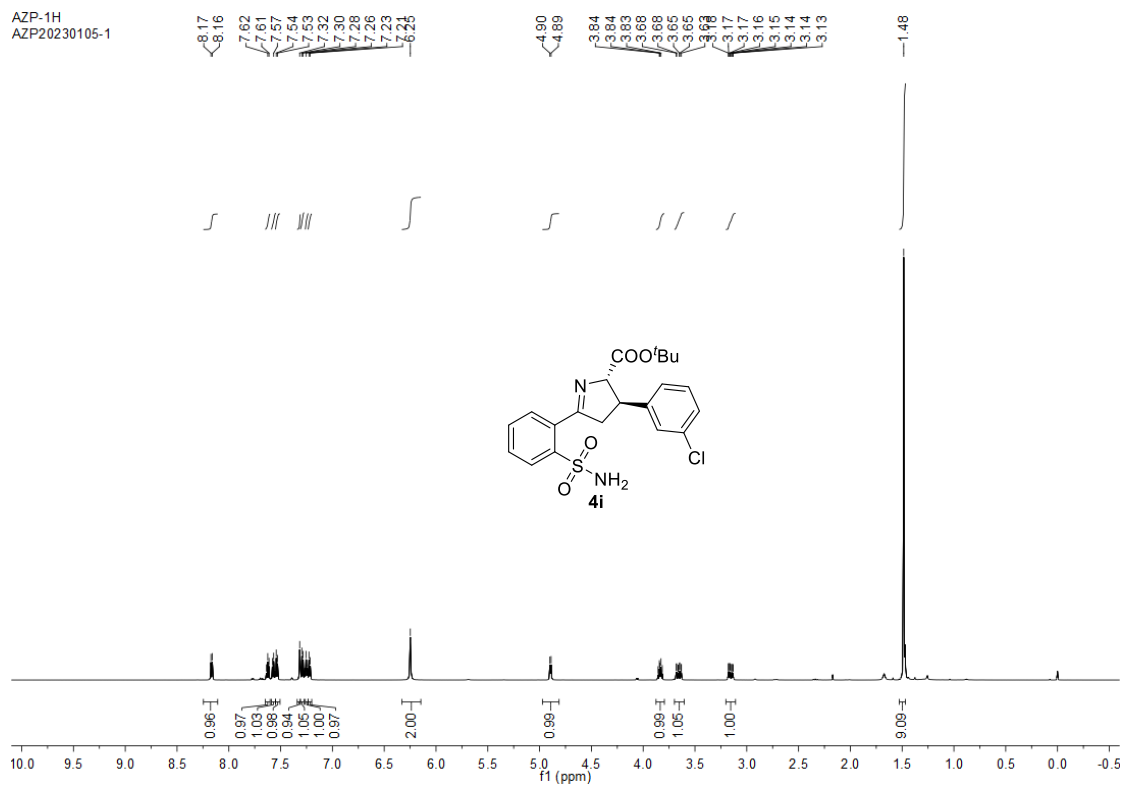

AZP-13C  
AZP20230105-1

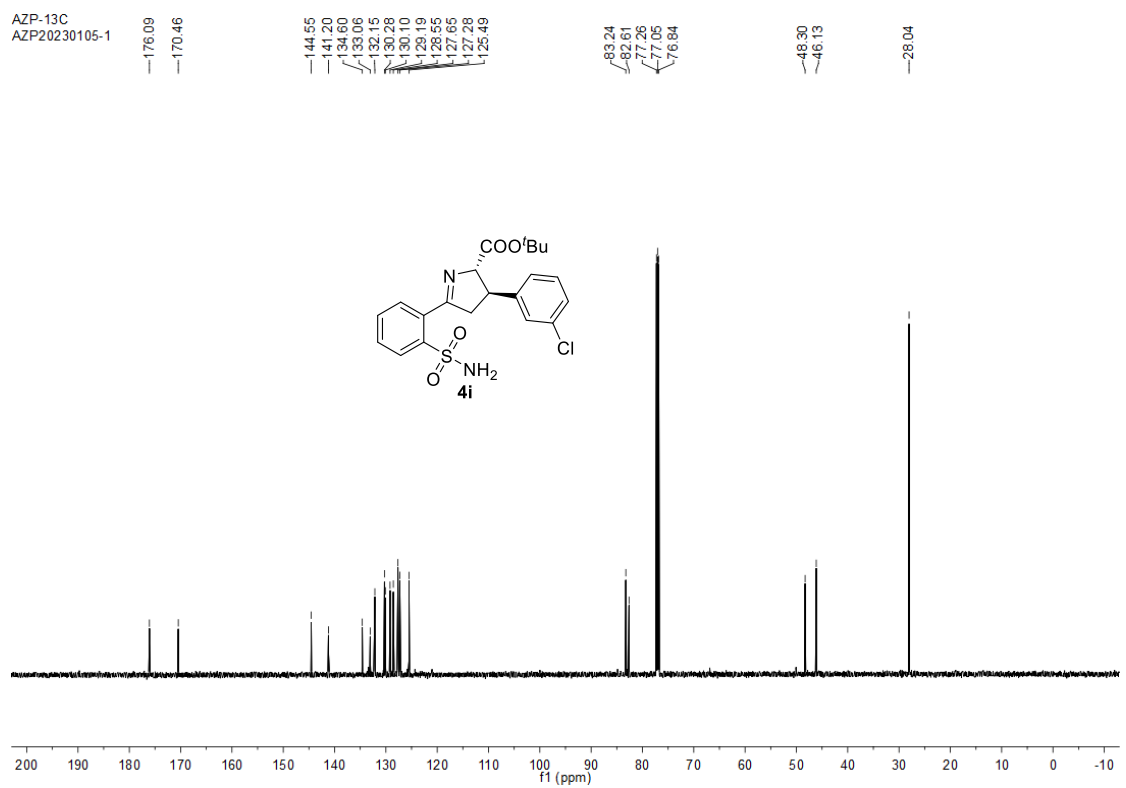



AZP-1H  
AZP20230106-1

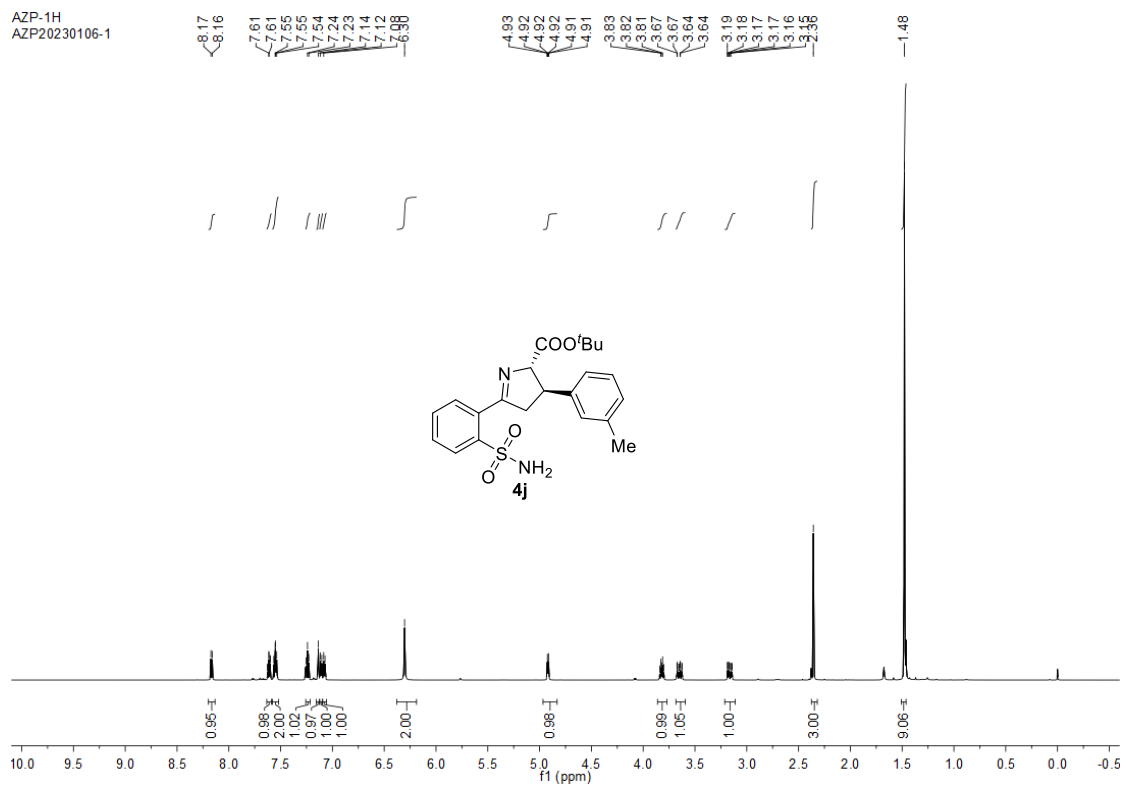

AZP-13C  
AZP20230106-1

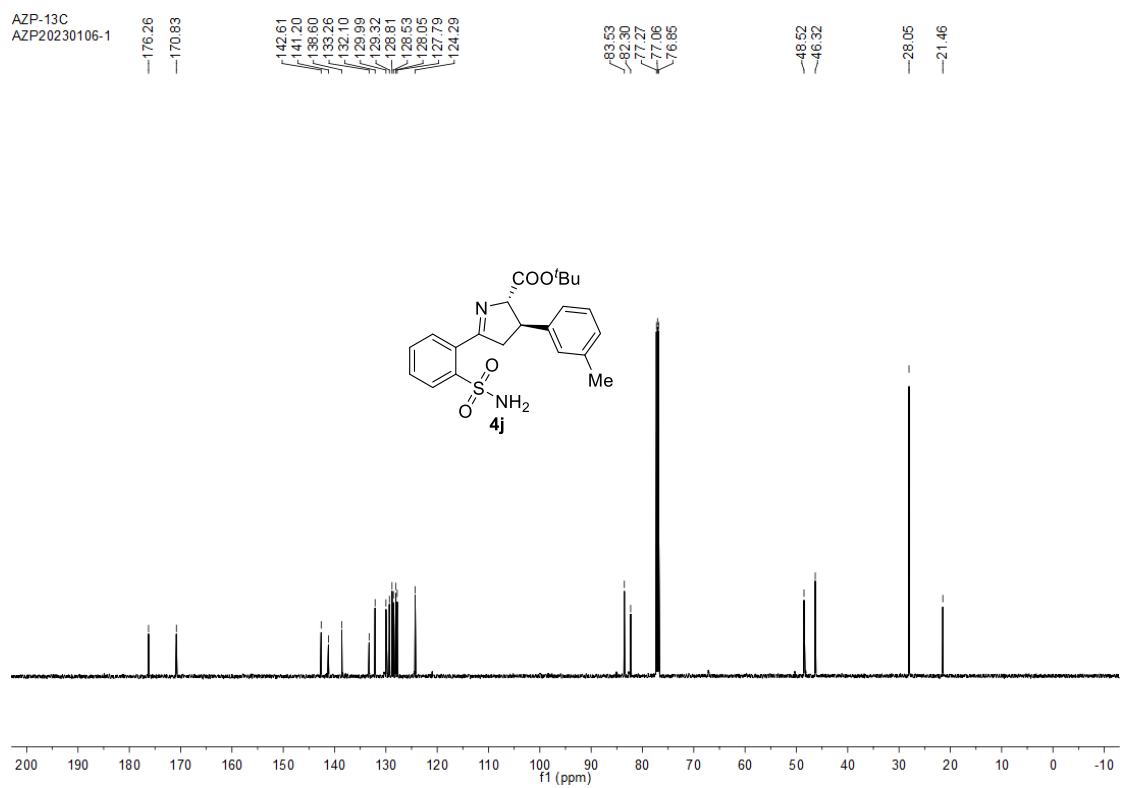

AZP-1H  
AZP20230107-1

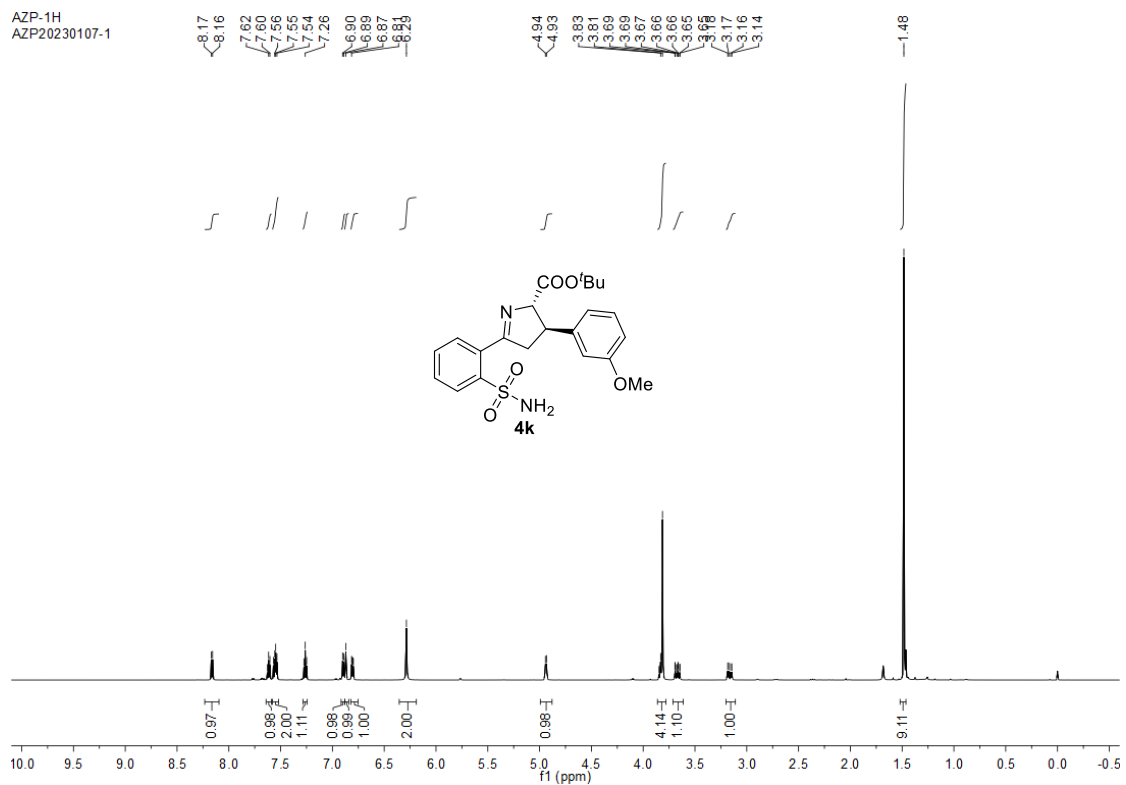

AZP-13C  
AZP20230107-1

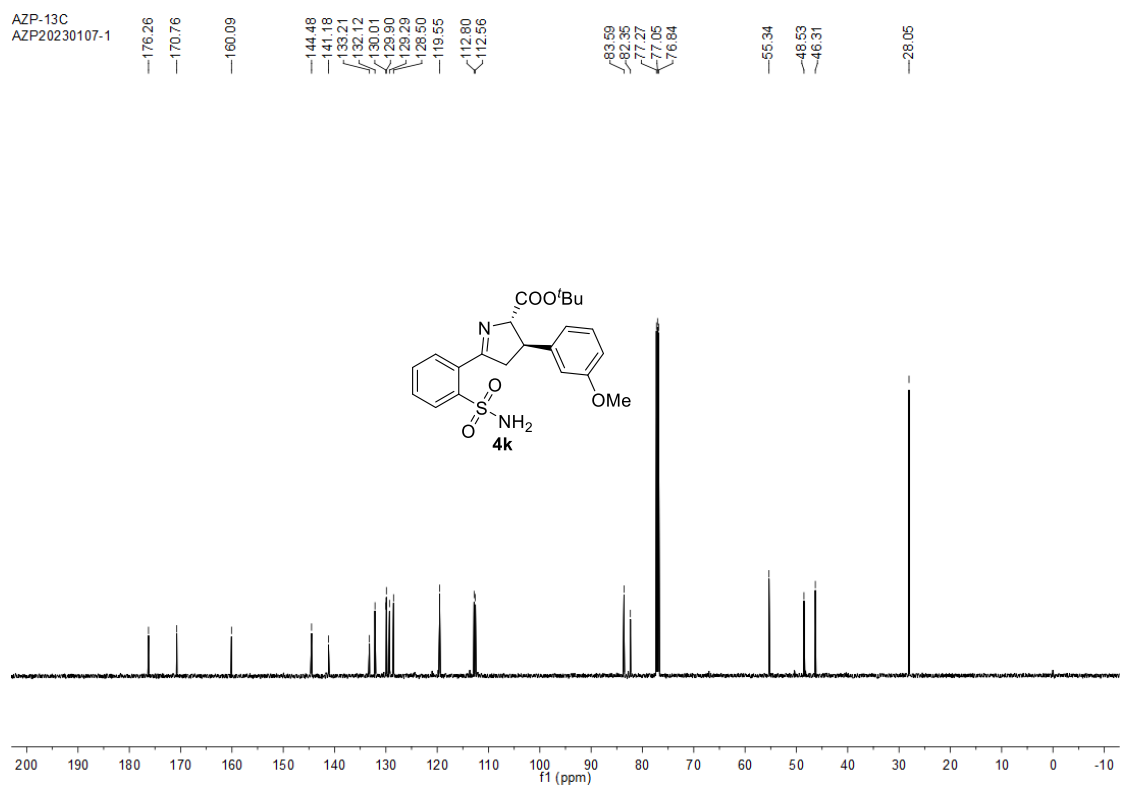

AZP-1H  
AZP20221205-1

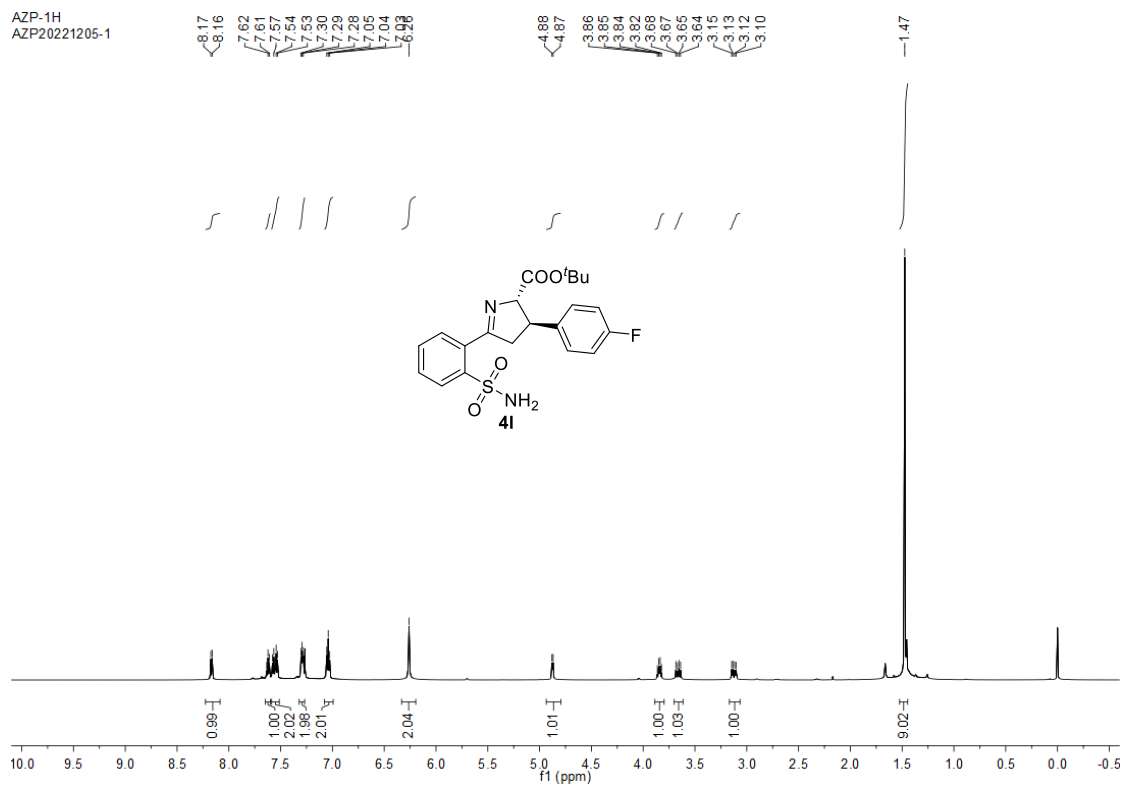

AZP-13C  
AZP20221205-1

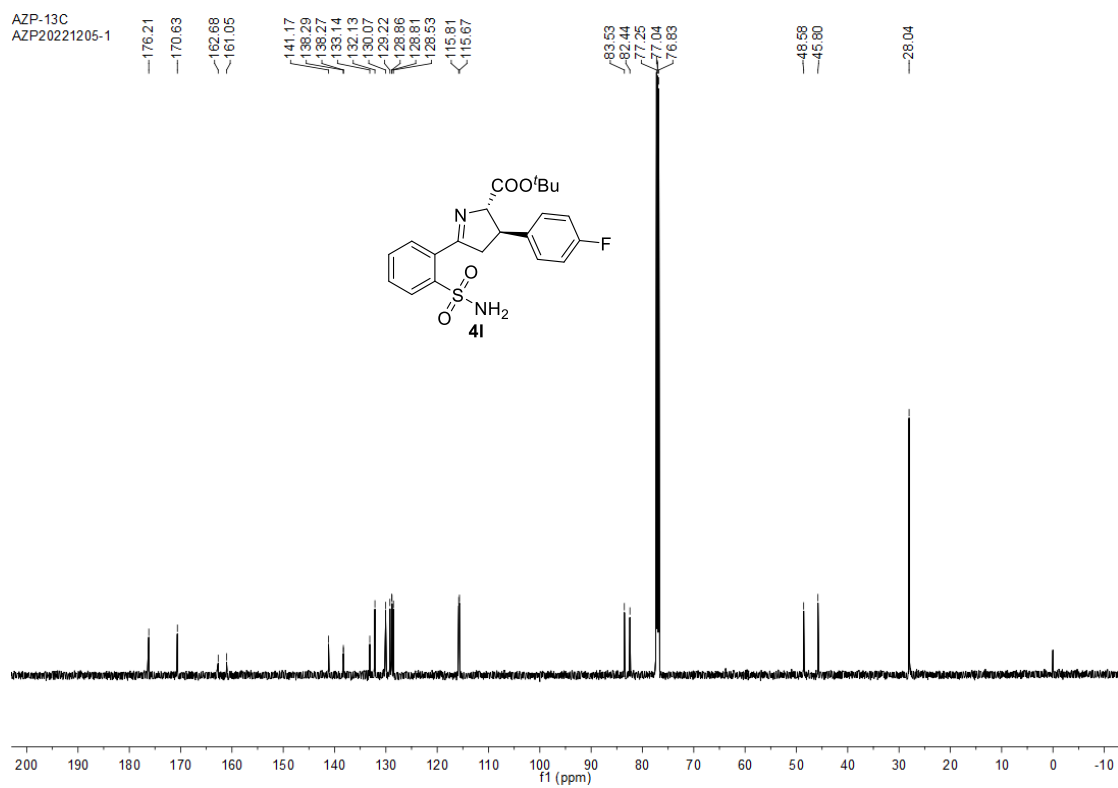

AZP-1H  
AZP20221205-2

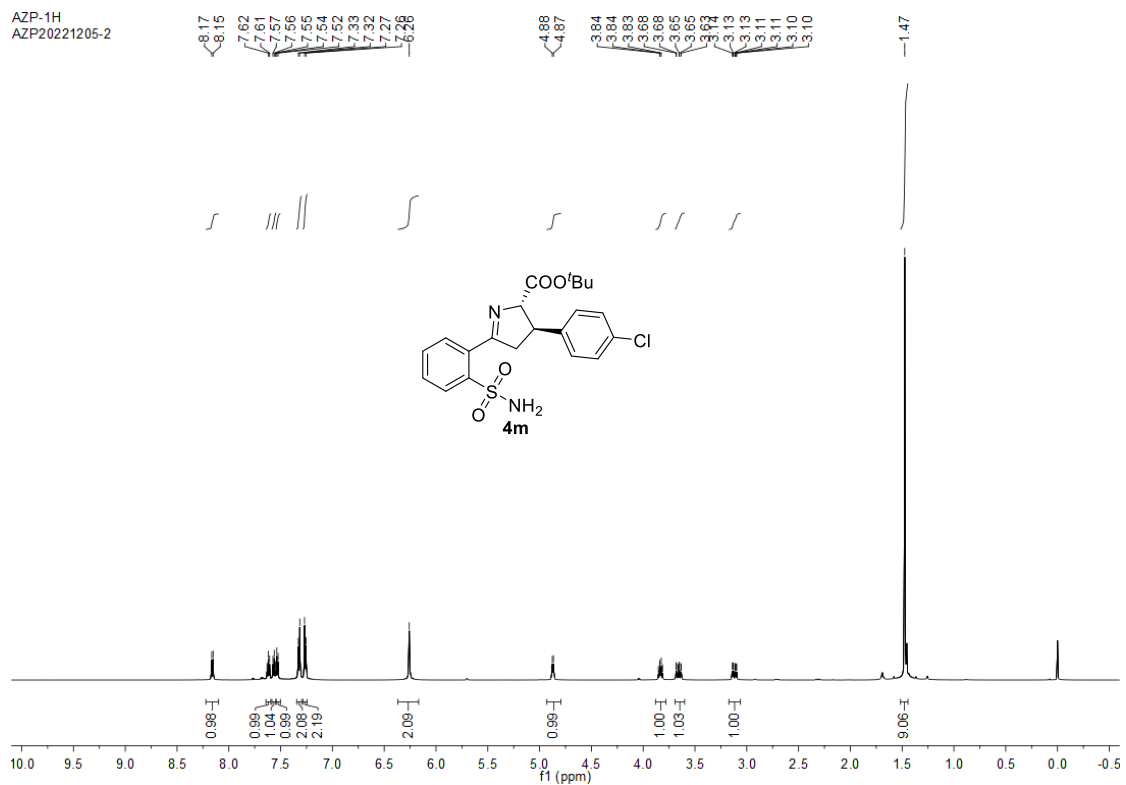

AZP-13C  
AZP20221205-2

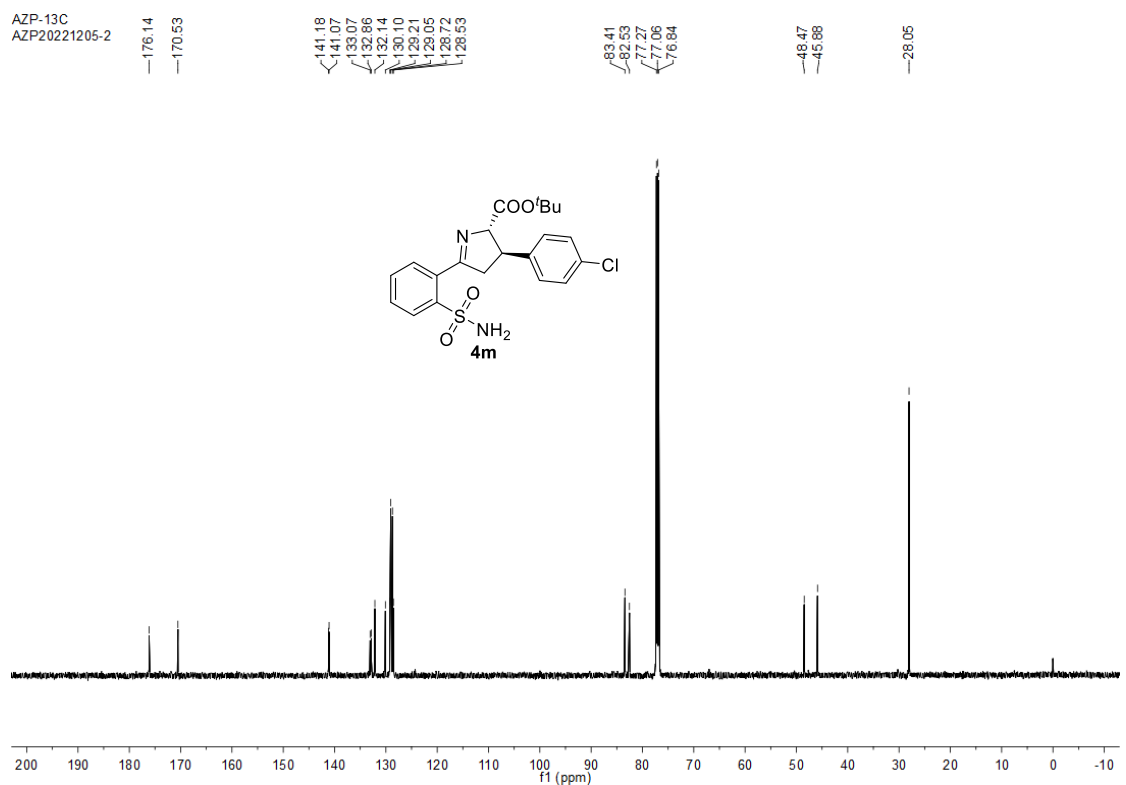

AZP-1H  
AZP20221207-1

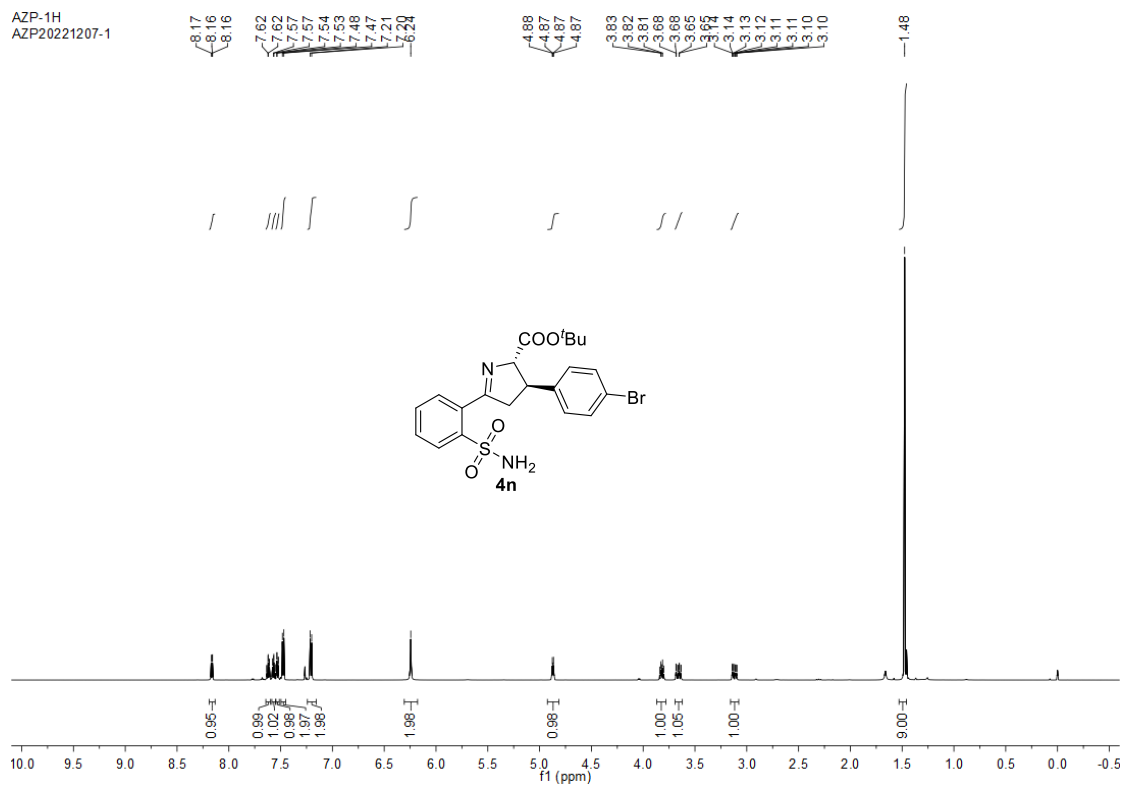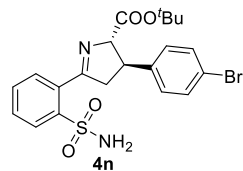

AZP-13C  
AZP20221207-1

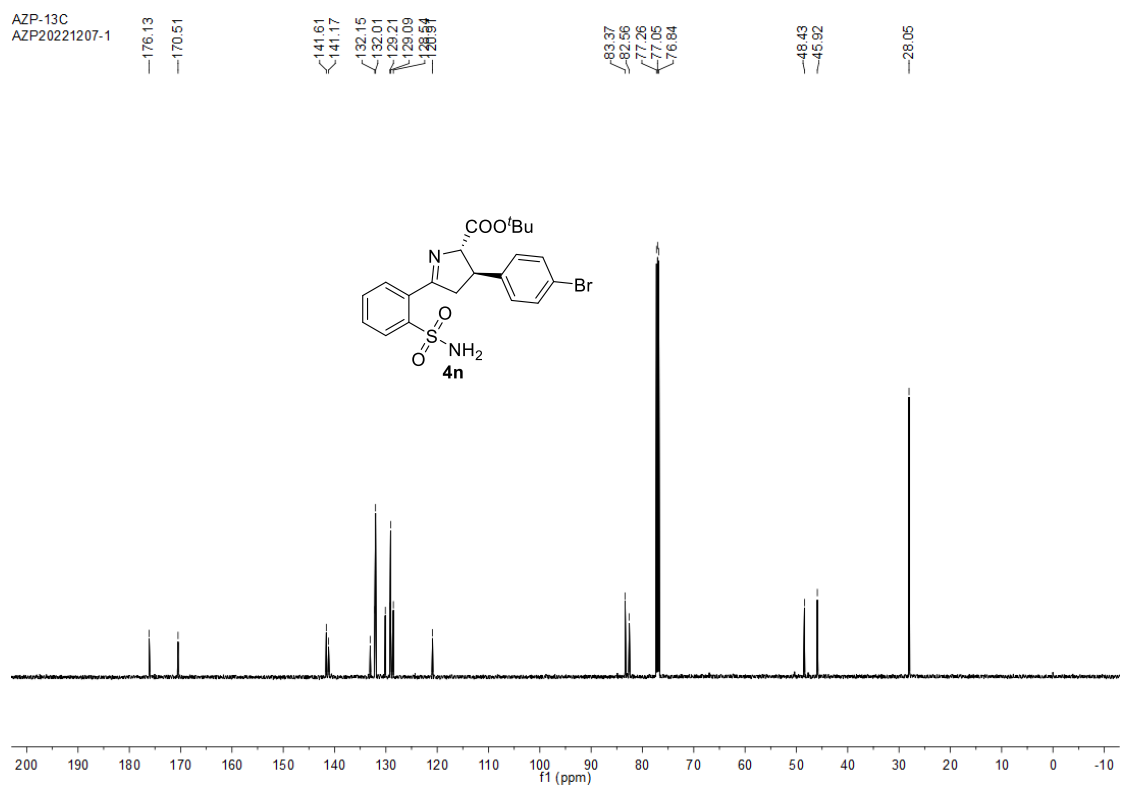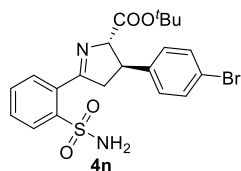

AZP-1H  
AZP20221208-1

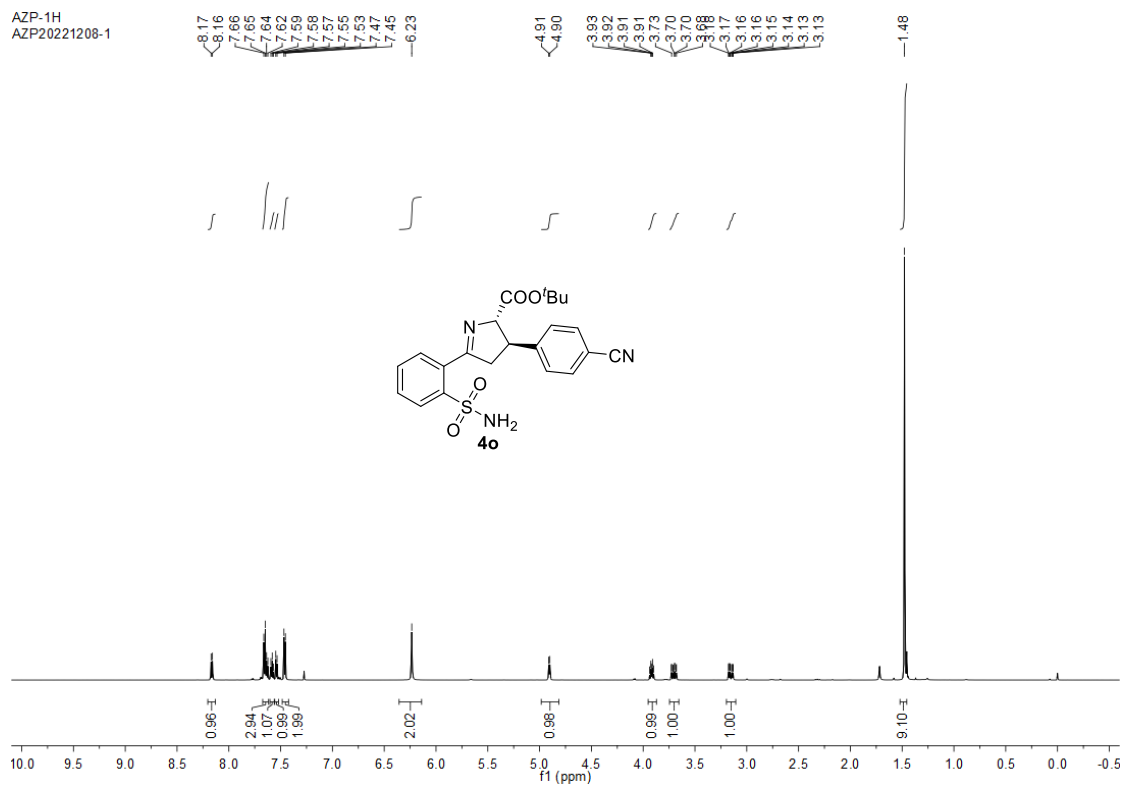

AZP-13C  
AZP20221208-1

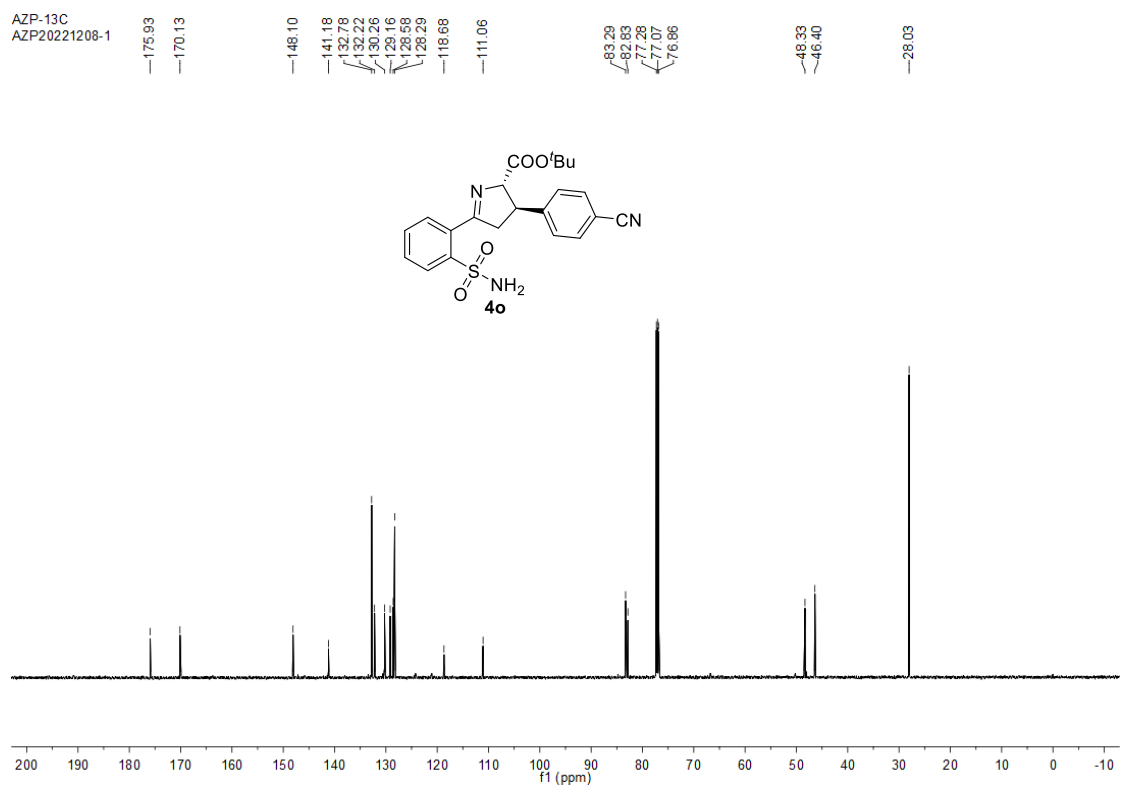

AZP-1H  
AZP20230212-1

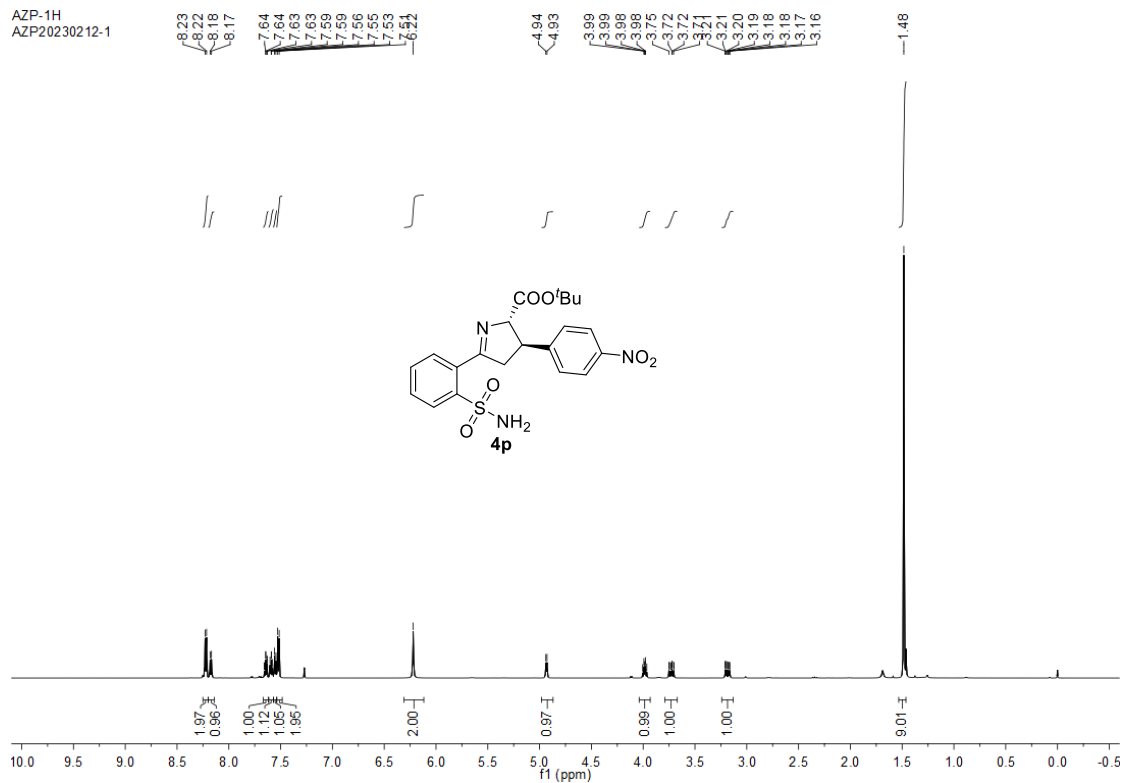

AZP-13C  
AZP20221212-1

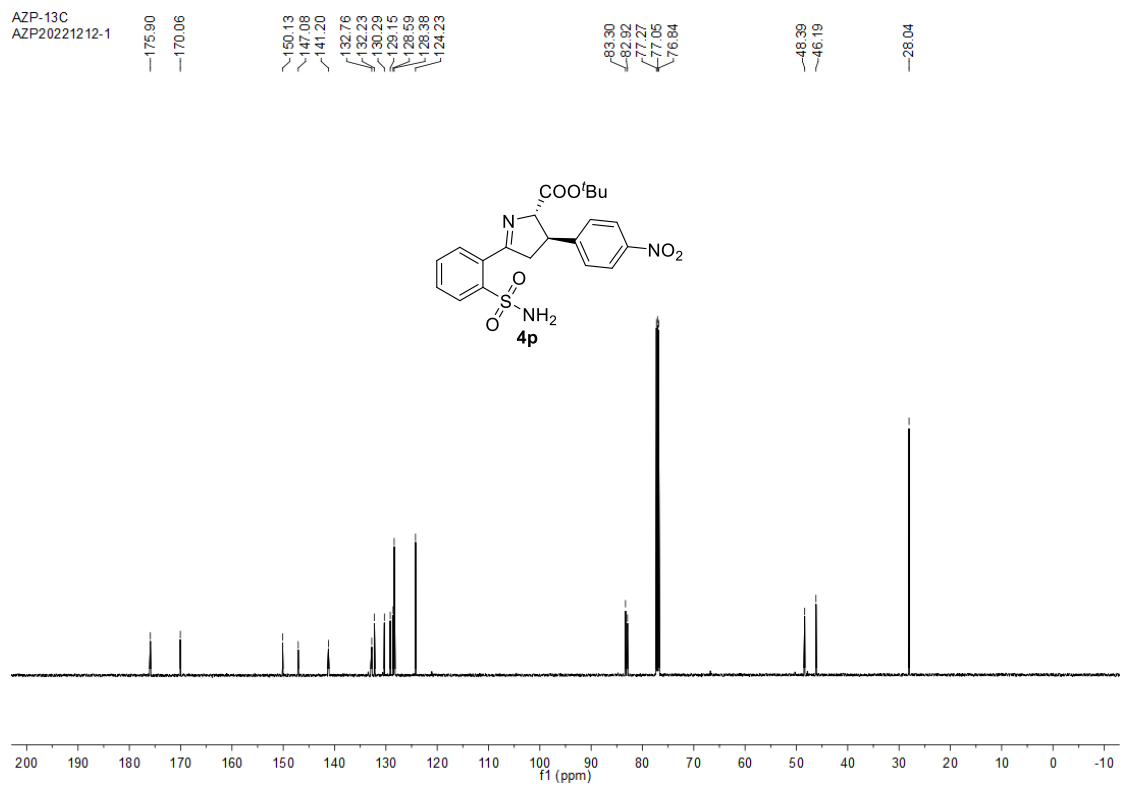

AZP-1H  
AZP20221207-2

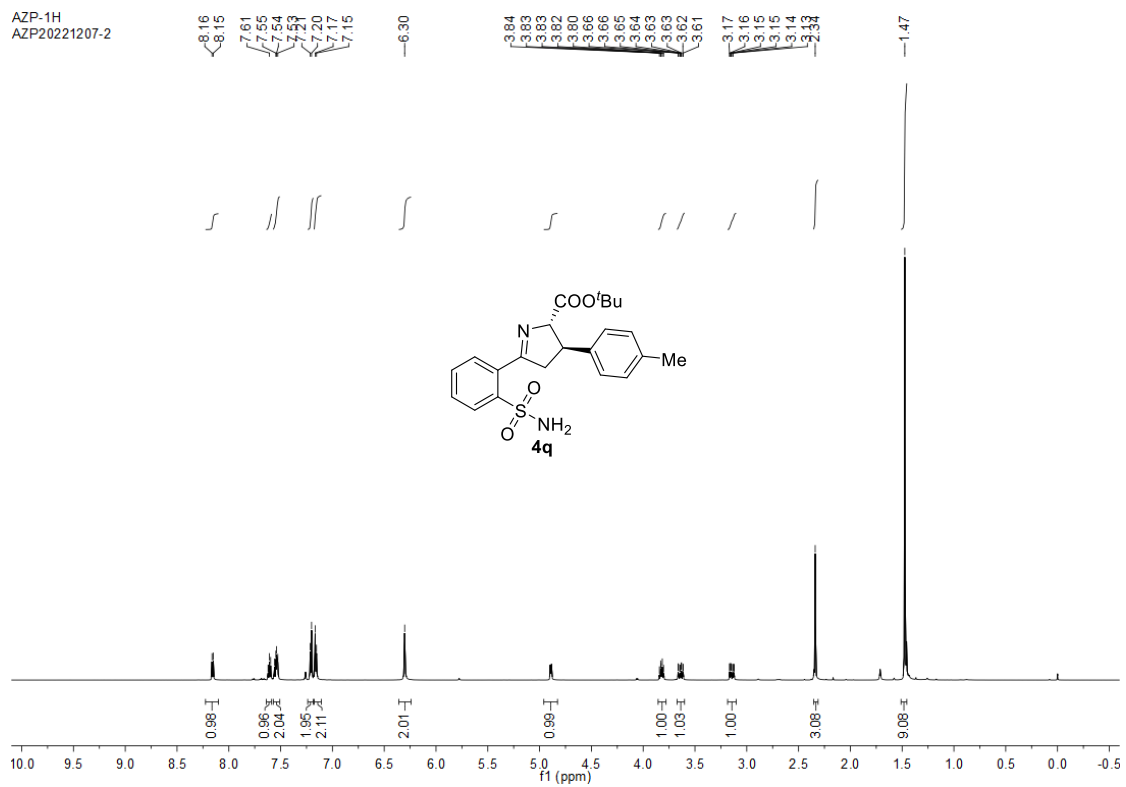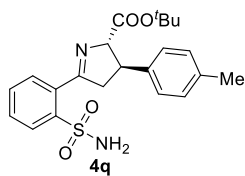

AZP-13C  
AZP20221207-2

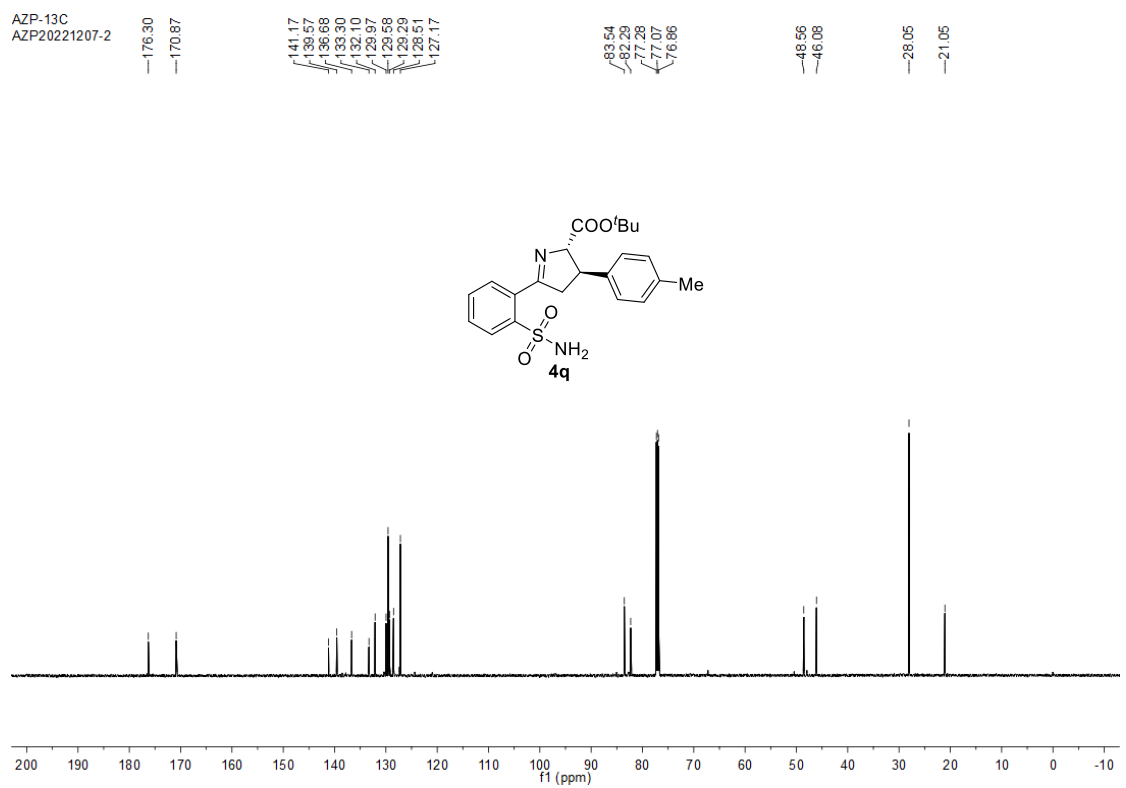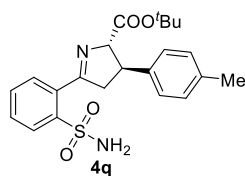



AZP-1H  
AZP20221213-1

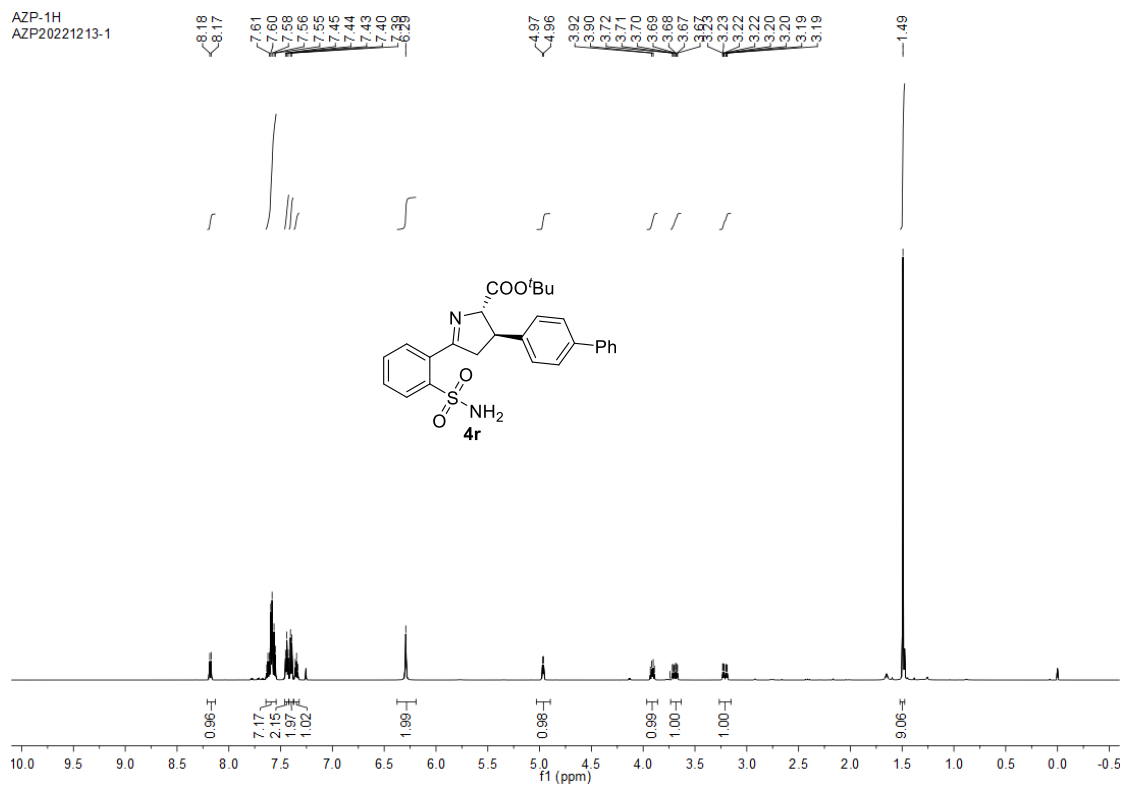

AZP-13C  
AZP20221213-1

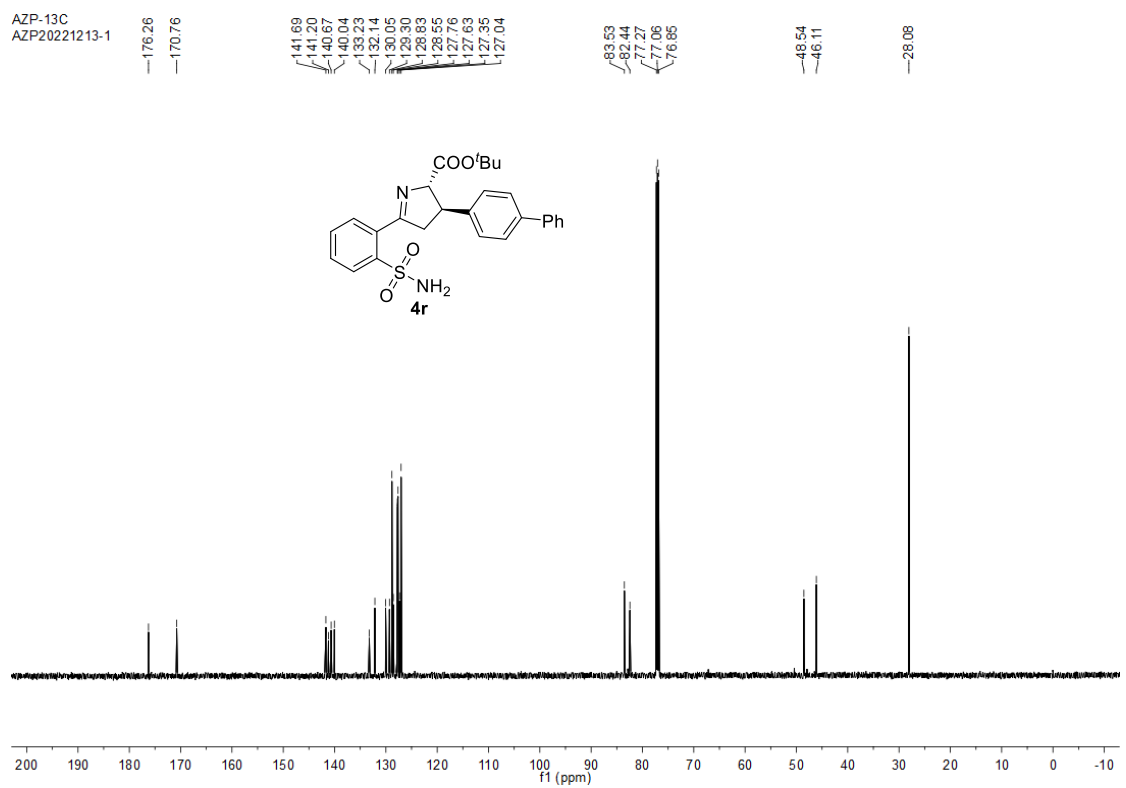

AZP-1H  
AZP20221229-1

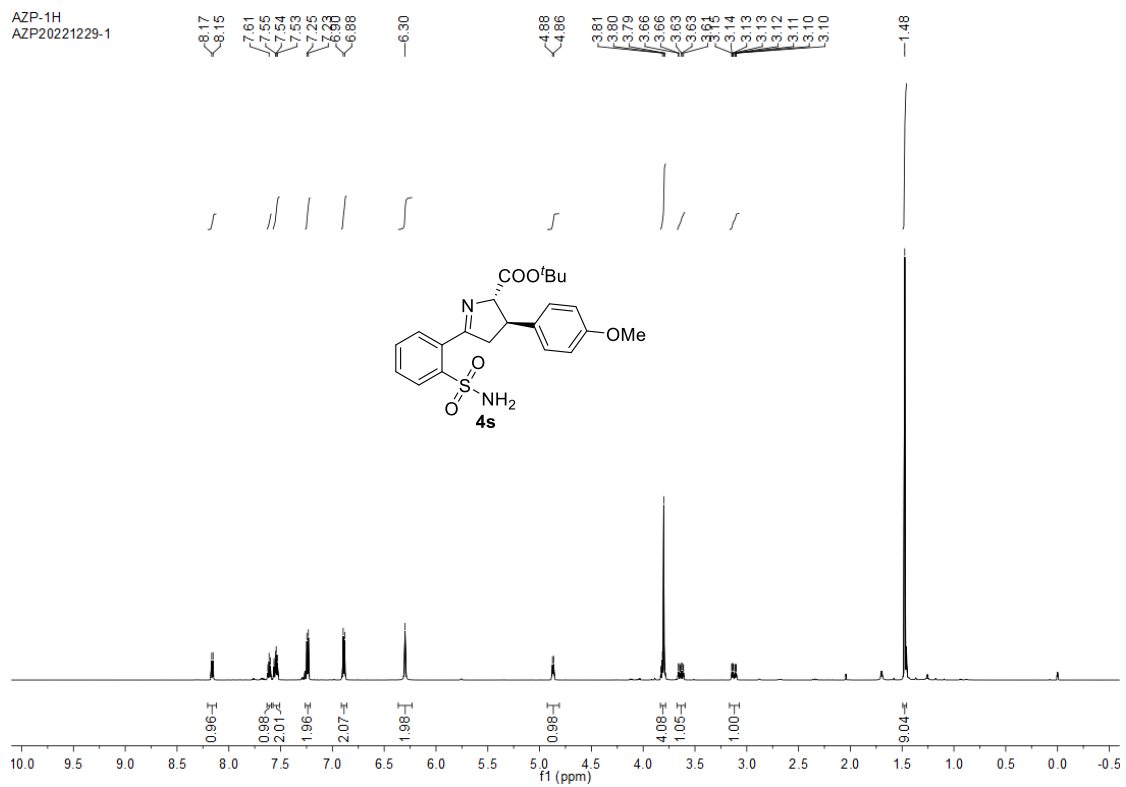

AZP-13C  
AZP20221229-1

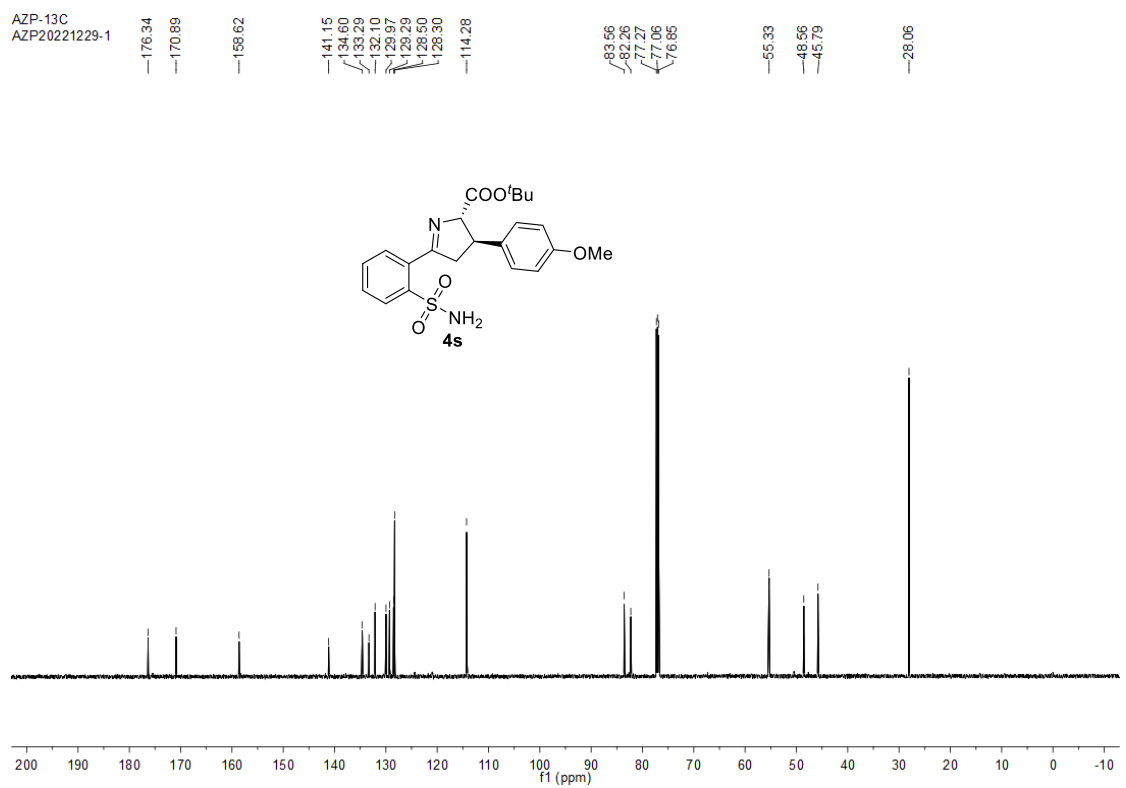

AZP-1H  
AZP20221230-1

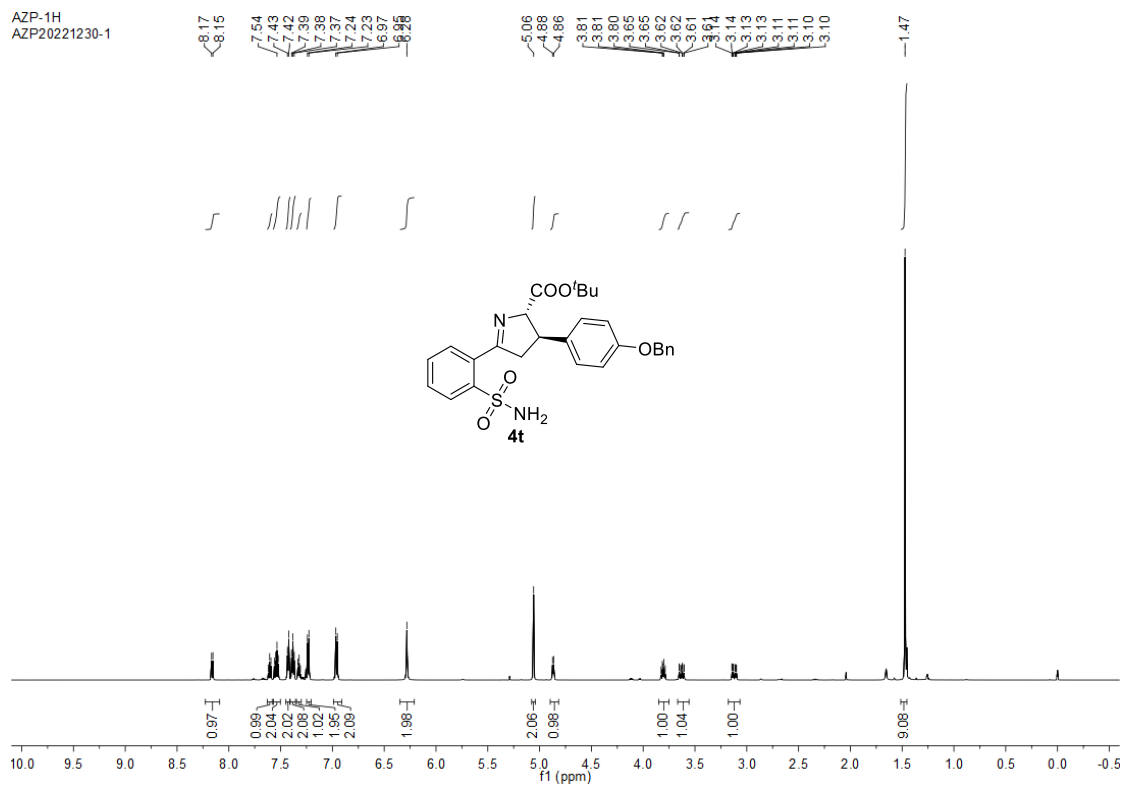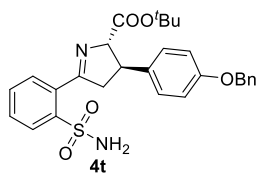

AZP-13C  
AZP20221230-1

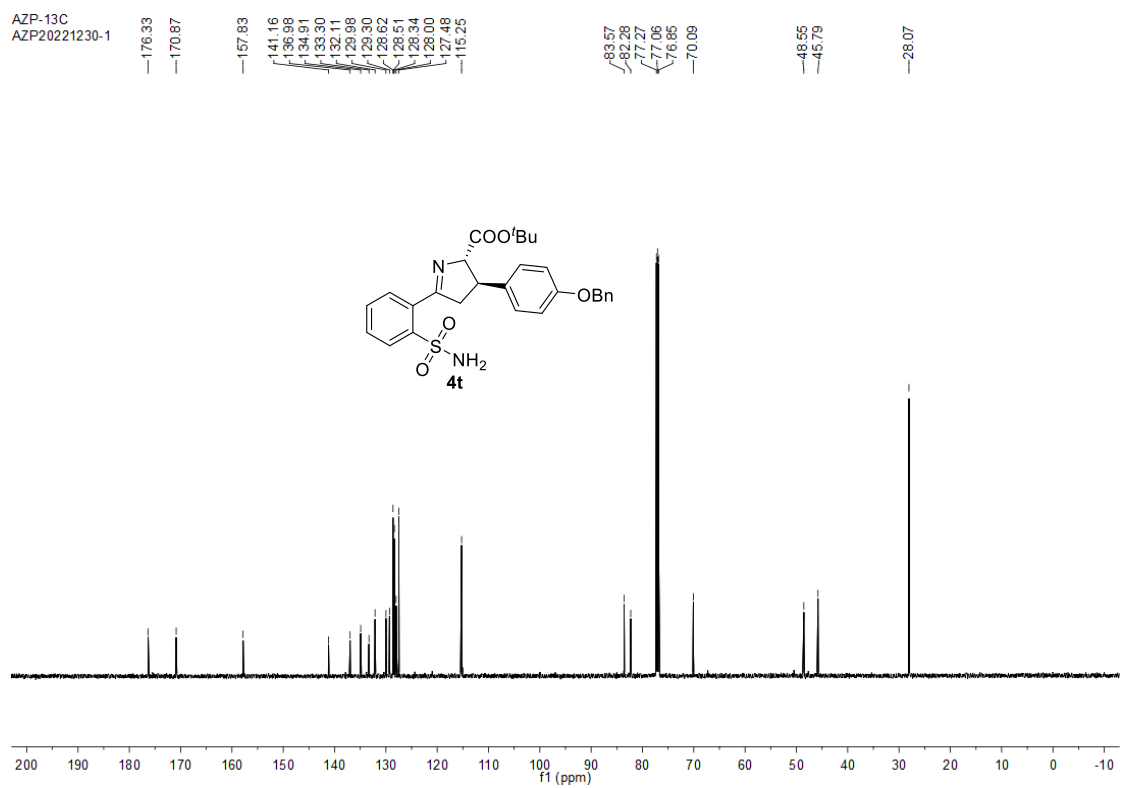

AZP-1H  
AZP20221231-1

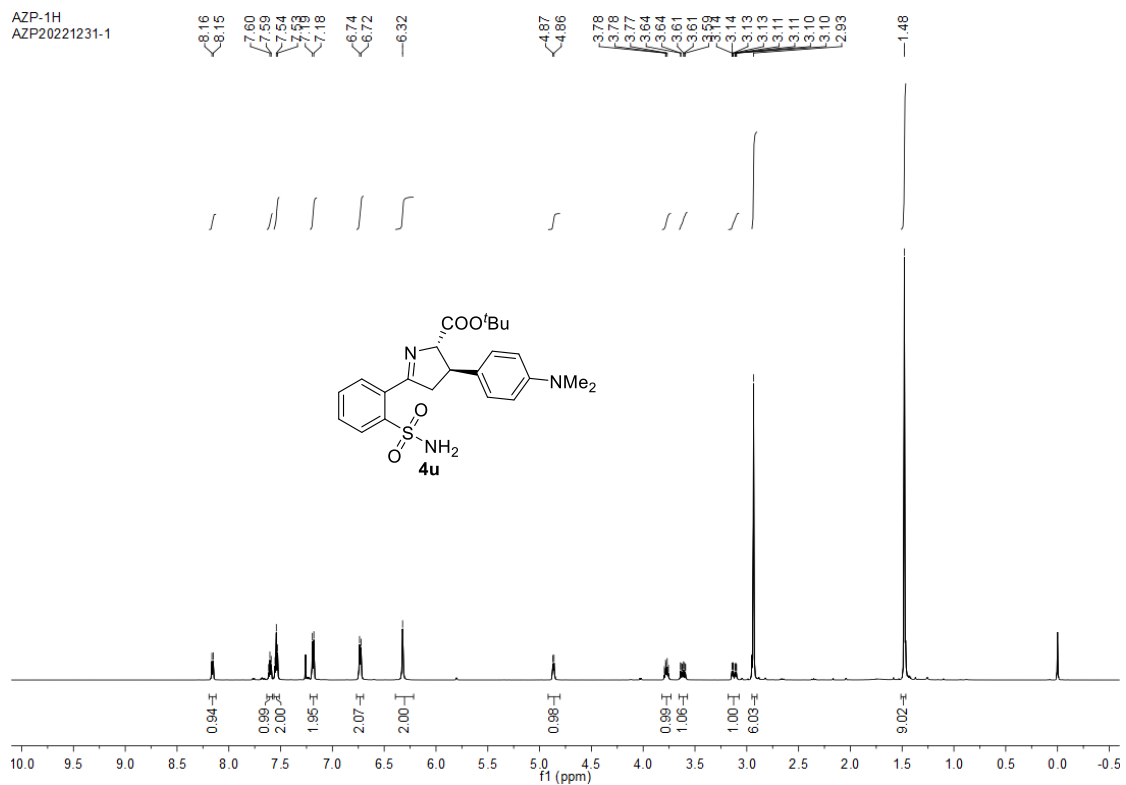

AZP-13C  
AZP20221231-1

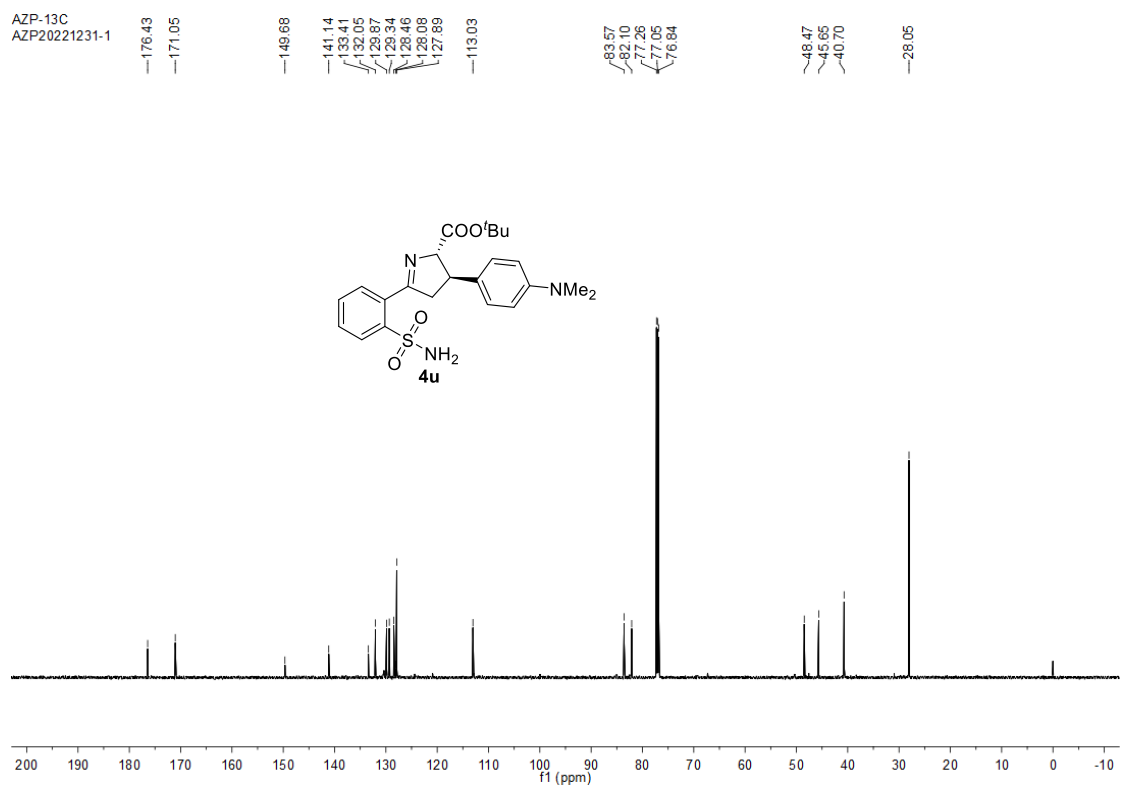

AZP-1H  
AZP20230225-1

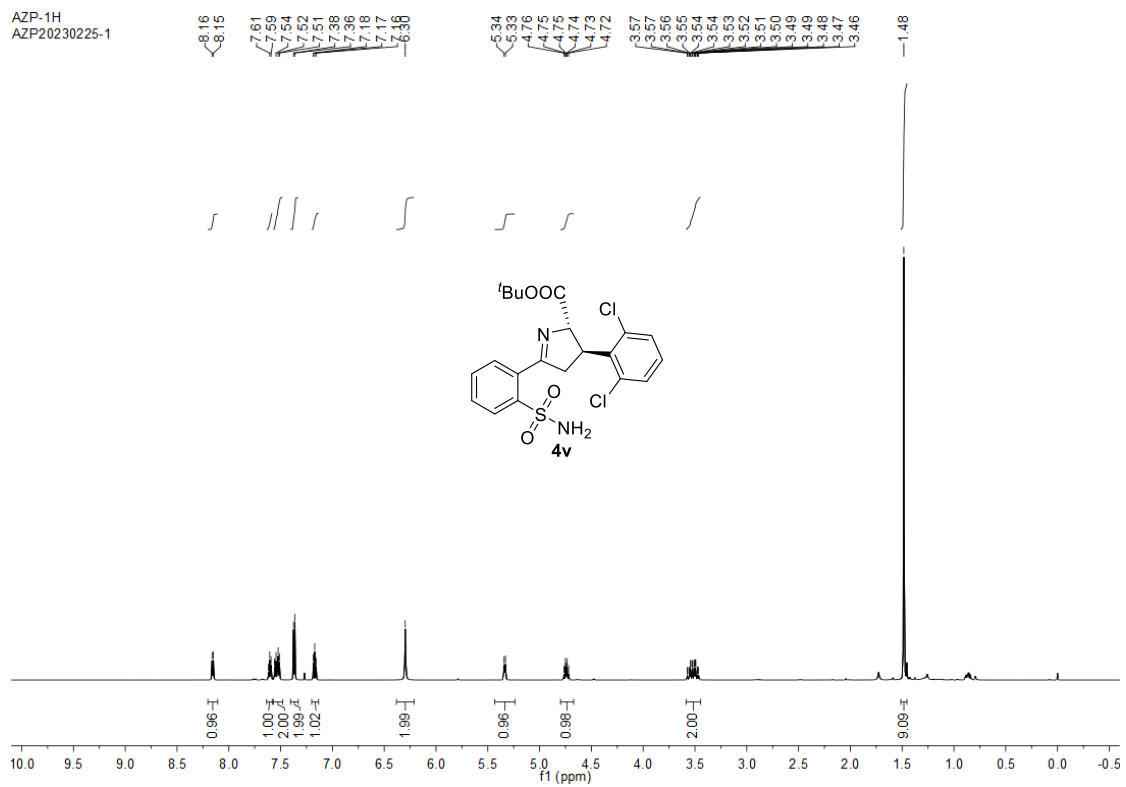

AZP-13C  
AZP20230225-1

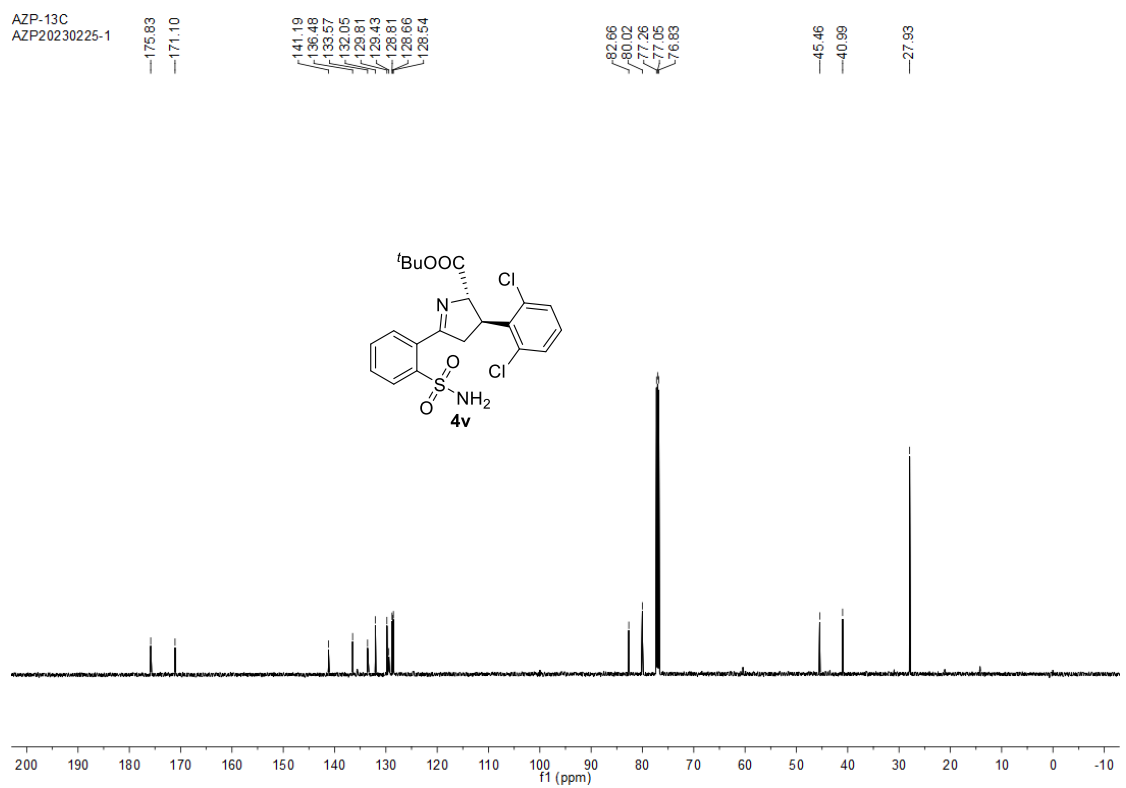

AZP-1H  
AZP20230102-1

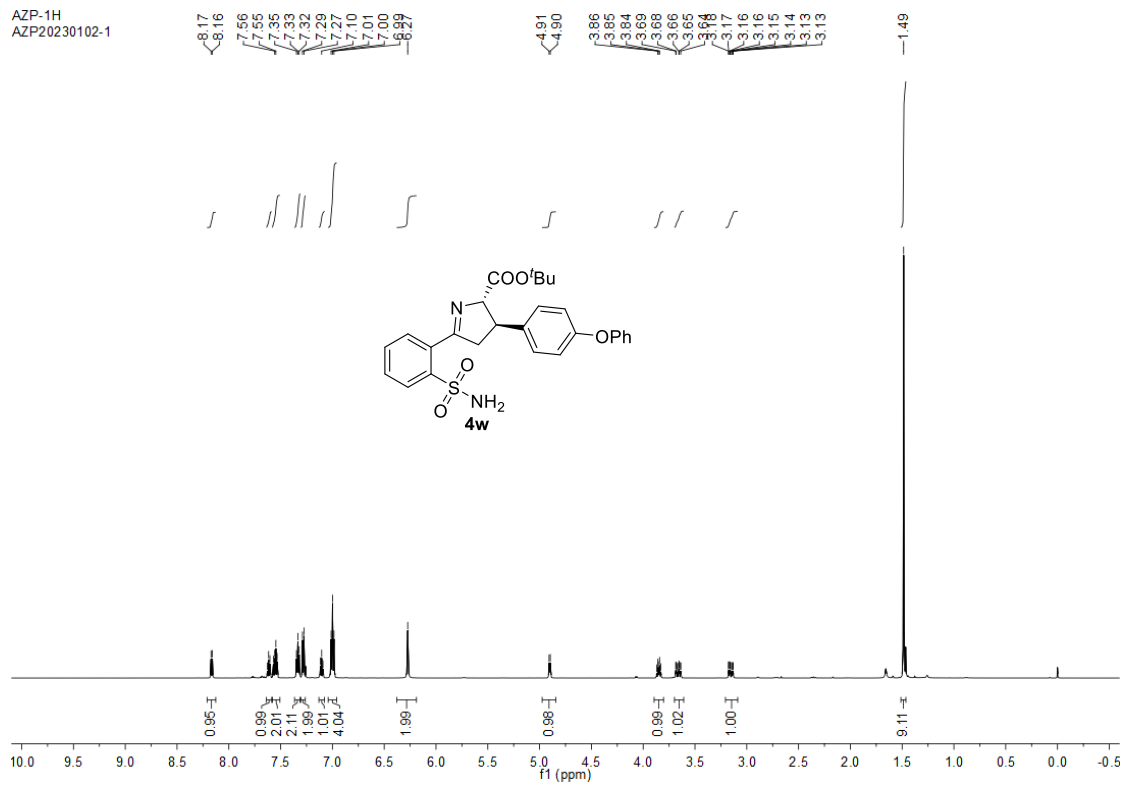

AZP-13C  
AZP20230102-1

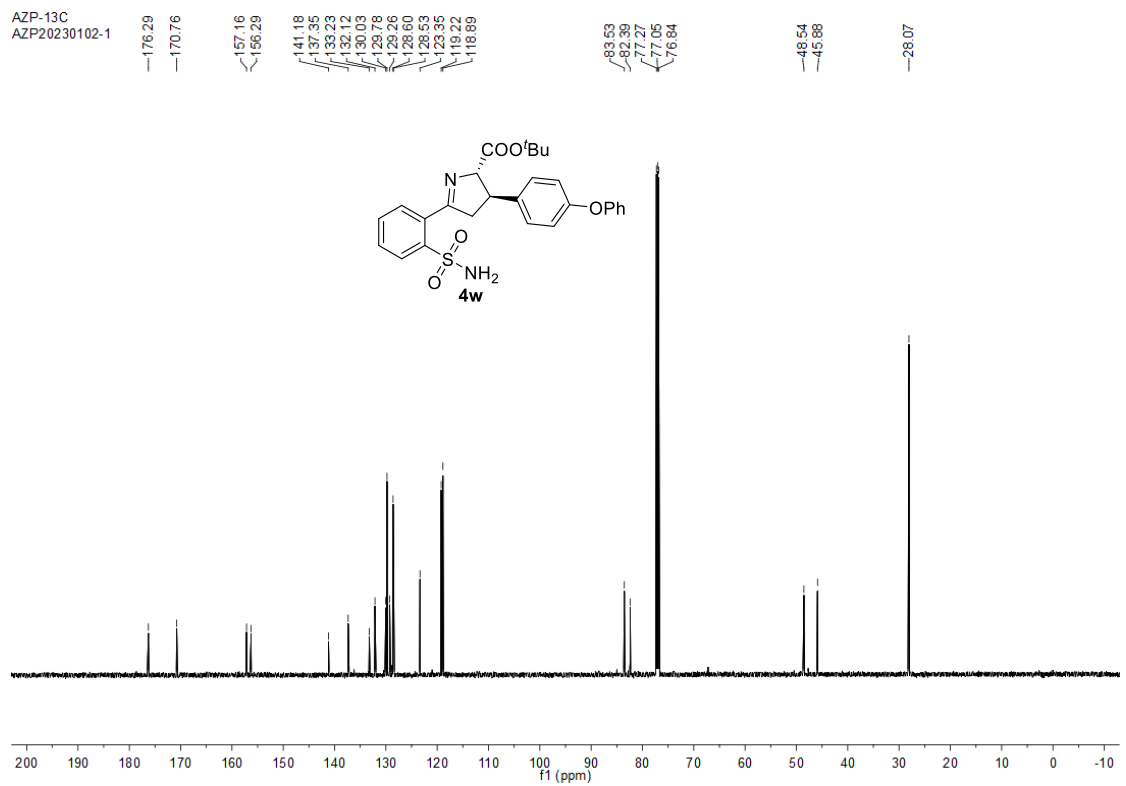

AZP-1H  
AZP20221214-1

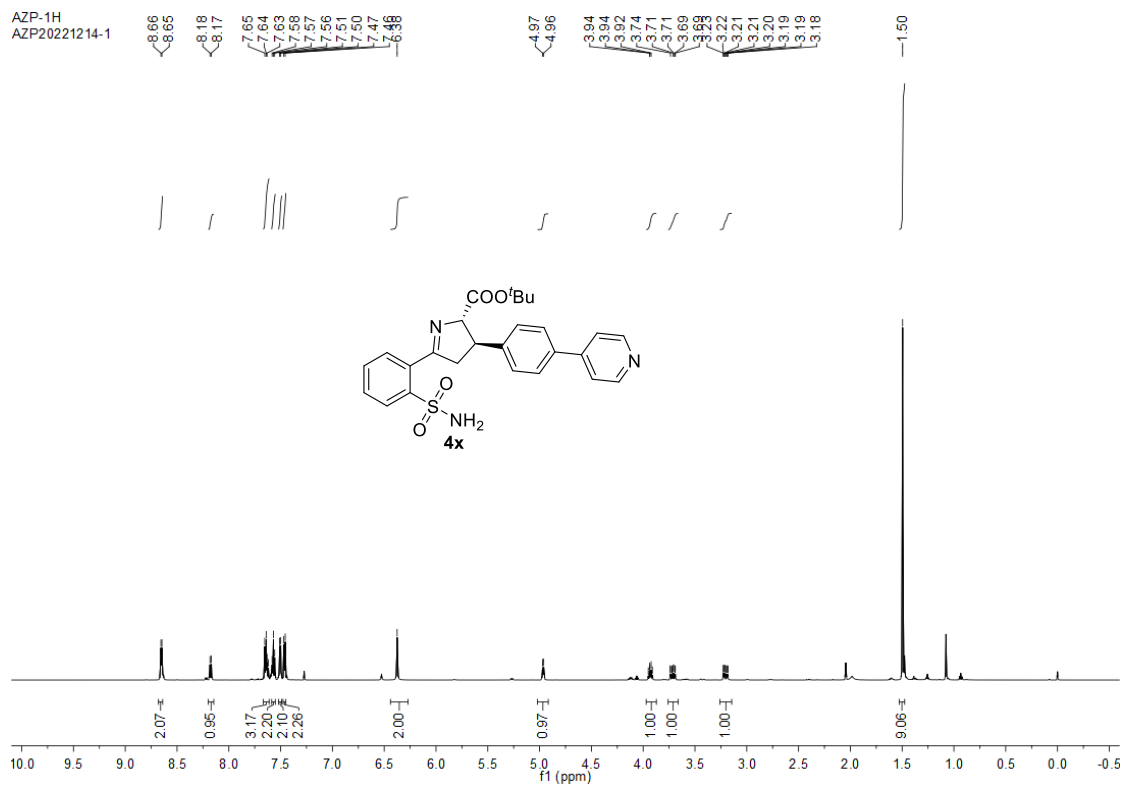

AZP-13C  
AZP20221214-1

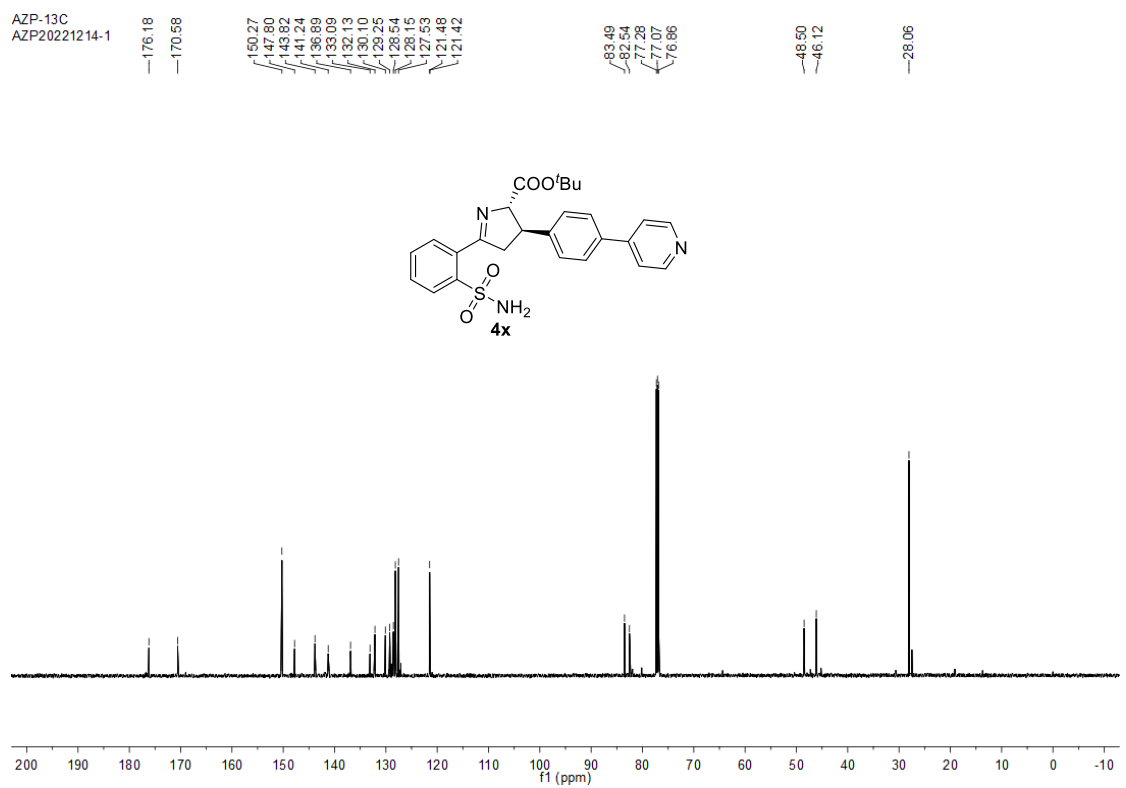

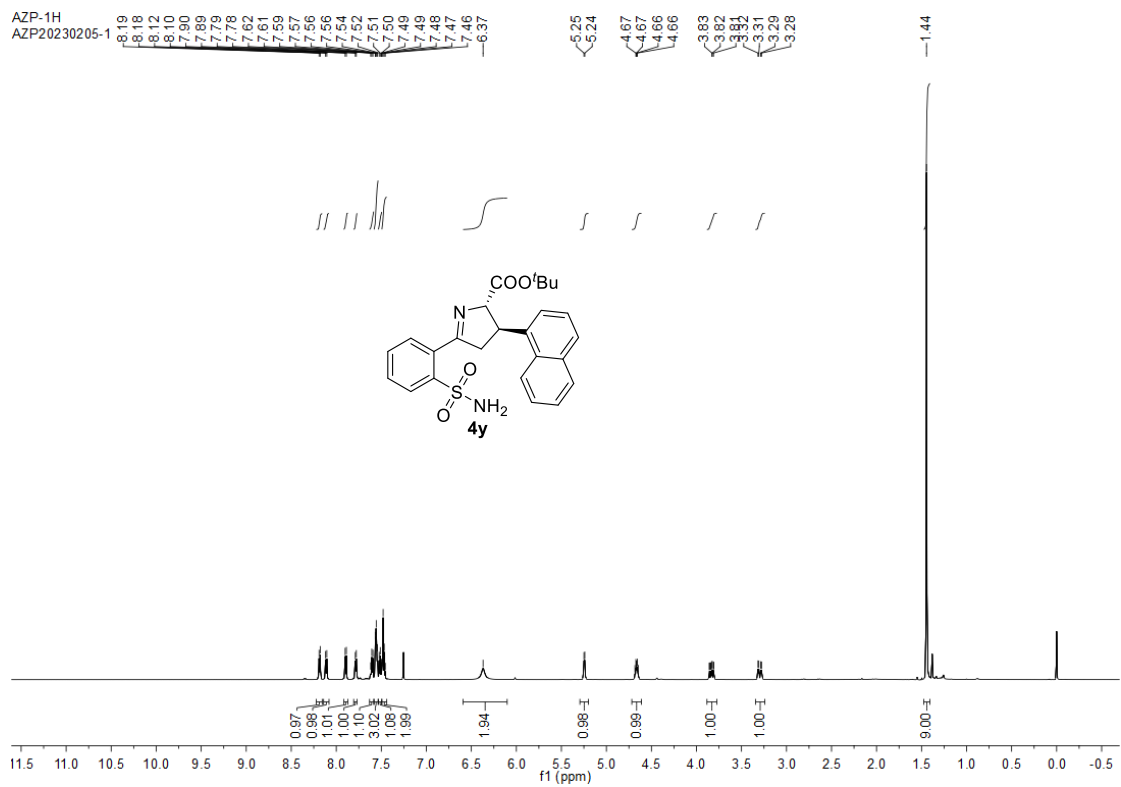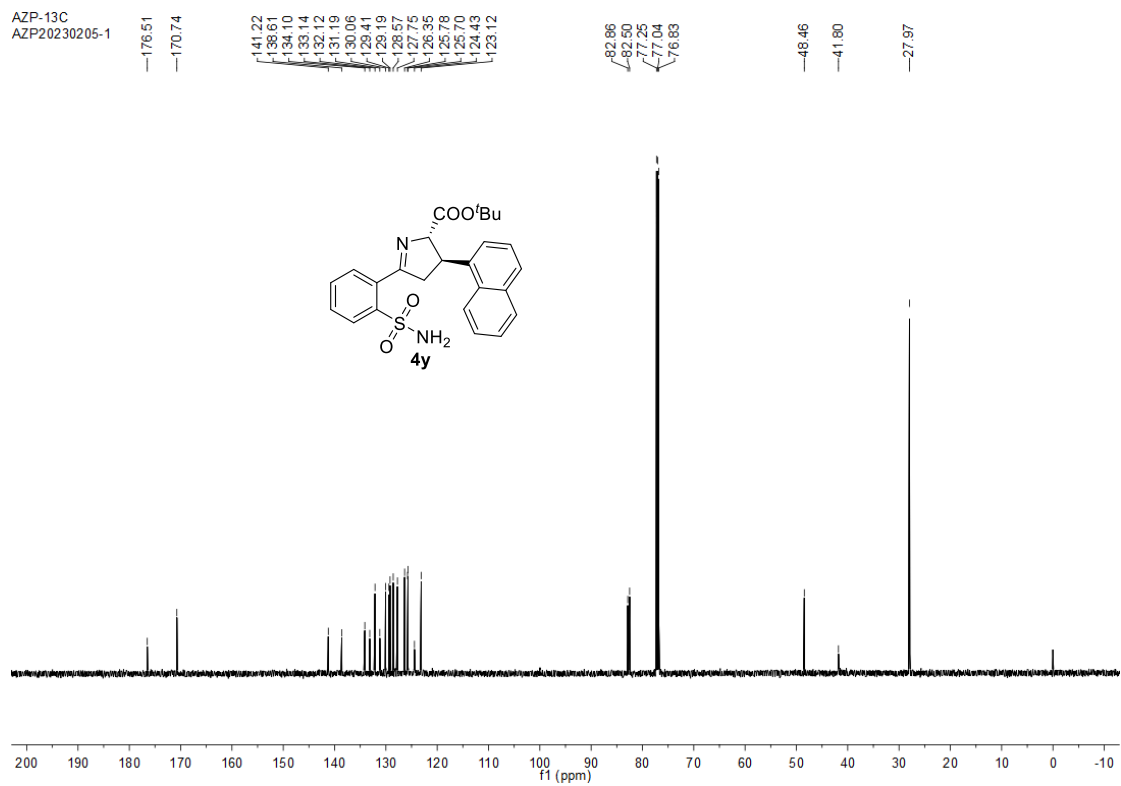



AZP-1H  
AZP20230206-1

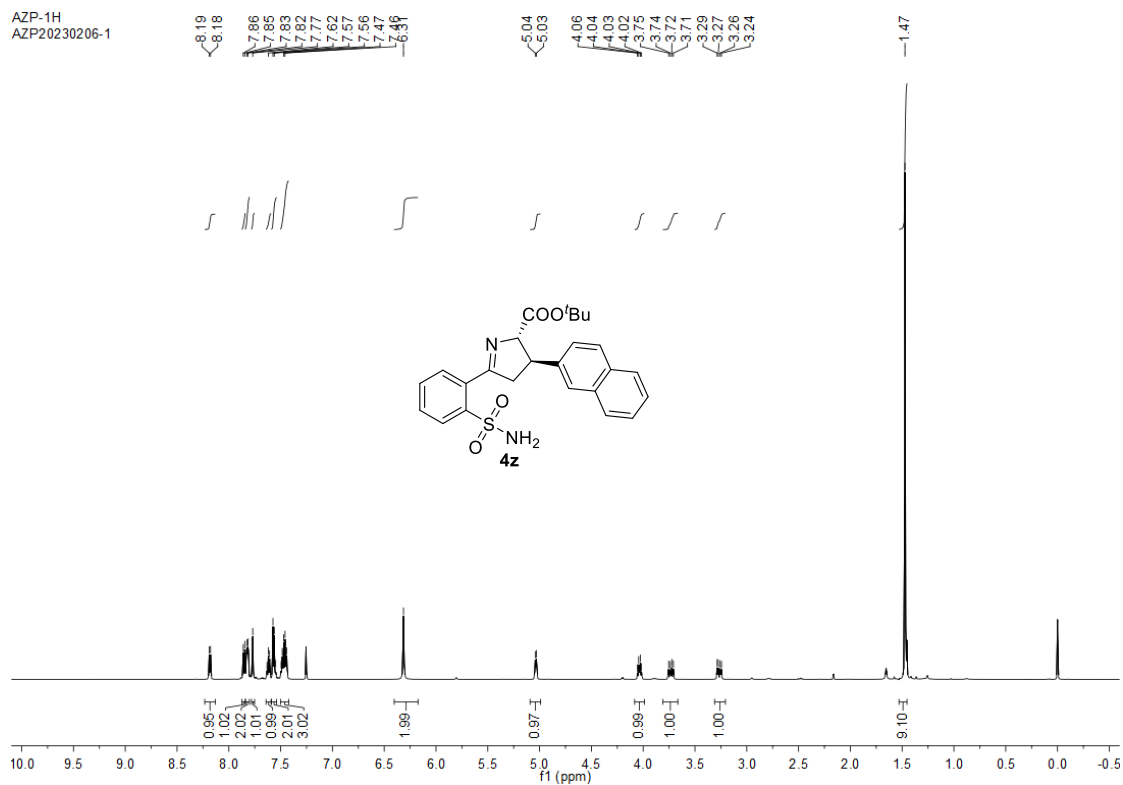

AZP-13C  
AZP20230206-1

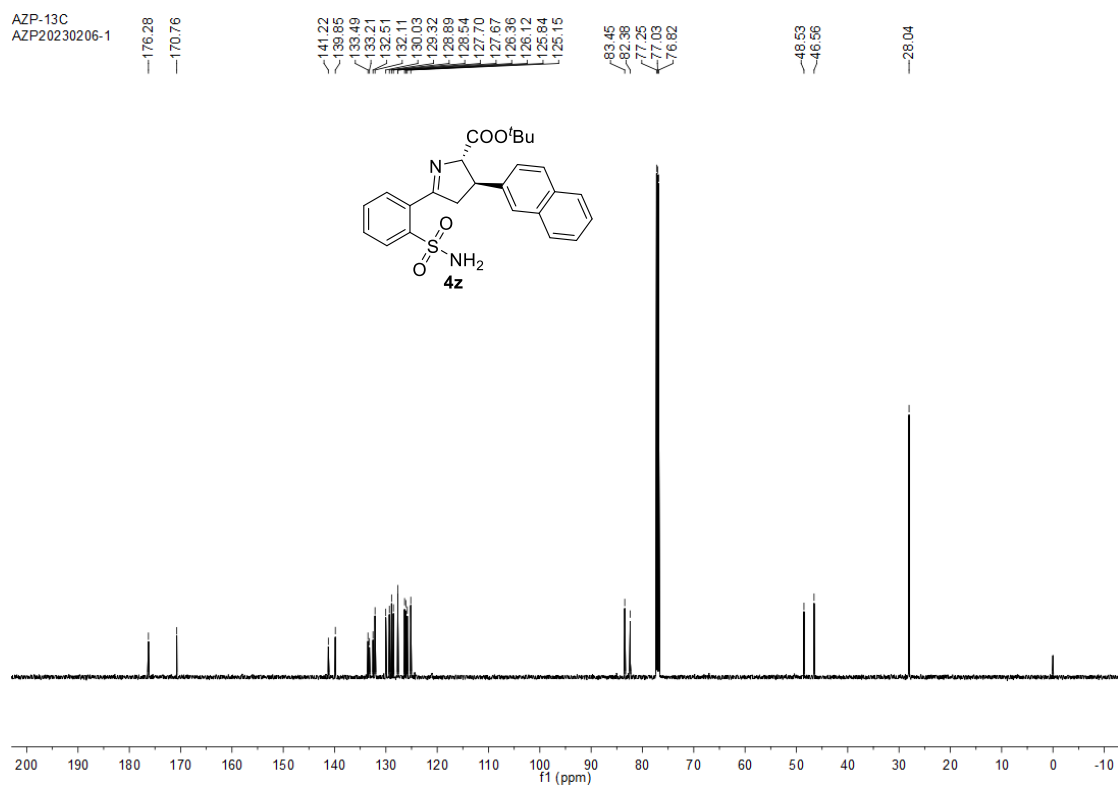

AZP-1H  
AZP20230210-1

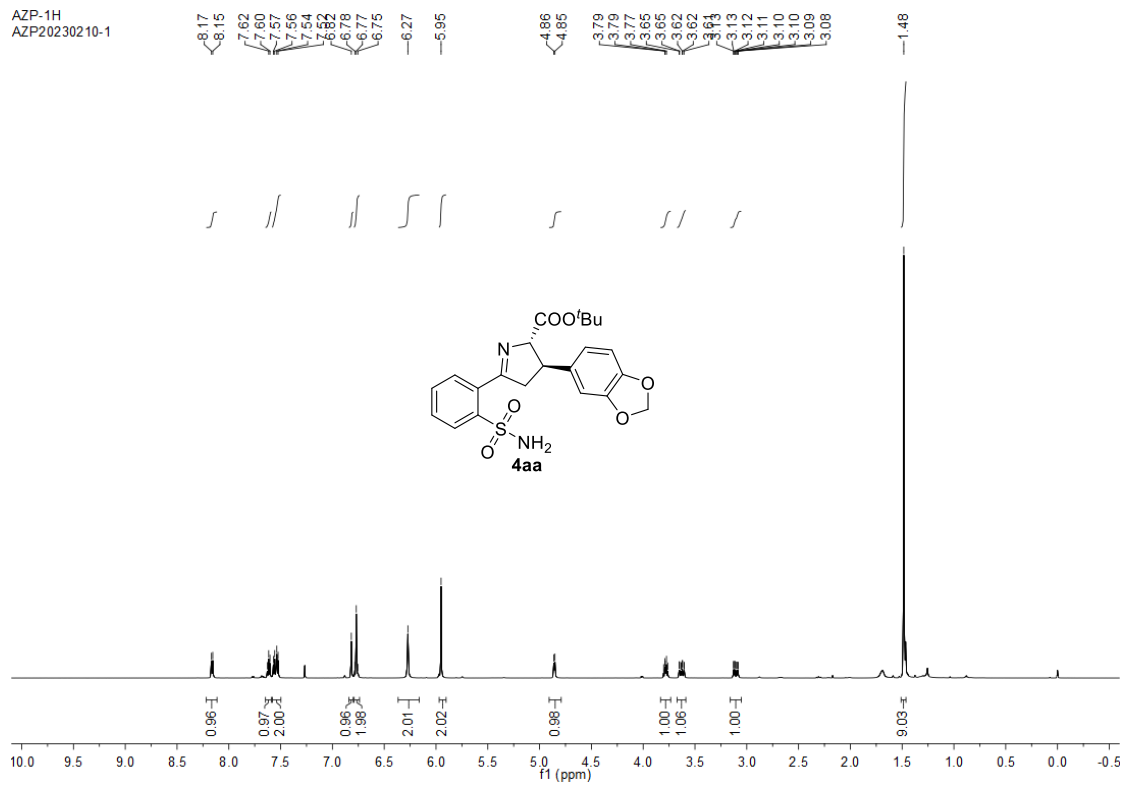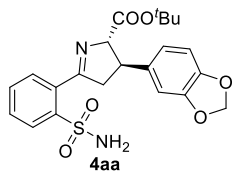

AZP-13C  
AZP20230210-1

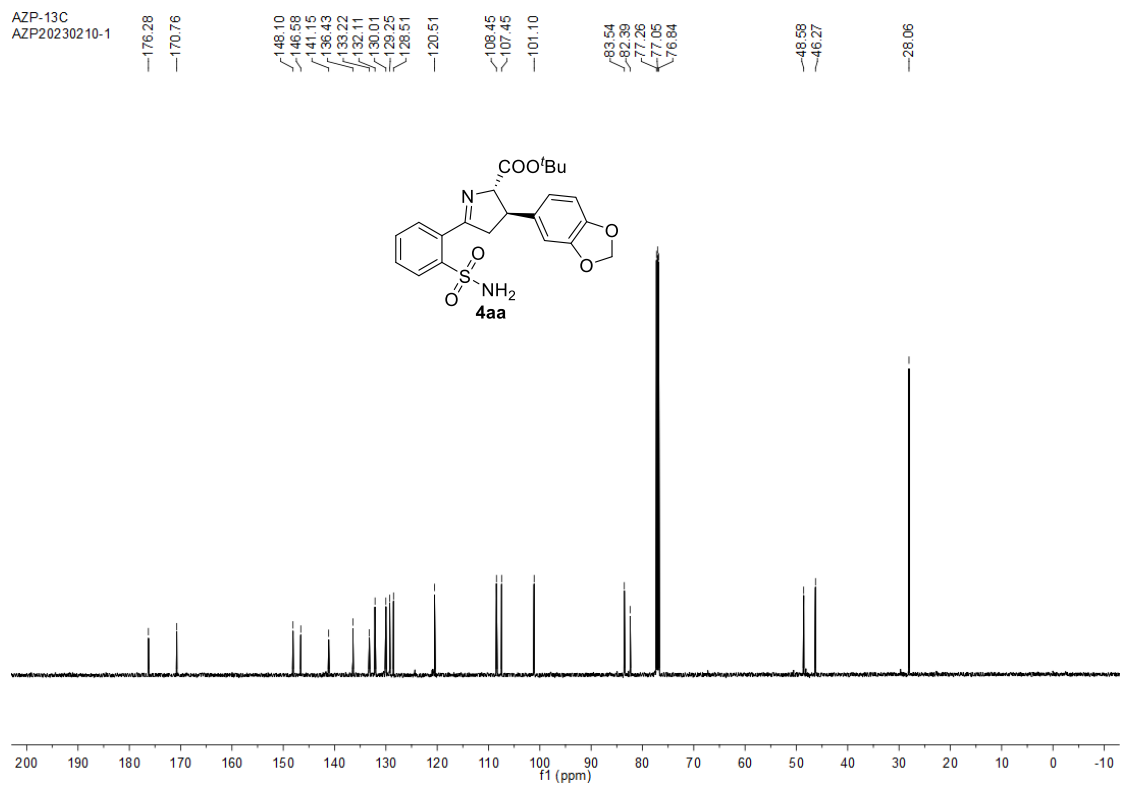

AZP-1H  
AZP20230207-1

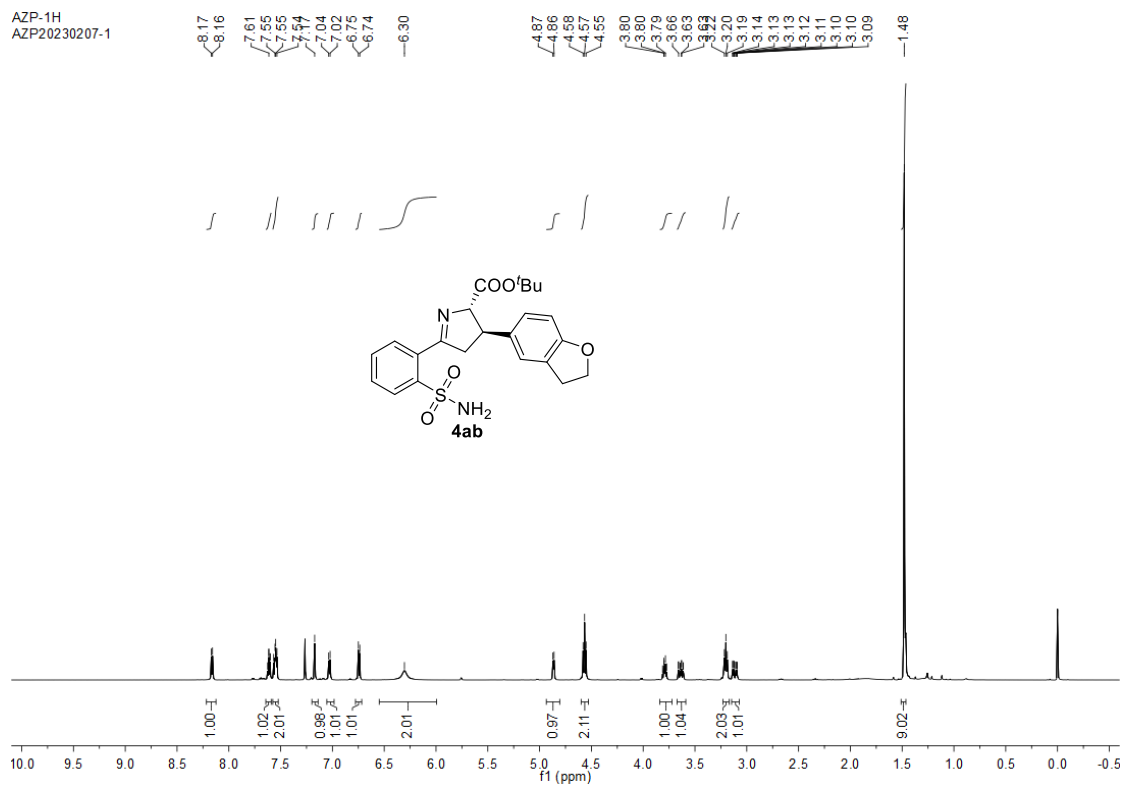

AZP-13C  
AZP20230207-1

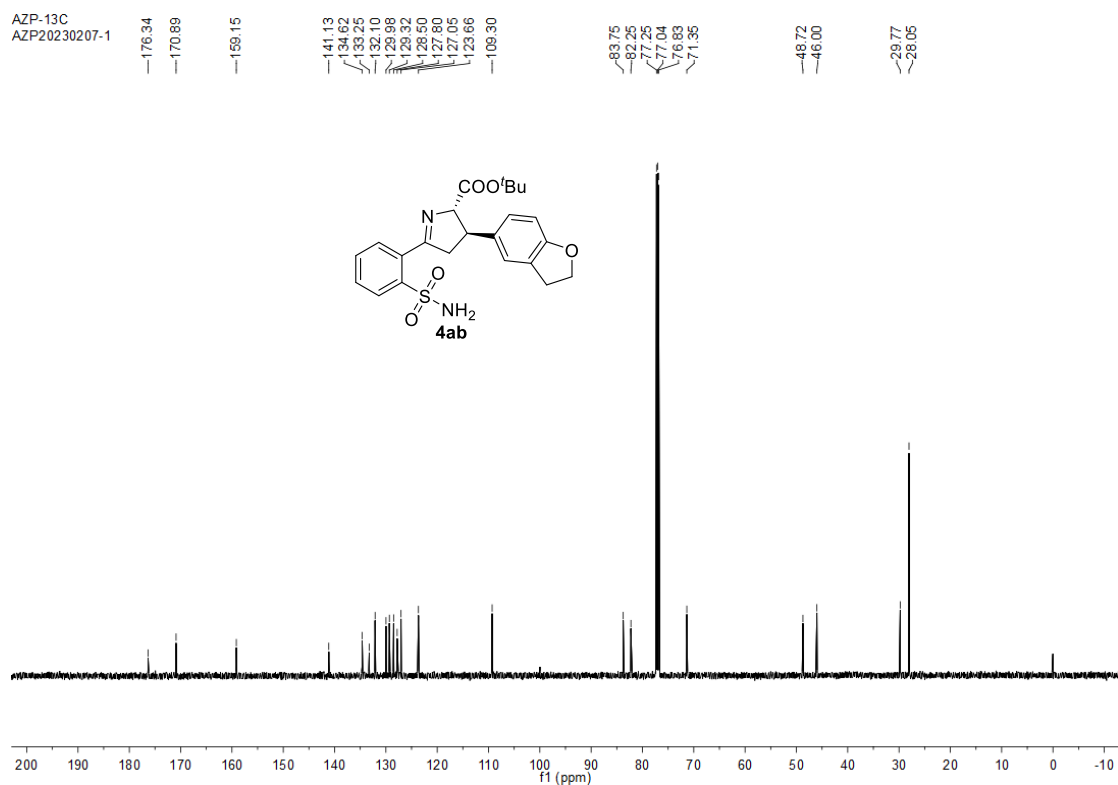

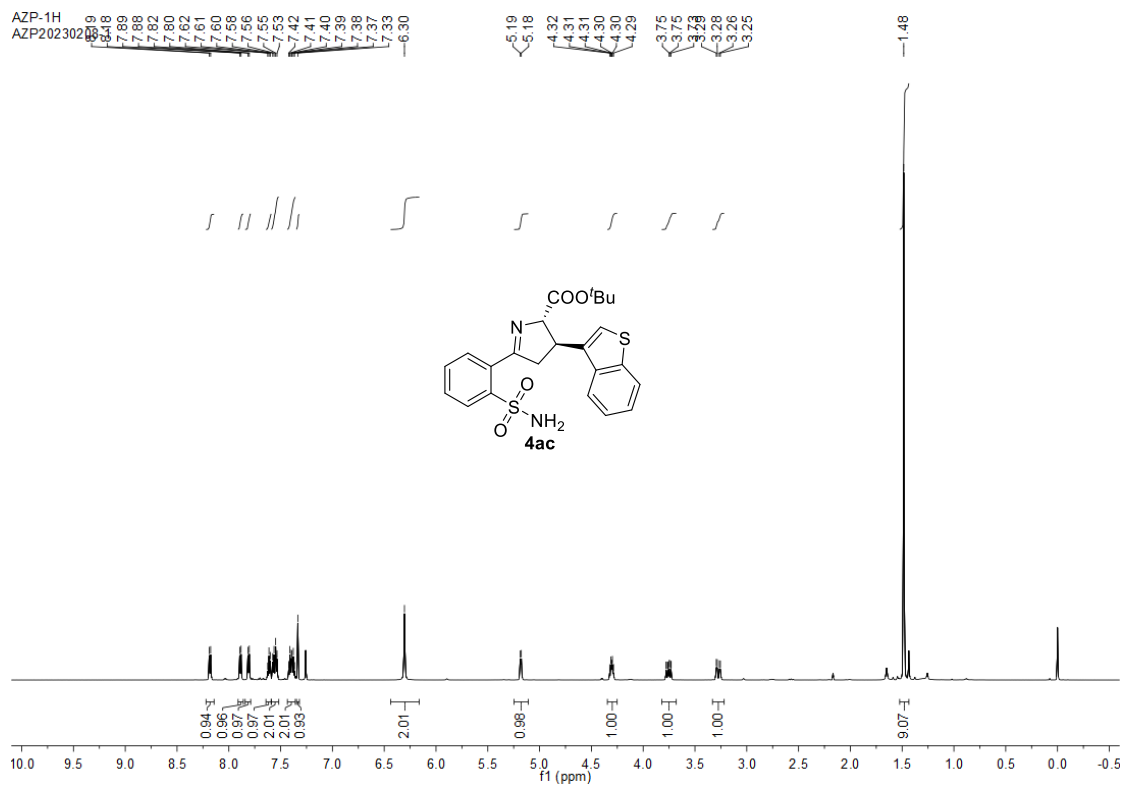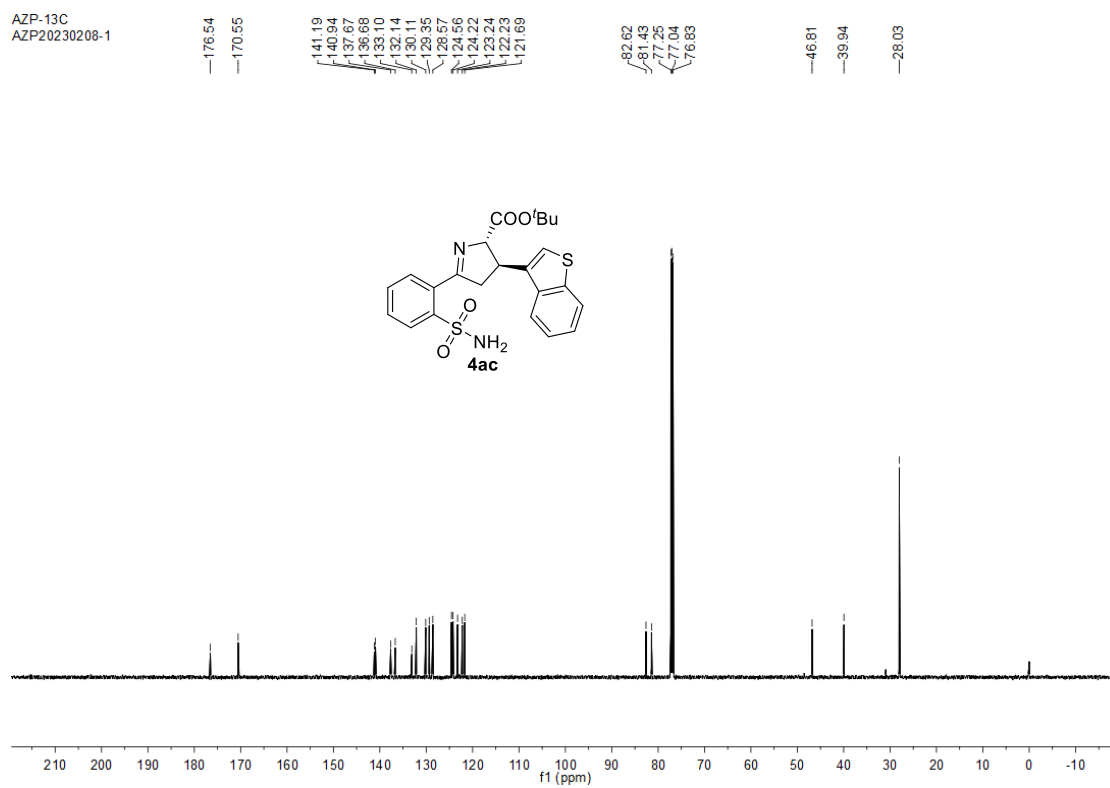

AZP-1H  
AZP20230216-1

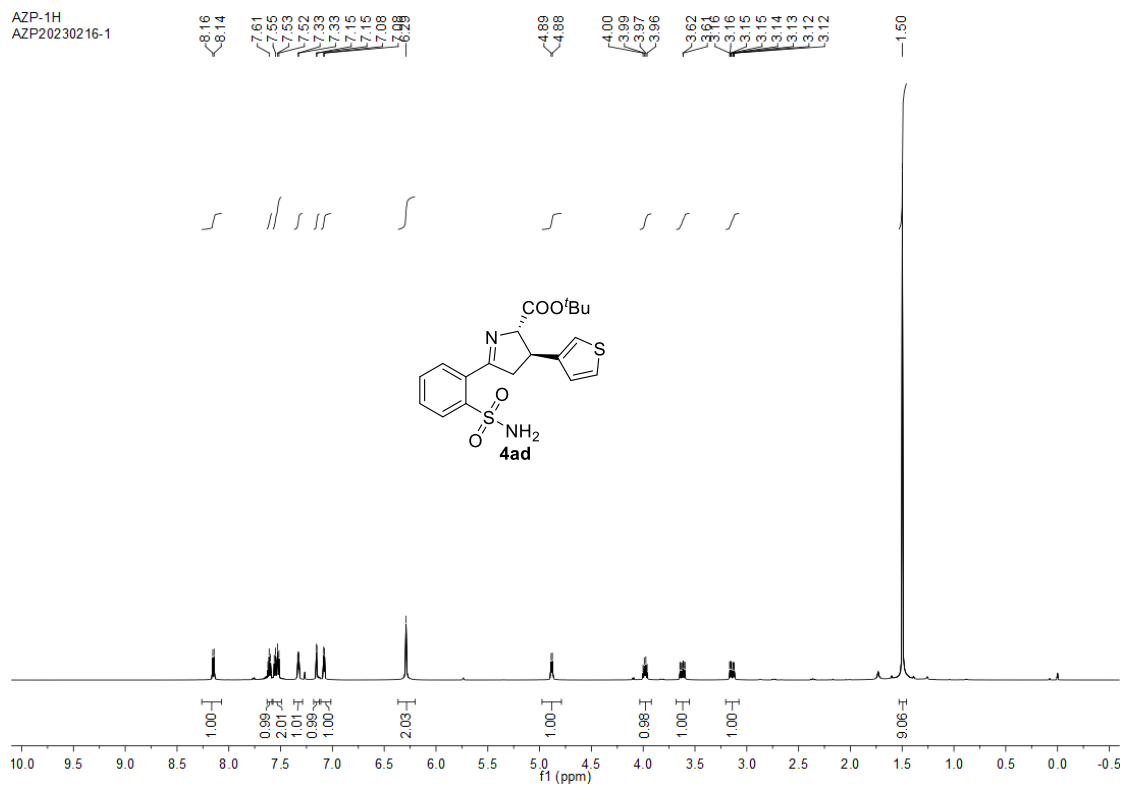

AZP-13C  
AZP20230216-1

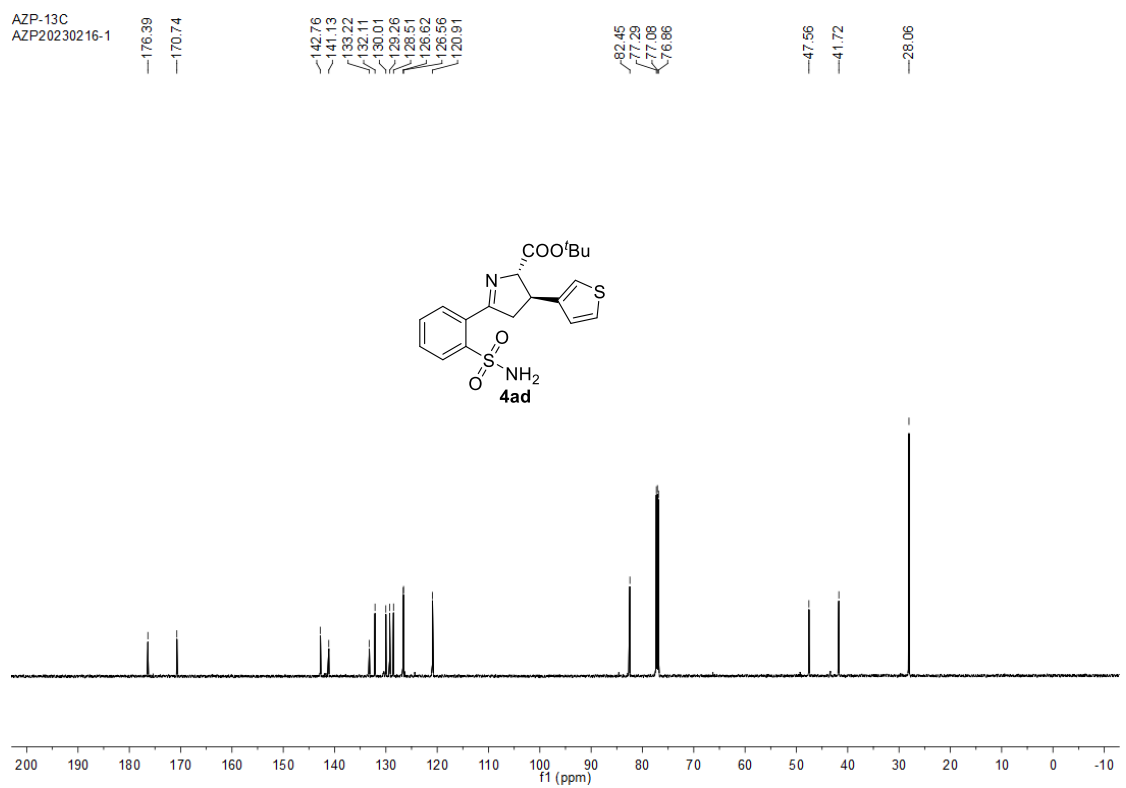

AZP-1H  
AZP20230217-1

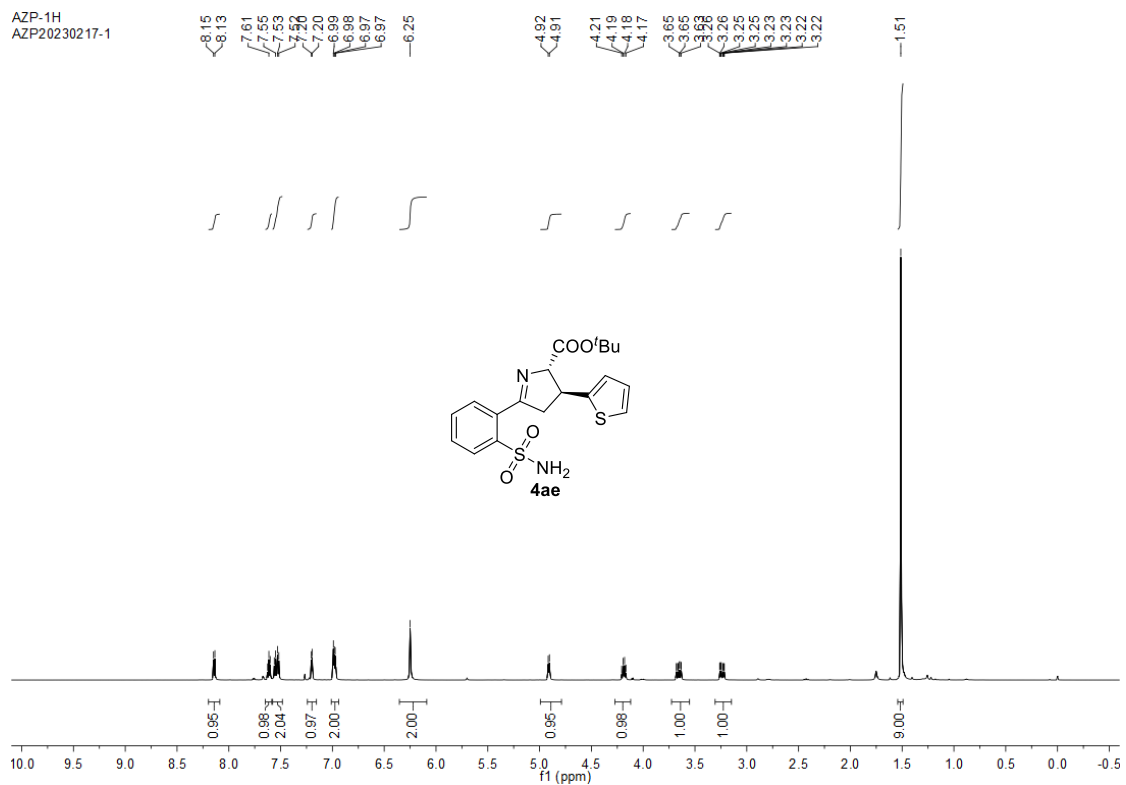

AZP-13C  
AZP20230217-1

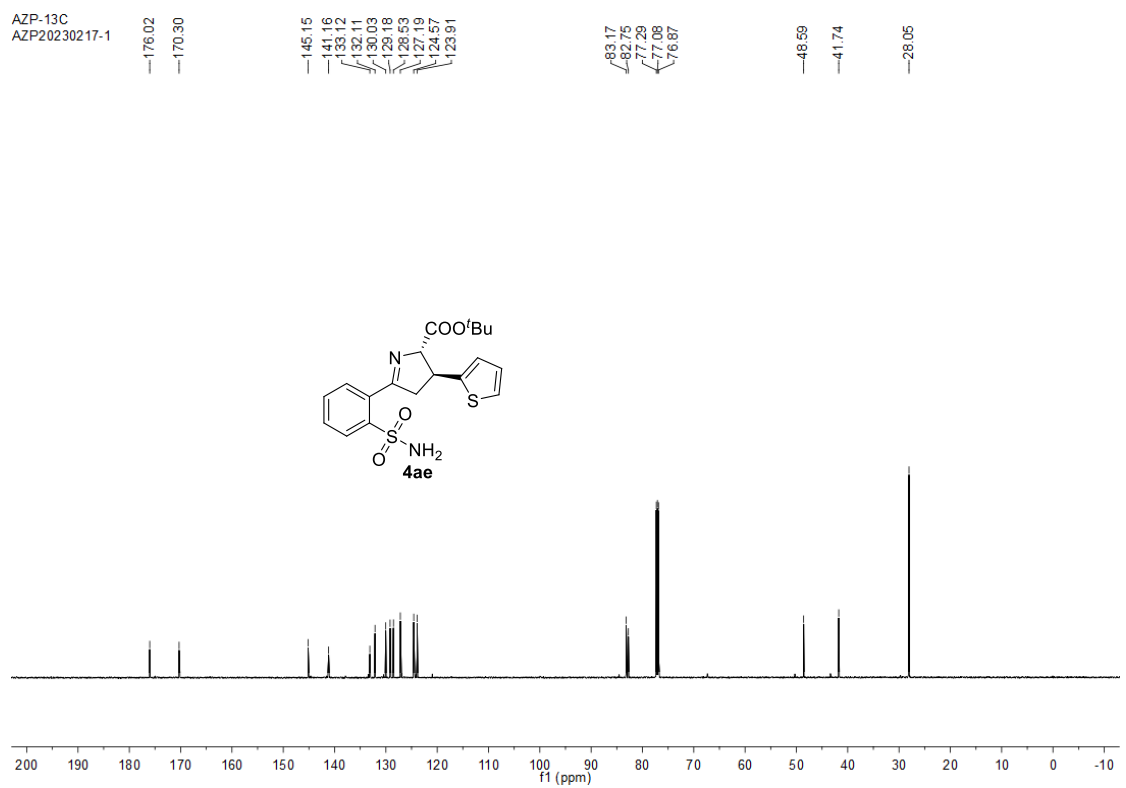

AZP-1H  
AZP20230218-1

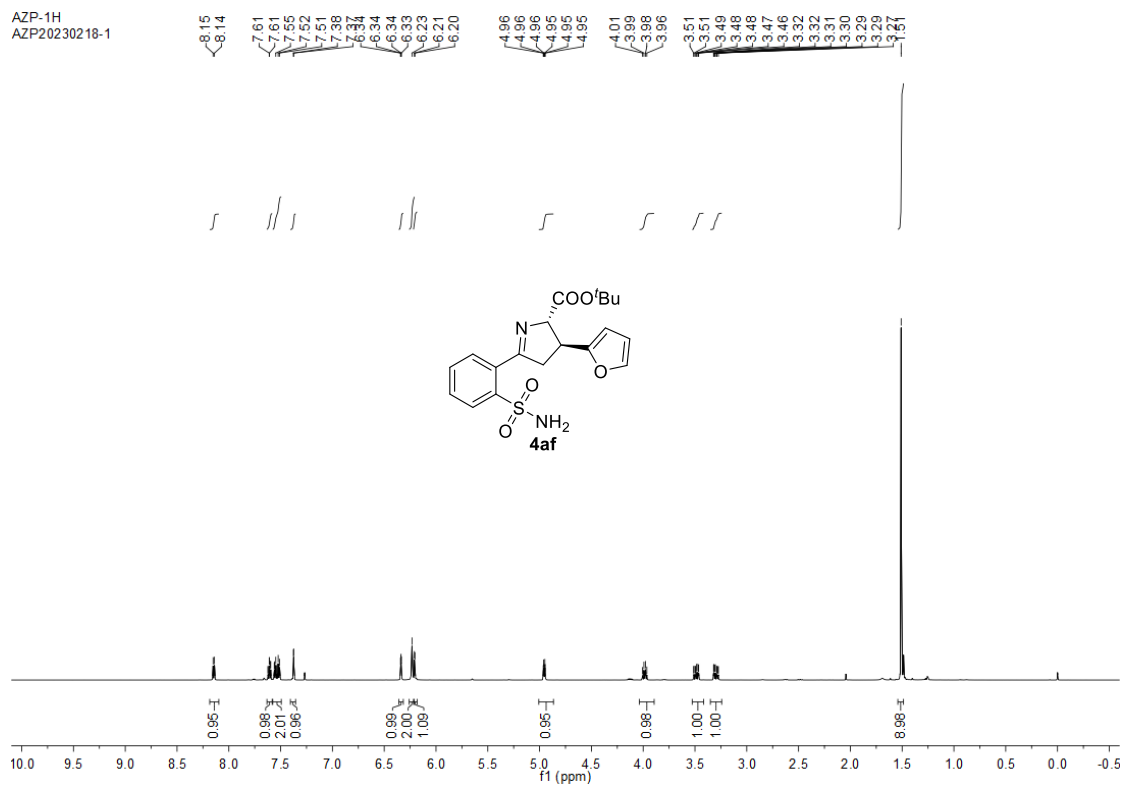

AZP-13C  
AZP20230218-1

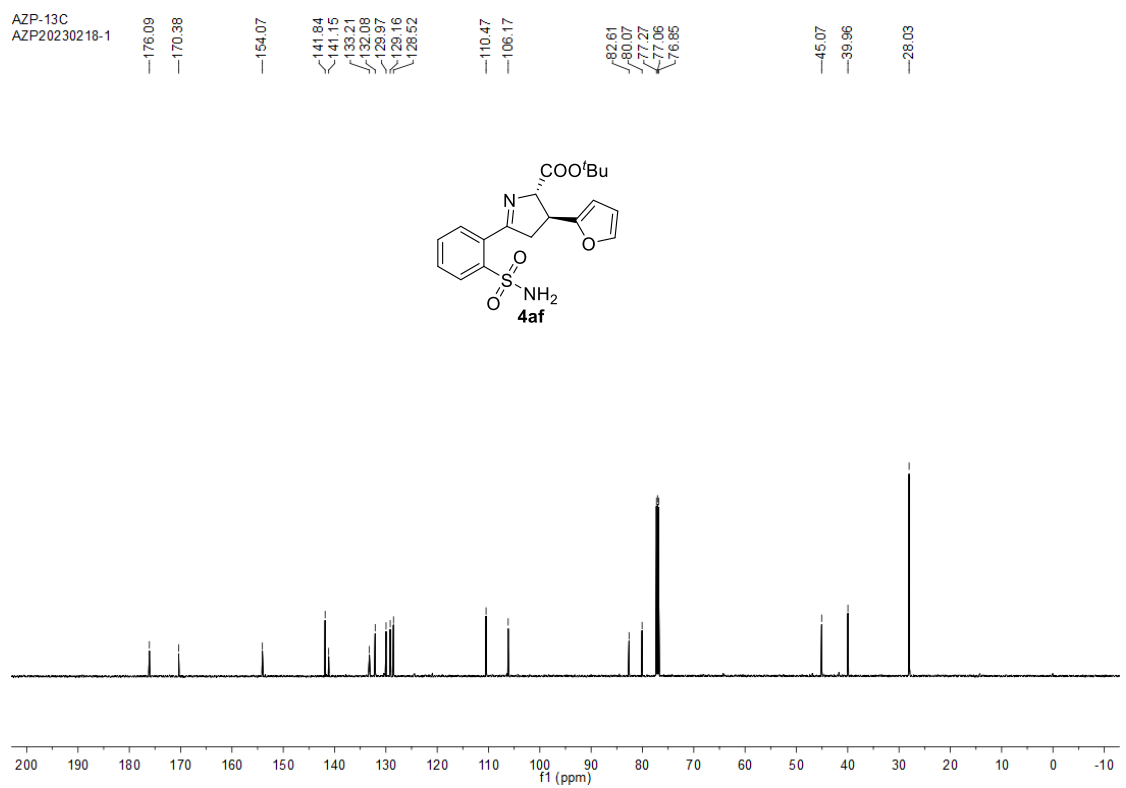

AZP-1H  
AZP20230220-1

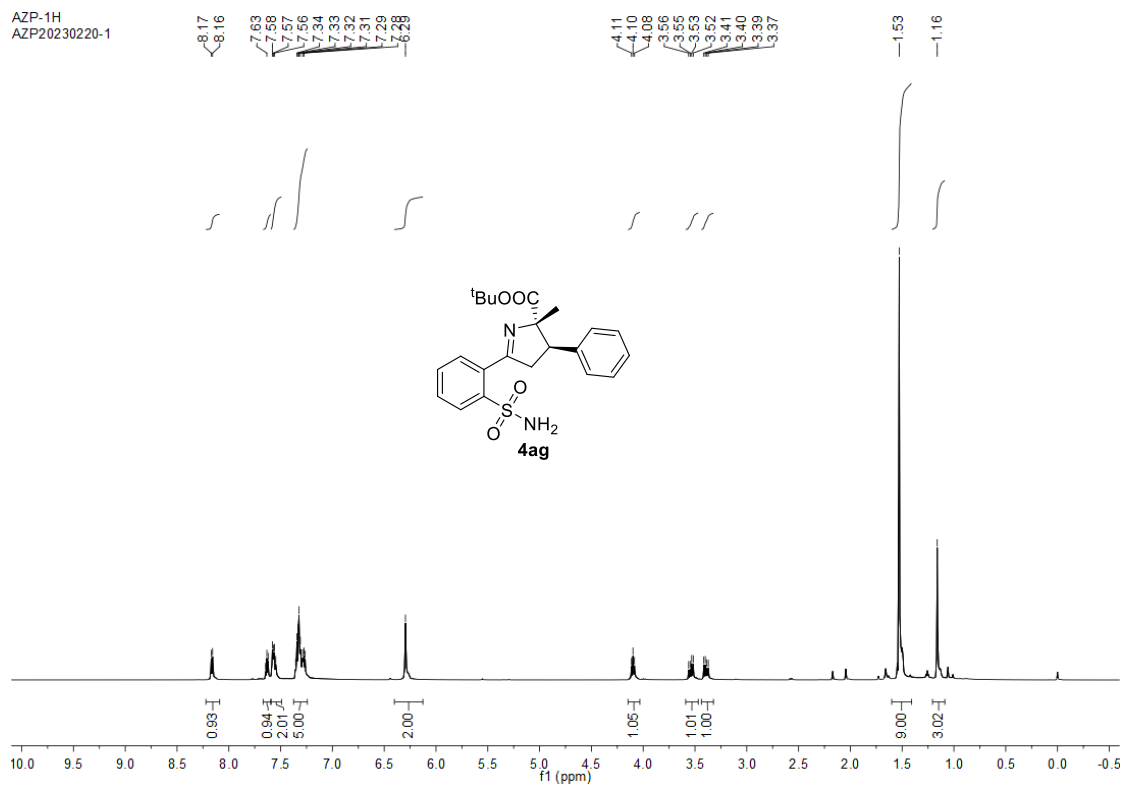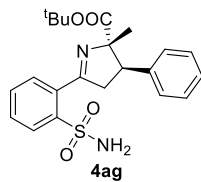

AZP-13C  
AZP20230220-1

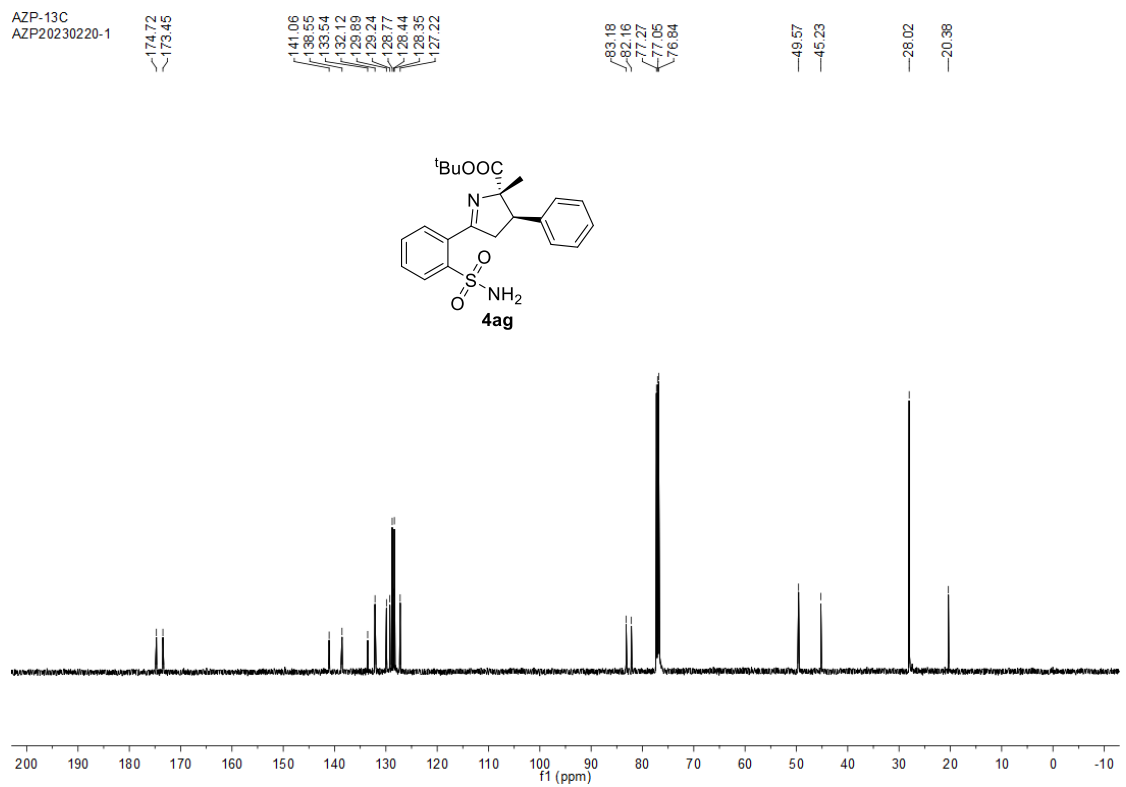

Supplement: d3qo01675g1.pdf [file d3qo01675g1.pdf]
